# Supplementary material for: Systems biology-guided biodesign of consolidated lignin conversion
Source: Royal Society of Chemistry journal article supplement (doi:10.1039/c6gc01131d), 2016-01-01
Supplement: c6gc01131d4.xlsx [file c6gc01131d4.xlsx]

## Sheet: lignin depolymerization
Table S1A. Expression levels (log2E) of lignin depolymerization enzymes in A514 cells.
gene ID	protuct	log2 E_glucose	log2 E_vanillate	log2 E_lignin_intra	log2 E_lignin_extra
PputA514_2985	Dye-decolorizing peroxidase	0	0	0	6.84386
PputA514_3972	Peroxidasin	0	0	3.72247	0
PputA514_4069	Non-heme chloroperoxidase	7.65814	0	8.71925	0
PputA514_5075	Alcohol oxidase	5.80555	6.14303		6.01859
PputA514_0720	Glucose oxidase	0	0	7.1153	0
PputA514_3677	Aldehyde oxidase	0	0	6.65564	8.16209
PputA514_3679	Aldehyde oxidase	5.61765	6.17772	6.90953	7.33119
PputA514_4684	Aldehyde oxidase	7.0562	5.70349	8.97971	8.44663
PputA514_5396	Pyruvate oxidase	7.96838	7.12536	7.63023	6.58586
PputA514_4585	Pyruvate oxidase	10.1668	10.7174	11.5415	11.5544
PputA514_6474	NAD(P)H dehydrogenase [quinone]	0	8.41433	0	8.84392
PputA514_3068	NAD(P)H dehydrogenase [quinone]	8.8653	0	0	8.50831
PputA514_5399	NADPH:quinone oxidoreductase	9.96811	10.4025	10.7547	10.4456
PputA514_1963	NADPH--cytochrome P450 reductase	0	5.5744	0	0
PputA514_3010	carbohydrate-selective porin OprB	0	0	6.4065	0

## Sheet: aromatic compounds catabolism
Table S1B. Expression levels (log2E) for enzymes, regulators and transporters involved in aromatic compound catabolic pathways
gene ID	protuct	log2 E_glucose	log2 E_vanillate	log2 E_lignin_intra	log2 E_lignin_extra
PputA514_1375	4-carboxymuconolactone decarboxylase	10.0179	13.7752	11.211	10.2406
PputA514_1376	3-oxoadipate enol-lactone hydrolase	9.31526	12.7876	11.7264	10.7499
PputA514_1377	3-carboxy-cis,cis-muconate cycloisomerase	8.97639	12.5003	10.9102	10.9336
PputA514_1378	metabolite/H+ symportermajor facilitator	5.76301	9.05901	7.23079	6.39857
PputA514_1379	protocatechuate 3,4-dioxygenase, alpha subunit	0	13.524	11.4986	10.7474
PputA514_1381	beta-ketoadipyl CoA thiolase	7.29948	13.5844	11.042	11.6682
PputA514_1380	protocatechuate 3,4-dioxygenase, beta subunit	7.98428	13.4552	13.4976	12.9174
PputA514_1382	3-oxoadipate CoA-transferase, subunit B	0	13.6528	11.8679	12.4066
PputA514_1383	3-oxoadipate CoA-transferase, subunit A	7.79799	12.2003	11.0867	9.66147
PputA514_0644	Vanillate O-demethylase oxygenase subunit (vanA)	0	13.992	12.2206	13.0951
PputA514_0645	Vanillate O-demethylase oxidoreductase (vanB)	0	11.9217	11.6027	11.4069
PputA514_0647	acyl-CoA dehydrogenase, ferrulic acid biotransformation protein, putative	0	0	0	6.33896
PputA514_0648	beta-ketothiolase	0	7.67927	8.14175	7.56045
PputA514_0649	feruloyl-CoA-synthetase	0	5.87701	8.2698	7.4839
PputA514_0650	vanillin dehydrogenase	4.87873	9.44094	12.0054	12.0356
PputA514_0651	enoyl-CoA hydratase/aldolase	0	8.95364	11.495	11.2736
PputA514_1250	4-hydroxybenzoate 3-monooxygenase	0	14.7161	10.0947	9.82285
PputA514_2607	vanillin dehydrogenase	8.21655	8.12658	9.82883	9.04108
PputA514_2626	vanillate O-demethylase oxidoreductase	0	0	8.04368	0
PputA514_2627	vanillate demethylase A	0	0	8.6524	7.20374
PputA514_4436	catechol 1,2-dioxygenase	0	0	0	8.45781
PputA514_4438	muconate cycloisomerase	0	0	7.10538	8.55551
PputA514_5351	cis-diol dehydrogenase	0	0	8.45849	0
PputA514_4417	benzoate-specific porin	0	5.86888	9.13348	0
PputA514_4696	benzoate MFS transporter	0	7.89785	6.95455	6.50993
PputA514_4272	transferase	10.0741	8.84734	9.81192	10.6838
PputA514_0960	3-hydroxypropionyl-coenzyme A dehydratase	0	0	8.10045	7.12691
PputA514_5155	Delta(3,5)-Delta(2,4)-dienoyl-CoA isomerase	0	7.15795	7.4776	7.41692
PputA514_4197	Delta(3,5)-Delta(2,4)-dienoyl-CoA isomerase	0	9.08499	7.97441	0
PputA514_5044	NADH oxidoreductase	0	0	6.62366	0
PputA514_0873	Inner membrane protein (YjcH)	0	0	11.5513	0
PputA514_5775	phenylacetic acid transporter (PhaJ)	0	6.34199	6.17572	6.21742
PputA514_6397	phenylalanine-4-hydroxylase	0	0	7.96665	0
PputA514_6398	pterin-4-alpha-carbinolamine dehydratase	0	0	9.67179	0
PputA514_2311	4-hydroxyphenylpyruvate dioxygenase	8.69141	9.37543	11.2286	10.7621
PputA514_6399	Aromatic-amino-acid aminotransferase	9.35502	9.79507	9.92241	9.66854
PputA514_1731	Homogentisate 1,2-dioxygenase	7.33749	8.53506	10.1385	9.43243
PputA514_1730	Fumarylacetoacetase	0	8.90965	10.9278	9.47377
PputA514_1729	Maleylacetoacetate isomerase	0	0	8.84768	8.01681
PputA514_3195	Multiple antibiotic resistance protein MarR	0	8.94011	7.8448	0
PputA514_2618	4-oxalomesaconate tautomerase	0	0	7.21723	0
PputA514_2619	4-carboxy-4-hydroxy-2-oxoadipic acid aldolase	0	8.3245	9.92343	9.37746
PputA514_2620	4-oxalmesaconate hydratase OS=Pseudomonas putida (strain KT2440) GN=galB PE=1 SV=1	0	9.89005	13.2446	12.6415
PputA514_2621	HTH-type transcriptional regulator GalR OS=Pseudomonas putida (strain KT2440) GN=galR PE=4 SV=1	6.30889	7.91283	8.63076	7.84392
PputA514_2622	Gallate dioxygenase OS=Pseudomonas putida (strain KT2440) GN=galA PE=1 SV=1	0	8.55543	10.5522	10.4214
PputA514_2623	Gallate transporter OS=Pseudomonas putida GN=galT PE=3 SV=1	0	0	7.98863	6.36177
PputA514_5045	Putative dioxygenase subunit alpha YeaW OS=Escherichia coli (strain K12) GN=yeaW PE=3 SV=1	0	0	7.03028	6.98596
PputA514_2343	3-hydroxyisobutyryl-CoA hydrolase	8.76197	9.42192	10.228	8.8016
PputA514_2606	Metapyrocatechase 2	0	0	6.41481	7.62615
PputA514_6121	Succinate semialdehyde dehydrogenase [NAD(P)+]	0	0	5.69961	0
PputA514_6323	HTH-type transcriptional repressor	7.54125	9.05584	9.10167	9.29462
PputA514_0307	Alkanesulfonate monooxygenase	7.32224	0	0	0
PputA514_0305	FMN reductase (NADPH)	7.65267	0	0	0
PputA514_0619	Isoquinoline 1-oxidoreductase subunit alpha	7.67666	8.99358	9.44822	9.48712
PputA514_0620	Isoquinoline 1-oxidoreductase subunit beta	8.79833	10.309	10.8697	10.1805
PputA514_0621	Isoquinoline 1-oxidoreductase subunit beta	0	8.44686	7.1535	8.76497
PputA514_5050	Probable N-methylproline demethylase	0	0	0	7.97602
PputA514_3464	Alpha-ketoglutarate-dependent taurine dioxygenase	8.15578	0	0	7.04691
PputA514_4406	Artemisinic aldehyde Delta(11(13)) reductase	9.07998	9.85737	11.8734	12.4295
PputA514_3008	Probable quinate dehydrogenase (quinone)	6.18011	0	6.04461	0
PputA514_5184	RND efflux system outer membrane lipoprotein	0	0	0	7.24117
PputA514_5185	Multidrug resistance protein MdtC	0	0	4.53294	0
PputA514_5186	Multidrug resistance protein MdtB	0	5.26379	0	0
PputA514_2303	alkyl hydroperoxide reductase	13.0261	12.8918	15.0672	15.2336
PputA514_2304	Alkyl hydroperoxide reductase subunit F	0	7.96047	9.93987	11.5584
PputA514_4867	catalase	11.4123	10.8408	13.1316	13.3261
PputA514_5911	major facilitator superfamily transporter	0	10.6489	10.4044	6.62615
PputA514_5912	major facilitator superfamily transporter	9.05019	10.0722	8.95188	8.10171
PputA514_1384	benzoate transporter	0	9.96664	7.64519	8.07342
PputA514_0177	extracellular solute-binding protein	8.2173	9.61053	10.2367	9.36943
PputA514_1377	3-carboxy-cis,cis-muconate cycloisomerase	8.97639	12.5003	10.9102	10.9336
PputA514_3513	sulfate ABC transporter ATPase	0	7.12562	7.06388	8.14417
PputA514_0654	outer membrane porin	0	6.4261	11.2315	10.5932
PputA514_2094	outer membrane porin	0	9.10052	11.229	8.1031
PputA514_0653	outer membrane porin	0	8.34274	11.226	11.3488
PputA514_1372	outer membrane porin	0	11.9219	11.2258	10.583
PputA514_5964	type II and III secretion system protein	0	0	11.0888	10.3055
PputA514_5911	major facilitator superfamily transporter	0	10.6489	10.4044	6.62615
PputA514_5668	ABC transporter-like protein	0	8.2198	9.24214	8.7926
PputA514_1753	polar amino acid ABC transporter inner membrane subunit	0	6.72301	8.84515	6.23907
PputA514_2513	amino acid ABC transporter ATP-binding protein	0	0	8.80898	8.32558
PputA514_1298	two component transcriptional regulator	0	0	8.70037	6.37981
PputA514_2154	proline/glycine betaine transporter	0	0	8.60023	9.21912
PputA514_0075	RpiR family transcriptional regulator	0	8.30401	8.19343	0
PputA514_4501	ferric uptake regulator family protein	0	0	8.13026	6.84392
PputA514_5966	type II secretion system protein E	0	0	7.95611	8.15094
PputA514_3310	branched chain amino acid ABC transporter substrate-binding protein	0	7.43024	7.15127	8.70021
PputA514_3513	sulfate ABC transporter ATPase	0	7.12562	7.06388	8.14417
PputA514_3332	ABC transporter ATP-binding protein	0	7.08082	6.32975	0
PputA514_4696	major facilitator family transporter	0	6.89785	5.95455	6.5719
PputA514_4268	major facilitator superfamily metabolite/H(+) symporter	0	6.05148	5.94099	0
PputA514_5971	two component LuxR family transcriptional regulator	0	0	10.4181	9.38523
PputA514_3204	LysR family transcriptional regulator	0	7.77489	8.77086	9.38523
PputA514_1298	two component transcriptional regulator	0	0	8.70037	8.68039
PputA514_2331	response regulator receiver sensor signal transduction histidine kinase	0	0	8.52963	6.37981
PputA514_5960	response regulator receiver protein	0	0	8.28496	7.54032
PputA514_0075	RpiR family transcriptional regulator	0	8.30401	8.19343	0
PputA514_4501	ferric uptake regulator family protein	0	0	8.13026	0
PputA514_1362	regulatory protein ArsR	0	0	8.12146	6.84392
PputA514_6155	GntR family transcriptional regulator	0	7.70151	8.11265	0
PputA514_1385	pca regulon regulatory protein	0	9.04223	8.05989	6.86208
PputA514_3508	AraC family transcriptional regulator	0	0	8.05563	6.05148
PputA514_1512	TetR family transcriptional regulator	0	0	7.9982	0
PputA514_4116	two component transcriptional regulator	0	8.04319	7.82008	0
PputA514_5564	GntR family transcriptional regulator	0	0	7.76964	0
PputA514_0074	RpiR family transcriptional regulator	0	0	7.76921	6.3166
PputA514_0486	two component transcriptional regulator	0	0	7.75432	8.24439
PputA514_1251	AraC family transcriptional regulator	0	0	7.62527	6.37147
PputA514_1263	LysR family transcriptional regulator	0	6.95396	7.4385	0
PputA514_1005	two component transcriptional regulator	0	0	7.43346	7.47005
PputA514_2790	LysR family transcriptional regulator	0	0	7.30943	0
PputA514_6419	MarR family transcriptional regulator	0	0	7.0581	7.93596
PputA514_2604	Transcriptional regulator KdgR	0	0	7.03903	0
PputA514_5807	LysR family transcriptional regulator	0	0	7.03	7.88682
PputA514_1675	GntR family transcriptional regulator	0	0	6.93552	0
PputA514_3195	MarR family transcriptional regulator	0	7.94011	6.8448	7.06749
PputA514_4432	LysR family transcriptional regulator	0	0	6.64803	0
PputA514_0323	AraC family transcriptional regulator	0	0	6.54086	5.94673
PputA514_1338	XRE family transcriptional regulator	0	0	6.52097	0
PputA514_0419	response regulator receiver protein	0	0	6.4776	8.13242
PputA514_6107	LysR family transcriptional regulator	0	0	6.34501	0
PputA514_1073	transcription regulator protein	0	6.02037	6.34012	0
PputA514_5347	two component transcriptional regulator	0	0	6.31288	0
PputA514_2869	Probable rhizopine catabolism regulatory protein MocR	0	5.33896	6.29306	0
PputA514_0700	Uncharacterized HTH-type transcriptional regulator YjiR	0	7.9305	0	0
PputA514_3573	Transcriptional regulator SlyA	0	10.6638	0	0

## Sheet: PHA sysnthesis and fatty acid
Table S1C. Expression levels (log2E) for enzymes involved in PHA synthesis and fatty acid metabolism.
gene ID	protuct	log2 E_glucose	log2 E_vanillate	log2 E_lignin_intra	log2 E_lignin_extra
PputA514_6244	3-ketoacyl-CoA thiolase OS=Bacillus subtilis (strain 168) GN=fadA PE=2 SV=1	6.63749	0	9.81607	10.7396
PputA514_4994	Short/branched chain specific acyl-CoA dehydrogenase, mitochondrial OS=Homo sapiens GN=ACADSB PE=1 SV=1	0	0	9.33346	9.09856
PputA514_4993	Acyl-CoA dehydrogenase OS=Bacillus subtilis (strain 168) GN=mmgC PE=2 SV=3	8.16433	8.57567	9.82039	10.9053
PputA514_0647	Isobutyryl-CoA dehydrogenase, mitochondrial OS=Dictyostelium discoideum GN=acad8 PE=3 SV=1	0	0	0	6.33896
PputA514_4458	Glutaryl-CoA dehydrogenase, mitochondrial OS=Dictyostelium discoideum GN=gcdh PE=3 SV=1	7.44853	8.96908	9.94056	9.13679
PputA514_5235	Acyl-coenzyme A dehydrogenase OS=Yersinia pestis GN=fadE PE=3 SV=1	5.95105	6.09951	0	0
PputA514_0816	Acyl-coenzyme A dehydrogenase OS=Escherichia coli (strain K12) GN=fadE PE=2 SV=2	8.00048	6.53877	9.86956	8.41619
PputA514_2341	Probable enoyl-CoA hydratase OS=Rhizobium meliloti (strain 1021) GN=fadB1 PE=3 SV=2	11.2026	11.7753	11.1971	11.1
PputA514_5834	Poly(3-hydroxyalkanoate) polymerase 1 OS=Pseudomonas oleovorans GN=phaA PE=3 SV=1	7.14047	8.66566	8.54919	7.6291
PputA514_5836	Poly(3-hydroxyalkanoate) polymerase 2 OS=Pseudomonas oleovorans GN=phaC PE=3 SV=1	0	0	6.23247	0
PputA514_1201	Fatty acid oxidation complex subunit alpha OS=Pseudomonas fluorescens (strain SBW25) GN=fadB PE=3 SV=1	9.75497	10.6461	12.7951	12.3081
PputA514_1200	3-ketoacyl-CoA thiolase OS=Pseudomonas fluorescens (strain Pf-5 / ATCC BAA-477) GN=fadA PE=3 SV=1	10.0865	10.6422	12.0439	11.1344
PputA514_4070	(R)-specific enoyl-CoA hydratase OS=Aeromonas caviae GN=phaJ PE=1 SV=1	7.25233	0	9.62324	7.89533
PputA514_4767	Probable enoyl-CoA hydratase 1 OS=Mycobacterium tuberculosis GN=Rv0130 PE=1 SV=1	10.9361	11.0296	10.5944	10.395
PputA514_5955	[protein=Dehydratase,organism=BIRD-1]	6.8132	0	10.163	8.49251
PputA514_5079	Rhamnosyltransferase 1 subunit A OS=Pseudomonas aeruginosa (strain ATCC 15692 / PAO1 / 1C / PRS 101 / LMG 12228) GN=rhlA PE=2 SV=2	7.06975	0	8.62976	7.71297

## Sheet: All protein expression levels
Table S1D. Expression levels （log2E） of all detected proteins in A514 cells under different carbon sources
Protein	product	log2 E_glucose	log2 E_vanillate	log2 E_lignin_intra	log2 E_lignin_extra
PputA514_5237	alkane oxidation PraA	0	0	9.27752	17.8691
PputA514_6386	B-type flagellin OS=Pseudomonas aeruginosa (strain ATCC 15692 / PAO1 / 1C / PRS 101 / LMG 12228) GN=fliC PE=1 SV=2	14.1925	14.4606	9.51437	16.6691
PputA514_1401	Leucine-, isoleucine-, valine-, threonine-, and alanine-binding protein OS=Pseudomonas aeruginosa (strain ATCC 15692 / PAO1 / 1C / PRS 101 / LMG 12228) GN=braC PE=1 SV=2	14.308	15.4529	15.3282	15.6833
PputA514_4236	60 kDa chaperonin OS=Pseudomonas fluorescens (strain SBW25) GN=groL PE=3 SV=1	14.8362	15.3043	15.2029	15.5236
PputA514_6415	Long-chain fatty acid transport protein OS=Escherichia coli O6:H1 (strain CFT073 / ATCC 700928 / UPEC) GN=fadL PE=3 SV=2	12.8398	13.974	15.5873	15.3617
PputA514_2303	Alkyl hydroperoxide reductase subunit C OS=Salmonella typhimurium (strain LT2 / SGSC1412 / ATCC 700720) GN=ahpC PE=1 SV=2	12.9945	12.8802	15.0633	15.1928
PputA514_3701	Outer membrane porin F OS=Pseudomonas fluorescens GN=oprF PE=1 SV=1	15.8743	14.9626	13.7797	15.1623
PputA514_4896	Elongation factor Tu OS=Pseudomonas fluorescens (strain SBW25) GN=tuf PE=3 SV=1	15.0466	15.337	15.5608	15.1372
PputA514_4168	Porin D OS=Pseudomonas aeruginosa (strain ATCC 15692 / PAO1 / 1C / PRS 101 / LMG 12228) GN=oprD PE=1 SV=1	12.9532	15.2187	15.1951	14.9965
PputA514_2738	Uncharacterized protein YmdF OS=Escherichia coli (strain K12) GN=ymdF PE=3 SV=1	12.4432	0	14.6594	14.9577
PputA514_0452	UPF0312 protein PFL_5802 OS=Pseudomonas fluorescens (strain Pf-5 / ATCC BAA-477) GN=PFL_5802 PE=3 SV=1	12.9709	12.8062	14.2844	14.8581
PputA514_1755	Putative amino-acid ABC transporter-binding protein YhdW OS=Escherichia coli O157:H7 GN=yhdW PE=3 SV=1	13.8487	15.27	14.9114	14.5577
PputA514_4638	Chaperone protein DnaK OS=Pseudomonas fluorescens (strain Pf-5 / ATCC BAA-477) GN=dnaK PE=3 SV=1	13.9502	14.3446	14.5788	14.5163
PputA514_3898	Flagellar hook protein FlgE OS=Escherichia coli (strain K12) GN=flgE PE=3 SV=3	8.96681	7.01197	7.08873	14.507
PputA514_4131	Temperature acclimation protein B (Fragment) OS=Pseudomonas fragi GN=tapB PE=2 SV=1	15.8099	14.394	15.1291	14.4678
PputA514_1525	Outer membrane porin F OS=Pseudomonas aeruginosa (strain ATCC 15692 / PAO1 / 1C / PRS 101 / LMG 12228) GN=oprF PE=1 SV=1	14.0844	10.6558	14.1855	14.3089
PputA514_3813	Electron transfer flavoprotein subunit alpha OS=Pseudomonas aeruginosa (strain ATCC 15692 / PAO1 / 1C / PRS 101 / LMG 12228) GN=etfA PE=3 SV=1	15.581	14.8679	14.5959	14.1706
PputA514_4616	Osmotically-inducible protein Y OS=Escherichia coli (strain K12) GN=osmY PE=1 SV=1	14.8876	5.50384	12.7894	14.1198
PputA514_5672	Leu/Ile/Val-binding protein homolog 1 OS=Brucella abortus biovar 1 (strain 9-941) GN=BruAb1_1767 PE=3 SV=1	11.7798	13.7847	14.0943	14.0001
PputA514_0021	ATP synthase subunit beta OS=Pseudomonas fluorescens (strain SBW25) GN=atpD PE=3 SV=1	13.4955	13.0437	13.9784	13.9931
PputA514_5671	Leu/Ile/Val-binding protein homolog 1 OS=Brucella suis biovar 1 (strain 1330) GN=BR1785 PE=3 SV=1	11.0948	11.9777	14.4539	13.9704
PputA514_1837	Uncharacterized protein PA3922 OS=Pseudomonas aeruginosa (strain ATCC 15692 / PAO1 / 1C / PRS 101 / LMG 12228) GN=PA3922 PE=1 SV=1	11.1045	11.378	13.9457	13.7536
PputA514_3899	Basal-body rod modification protein FlgD OS=Escherichia coli (strain K12) GN=flgD PE=3 SV=1	0	0	3.81482	13.6896
PputA514_4412	50S ribosomal protein L21 OS=Pseudomonas syringae pv. tomato (strain DC3000) GN=rplU PE=3 SV=1	14.5753	15.1905	13.0194	13.6776
PputA514_6394	Flagellar basal-body rod protein FlgF OS=Escherichia coli (strain K12) GN=flgF PE=3 SV=1	0	0	7.48176	13.6731
PputA514_5886	Glutamine synthetase OS=Pseudomonas aeruginosa (strain ATCC 15692 / PAO1 / 1C / PRS 101 / LMG 12228) GN=glnA PE=1 SV=1	12.2891	13.185	13.4832	13.6004
PputA514_1487	Elongation factor Ts OS=Pseudomonas fluorescens (strain SBW25) GN=tsf PE=3 SV=1	15.1509	14.2104	14.0369	13.5842
PputA514_1610	Glutamate/aspartate periplasmic-binding protein OS=Salmonella typhimurium (strain LT2 / SGSC1412 / ATCC 700720) GN=gltI PE=3 SV=3	11.9681	11.9955	12.9891	13.582
PputA514_5679	Azurin OS=Pseudomonas fluorescens biotype A PE=1 SV=1	12.5929	11.6651	9.75381	13.5317
PputA514_1488	30S ribosomal protein S2 OS=Pseudomonas fluorescens (strain SBW25) GN=rpsB PE=3 SV=1	14.3912	13.2459	13.3071	13.4597
PputA514_4897	Elongation factor G OS=Pseudomonas fluorescens (strain SBW25) GN=fusA PE=3 SV=1	12.5415	13.672	13.1252	13.4594
PputA514_4870	30S ribosomal protein S4 OS=Pseudomonas fluorescens (strain SBW25) GN=rpsD PE=3 SV=1	14.2253	13.4462	12.8766	13.3991
PputA514_0163	RutC family protein in vnfA 5'region OS=Azotobacter vinelandii PE=3 SV=2	14.3144	12.4439	13.2522	13.3873
PputA514_3249	DNA-binding protein HU-beta OS=Pseudomonas fluorescens (strain Pf-5 / ATCC BAA-477) GN=hupB PE=3 SV=1	14.4088	15.1799	14.2658	13.3687
PputA514_4147	Peptidoglycan-associated lipoprotein OS=Pseudomonas putida GN=pal PE=3 SV=1	13.9661	13.7903	13.7953	13.3571
PputA514_6393	Flagellar basal-body rod protein FlgG OS=Salmonella typhimurium (strain LT2 / SGSC1412 / ATCC 700720) GN=flgG PE=1 SV=1	3.96244	0	4.16694	13.3562
PputA514_3094	Isocitrate dehydrogenase [NADP] OS=Coxiella burnetii (strain RSA 493 / Nine Mile phase I) GN=icd PE=1 SV=1	11.8137	12.2956	13.1278	13.3451
PputA514_4891	50S ribosomal protein L2 OS=Pseudomonas fluorescens (strain SBW25) GN=rplB PE=3 SV=1	11.8772	12.7638	11.8983	13.345
PputA514_4867	Catalase OS=Onchocerca volvulus endobacterium GN=cat PE=2 SV=1	11.3669	10.753	13.1311	13.3031
PputA514_4894	50S ribosomal protein L3 OS=Pseudomonas fluorescens (strain SBW25) GN=rplC PE=3 SV=1	14.4837	14.4325	14.0542	13.2829
PputA514_0855	Chaperone protein HtpG OS=Pseudomonas fluorescens (strain SBW25) GN=htpG PE=3 SV=1	12.494	13.5439	13.78	13.2729
PputA514_4541	-	11.4786	9.61277	13.7399	13.2715
PputA514_4237	10 kDa chaperonin OS=Pseudomonas fluorescens (strain Pf0-1) GN=groS PE=1 SV=1	14.5651	15.0242	13.4476	13.2659
PputA514_0341	hypothetical protein	13.2419	11.6978	12.636	13.2408
PputA514_1445	Lysine-arginine-ornithine-binding periplasmic protein OS=Salmonella typhimurium (strain LT2 / SGSC1412 / ATCC 700720) GN=argT PE=1 SV=2	12.9197	14.8344	14.0264	13.2301
PputA514_6384	A-type flagellar hook-associated protein 2 OS=Pseudomonas aeruginosa GN=fliD PE=3 SV=1	3.03809	7.58216	0	13.2185
PputA514_0862	Dihydrolipoamide dehydrogenase OS=Pseudomonas putida GN=lpdG PE=1 SV=4	11.9484	13.425	13.5917	13.2087
PputA514_4091	Superoxide dismutase [Fe] OS=Pseudomonas putida GN=sodB PE=1 SV=3	13.3825	14.4966	14.5024	13.1789
PputA514_3253	Trigger factor OS=Pseudomonas fluorescens (strain SBW25) GN=tig PE=3 SV=1	13.9853	13.9734	12.8877	13.1765
PputA514_0020	ATP synthase subunit beta OS=Pseudomonas fluorescens (strain SBW25) GN=atpD PE=3 SV=1	12.5567	12.8084	12.6393	13.1415
PputA514_4869	DNA-directed RNA polymerase subunit alpha OS=Pseudomonas fluorescens (strain Pf0-1) GN=rpoA PE=3 SV=1	14.4202	14.4429	13.638	13.1413
PputA514_2053	50S ribosomal protein L25 OS=Pseudomonas fluorescens (strain Pf0-1) GN=rplY PE=1 SV=1	14.7572	14.3875	13.9581	13.1397
PputA514_2740	Glucose starvation-inducible protein B OS=Bacillus subtilis (strain 168) GN=gsiB PE=1 SV=3	11.3978	0	14.5026	13.135
PputA514_6060	Cold shock protein CapA (Fragment) OS=Pseudomonas fragi GN=capA PE=2 SV=1	14.8008	13.9345	14.8498	13.1144
PputA514_0861	Succinyl-CoA ligase [ADP-forming] subunit beta OS=Pseudomonas fluorescens (strain Pf-5 / ATCC BAA-477) GN=sucC PE=3 SV=1	12.7173	14.4175	13.1607	13.1106
PputA514_4084	Probable sugar-binding periplasmic protein OS=Rhizobium meliloti (strain 1021) GN=R03301 PE=3 SV=1	15.5204	10.5039	11.8117	13.096
PputA514_5335	Putative rhizopine-binding protein OS=Rhizobium meliloti GN=mocB PE=3 SV=1	11.657	12.1103	13.536	13.082
PputA514_0644	Vanillate O-demethylase oxygenase subunit OS=Pseudomonas sp. (strain HR199 / DSM 7063) GN=vanA PE=3 SV=1	0	13.9714	12.2119	13.0718
PputA514_5561	Dehydrogenase/reductase SDR family member 4 OS=Bos taurus GN=DHRS4 PE=2 SV=2	11.8397	11.35	12.3486	13.0712
PputA514_1704	DNA-binding protein HRm OS=Rhizobium meliloti (strain 1021) GN=hupB PE=1 SV=2	15.6285	15.5428	12.3622	13.0608
PputA514_4582	Ketol-acid reductoisomerase OS=Pseudomonas fluorescens (strain SBW25) GN=ilvC PE=3 SV=1	12.3682	13.8029	13.2243	13.0418
PputA514_1922	30S ribosomal protein S9 OS=Pseudomonas fluorescens (strain SBW25) GN=rpsI PE=3 SV=1	13.2935	13.8808	13.3166	13.0085
PputA514_2980	Probable chaperone protein HSP31 OS=Saccharomyces cerevisiae (strain ATCC 204508 / S288c) GN=HSP31 PE=1 SV=1	11.6343	10.3652	12.9744	13.0041
PputA514_1033	30S ribosomal protein S1 OS=Pseudomonas aeruginosa (strain ATCC 15692 / PAO1 / 1C / PRS 101 / LMG 12228) GN=rpsA PE=3 SV=1	12.4986	12.7616	13.2054	12.9803
PputA514_3274	Copper resistance protein C OS=Escherichia coli GN=pcoC PE=1 SV=1	9.88347	8.63613	9.66635	12.9514
PputA514_1467	Enolase OS=Pseudomonas fluorescens (strain Pf0-1) GN=eno PE=1 SV=1	14.3543	14.0849	12.9189	12.9322
PputA514_5460	-	13.5484	12.1058	14.6387	12.9282
PputA514_1944	Porin D OS=Pseudomonas aeruginosa (strain ATCC 15692 / PAO1 / 1C / PRS 101 / LMG 12228) GN=oprD PE=1 SV=1	12.2232	13.2217	12.7913	12.9184
PputA514_1380	Protocatechuate 3,4-dioxygenase beta chain OS=Burkholderia cepacia GN=pcaH PE=3 SV=1	7.89678	13.3925	13.4935	12.917
PputA514_4998	-	0	0	0	12.9153
PputA514_5688	50S ribosomal protein L9 OS=Pseudomonas fluorescens (strain SBW25) GN=rplI PE=3 SV=1	12.7128	13.8712	13.1531	12.9063
PputA514_4893	50S ribosomal protein L4 OS=Pseudomonas fluorescens (strain SBW25) GN=rplD PE=3 SV=1	11.9048	12.3804	12.5115	12.9046
PputA514_0317	Putrescine-binding periplasmic protein OS=Escherichia coli (strain K12) GN=potF PE=1 SV=3	12.3254	12.5743	13.1041	12.8917
PputA514_6369	Flagellar hook-length control protein OS=Salmonella typhimurium (strain LT2 / SGSC1412 / ATCC 700720) GN=fliK PE=1 SV=2	3.06947	0	6.5255	12.8655
PputA514_1545	NADPH dehydrogenase OS=Bacillus cereus subsp. cytotoxis (strain NVH 391-98) GN=namA PE=3 SV=1	11.877	11.1939	13.0278	12.8392
PputA514_5551	Aconitate hydratase 2 OS=Pseudomonas aeruginosa (strain ATCC 15692 / PAO1 / 1C / PRS 101 / LMG 12228) GN=acnB PE=3 SV=1	11.2834	13.2356	13.0993	12.8388
PputA514_0124	DNA-binding protein HU-alpha OS=Pseudomonas aeruginosa (strain ATCC 15692 / PAO1 / 1C / PRS 101 / LMG 12228) GN=hupA PE=3 SV=1	14.8445	14.2728	15.6616	12.8354
PputA514_3103	Isocitrate lyase OS=Escherichia coli (strain K12) GN=aceA PE=1 SV=1	8.75672	10.8088	12.1421	12.8345
PputA514_3423	Porin D OS=Pseudomonas aeruginosa (strain ATCC 15692 / PAO1 / 1C / PRS 101 / LMG 12228) GN=oprD PE=1 SV=1	13.3476	13.5243	13.2886	12.7988
PputA514_4888	30S ribosomal protein S3 OS=Pseudomonas syringae pv. syringae (strain B728a) GN=rpsC PE=3 SV=1	13.1841	13.748	13.4298	12.7984
PputA514_4876	30S ribosomal protein S5 OS=Pseudomonas fluorescens (strain SBW25) GN=rpsE PE=3 SV=1	14.9806	13.8086	12.3779	12.7956
PputA514_0303	Porin-like protein GalP OS=Pseudomonas putida (strain KT2440) GN=galP PE=3 SV=1	12.1753	13.4088	13.075	12.7956
PputA514_3298	Branched-chain-amino-acid aminotransferase OS=Haemophilus influenzae (strain ATCC 51907 / DSM 11121 / KW20 / Rd) GN=ilvE PE=3 SV=1	11.6603	12.0635	12.6778	12.7331
PputA514_1597	Probable peroxiredoxin OS=Buchnera aphidicola subsp. Schizaphis graminum (strain Sg) GN=BUsg_176 PE=3 SV=1	13.1994	14.003	12.0213	12.7234
PputA514_0860	Succinyl-CoA ligase [ADP-forming] subunit alpha OS=Pseudomonas aeruginosa (strain ATCC 15692 / PAO1 / 1C / PRS 101 / LMG 12228) GN=sucD PE=3 SV=2	12.5076	13.6922	13.3856	12.7169
PputA514_3901	Flagellar basal body rod protein FlgB OS=Salmonella typhimurium (strain LT2 / SGSC1412 / ATCC 700720) GN=flgB PE=1 SV=2	0	0	8.42344	12.7133
PputA514_0864	Dihydrolipoyllysine-residue succinyltransferase component of 2-oxoglutarate dehydrogenase complex OS=Pseudomonas aeruginosa (strain ATCC 15692 / PAO1 / 1C / PRS 101 / LMG 12228) GN=sucB PE=3 SV=1	12.3093	13.5252	13.1379	12.7044
PputA514_1185	Glyceraldehyde-3-phosphate dehydrogenase OS=Zymomonas mobilis subsp. mobilis (strain ATCC 31821 / ZM4 / CP4) GN=gap PE=3 SV=1	7.59128	12.447	12.4193	12.7026
PputA514_3474	Cystine-binding periplasmic protein OS=Escherichia coli (strain K12) GN=fliY PE=1 SV=1	13.2795	13.459	13.5063	12.6975
PputA514_1424	Outer membrane lipoprotein SlyB OS=Salmonella typhimurium (strain LT2 / SGSC1412 / ATCC 700720) GN=slyB PE=1 SV=1	12.9472	12.5451	12.0319	12.6499
PputA514_1941	Periplasmic dipeptide transport protein OS=Escherichia coli (strain K12) GN=dppA PE=1 SV=1	11.783	13.7698	13.447	12.6359
PputA514_4968	Uncharacterized protein YeaG OS=Escherichia coli (strain K12) GN=yeaG PE=3 SV=1	11.5802	12.1897	12.9499	12.6359
PputA514_4676	Catalase OS=Pseudomonas aeruginosa (strain ATCC 15692 / PAO1 / 1C / PRS 101 / LMG 12228) GN=katB PE=3 SV=1	0	0	11.674	12.6358
PputA514_0792	FKBP-type 22 kDa peptidyl-prolyl cis-trans isomerase OS=Shigella flexneri GN=fklB PE=3 SV=2	12.9245	13.0802	13.0531	12.6255
PputA514_4836	Outer membrane protein W OS=Vibrio cholerae serotype O1 (strain ATCC 39315 / El Tor Inaba N16961) GN=ompW PE=3 SV=2	15.426	13.881	10.9348	12.6227
PputA514_2767	Protein YciF OS=Escherichia coli (strain K12) GN=yciF PE=1 SV=1	15.2087	11.4097	15.3406	12.6161
PputA514_2620	4-oxalmesaconate hydratase OS=Pseudomonas putida (strain KT2440) GN=galB PE=1 SV=1	0	9.88244	13.2429	12.5907
PputA514_4509	Probable D-methionine-binding lipoprotein MetQ OS=Pasteurella multocida (strain Pm70) GN=metQ PE=3 SV=1	12.9267	11.601	12.8617	12.586
PputA514_0018	ATP synthase subunit alpha OS=Pseudomonas fluorescens (strain SBW25) GN=atpA PE=3 SV=1	13.4018	13.3547	12.9047	12.577
PputA514_3900	Flagellar basal-body rod protein FlgC OS=Salmonella typhimurium (strain LT2 / SGSC1412 / ATCC 700720) GN=flgC PE=1 SV=1	0	0	0	12.5661
PputA514_4996	Acyl-CoA dehydrogenase OS=Bacillus subtilis (strain 168) GN=mmgC PE=2 SV=3	7.94294	9.64303	12.0434	12.5435
PputA514_4976	30S ribosomal protein S21 OS=Pseudomonas syringae pv. syringae (strain B728a) GN=rpsU PE=3 SV=1	11.3601	10.9052	11.8505	12.5416
PputA514_4887	50S ribosomal protein L16 OS=Pseudomonas fluorescens (strain SBW25) GN=rplP PE=3 SV=1	13.8462	13.4671	11.5677	12.5154
PputA514_2756	Probable manganese catalase OS=Clostridium acetobutylicum (strain ATCC 824 / DSM 792 / JCM 1419 / LMG 5710 / VKM B-1787) GN=CA_C2800 PE=3 SV=1	10.9581	7.06286	12.7437	12.5135
PputA514_4617	Polyribonucleotide nucleotidyltransferase OS=Pseudomonas fluorescens (strain SBW25) GN=pnp PE=3 SV=1	12.0076	12.6639	12.2898	12.5011
PputA514_4875	50S ribosomal protein L30 OS=Pseudomonas fluorescens (strain Pf0-1) GN=rpmD PE=3 SV=1	11.0407	10.697	11.97	12.4985
PputA514_5703	RNA-binding protein Hfq OS=Pseudomonas fluorescens (strain Pf-5 / ATCC BAA-477) GN=hfq PE=3 SV=1	14.1255	12.2399	14.2782	12.4869
PputA514_4884	50S ribosomal protein L14 OS=Pseudomonas syringae pv. syringae (strain B728a) GN=rplN PE=3 SV=1	12.2414	12.5279	11.8813	12.464
PputA514_0863	Dihydrolipoyllysine-residue succinyltransferase component of 2-oxoglutarate dehydrogenase complex (Fragment) OS=Pseudomonas putida GN=sucB PE=3 SV=2	5.41665	0	13.0141	12.4432
PputA514_3408	ABC transporter arginine-binding protein 1 OS=Escherichia coli (strain K12) GN=artJ PE=1 SV=2	12.5887	12.0427	12.9455	12.4363
PputA514_4406	Artemisinic aldehyde Delta(11(13)) reductase OS=Artemisia annua GN=DBR2 PE=1 SV=1	8.92284	9.61438	11.8437	12.4251
PputA514_4904	50S ribosomal protein L1 OS=Pseudomonas fluorescens (strain SBW25) GN=rplA PE=3 SV=1	13.9706	14.1221	13.0608	12.3808
PputA514_1454	Cold shock protein CapB OS=Pseudomonas syringae pv. tomato (strain DC3000) GN=capB PE=3 SV=1	14.1767	13.2874	12.3917	12.3795
PputA514_4668	Serine hydroxymethyltransferase 1 OS=Pseudomonas syringae pv. phaseolicola (strain 1448A / Race 6) GN=glyA1 PE=3 SV=1	11.6763	11.6242	11.6522	12.3696
PputA514_4868	50S ribosomal protein L17 OS=Pseudomonas fluorescens (strain SBW25) GN=rplQ PE=3 SV=1	14.0269	12.9215	12.0962	12.3482
PputA514_1382	3-oxoadipate CoA-transferase subunit B OS=Pseudomonas sp. (strain B13) GN=catJ PE=1 SV=1	0	13.6131	11.8197	12.3413
PputA514_5691	30S ribosomal protein S6 OS=Pseudomonas fluorescens (strain SBW25) GN=rpsF PE=3 SV=1	12.4853	12.519	12.6088	12.3313
PputA514_5346	-	8.60228	0	12.7984	12.2728
PputA514_1201	Fatty acid oxidation complex subunit alpha OS=Pseudomonas fluorescens (strain SBW25) GN=fadB PE=3 SV=1	9.7236	10.5888	12.792	12.2683
PputA514_0871	Citrate synthase OS=Pseudomonas aeruginosa (strain ATCC 15692 / PAO1 / 1C / PRS 101 / LMG 12228) GN=gltA PE=3 SV=2	11.7317	12.7503	12.1895	12.2677
PputA514_1945	Periplasmic dipeptide transport protein OS=Escherichia coli (strain K12) GN=dppA PE=1 SV=1	11.919	12.0275	12.9541	12.2651
PputA514_0208	Nitrogen regulatory protein P-II 2 OS=Shigella flexneri GN=glnK PE=3 SV=1	13.4985	12.9041	13.0362	12.2566
PputA514_3251	ATP-dependent Clp protease ATP-binding subunit ClpX OS=Pseudomonas fluorescens (strain SBW25) GN=clpX PE=3 SV=1	12.5076	12.5261	12.1564	12.2425
PputA514_4623	Transcription termination/antitermination protein NusA OS=Salmonella typhimurium (strain LT2 / SGSC1412 / ATCC 700720) GN=nusA PE=3 SV=2	12.2059	11.6385	12.4748	12.2378
PputA514_4079	Porin B OS=Pseudomonas aeruginosa (strain ATCC 15692 / PAO1 / 1C / PRS 101 / LMG 12228) GN=oprB PE=1 SV=1	16.6285	11.9306	12.1693	12.2343
PputA514_2020	FKBP-type peptidyl-prolyl cis-trans isomerase SlyD OS=Haemophilus influenzae (strain ATCC 51907 / DSM 11121 / KW20 / Rd) GN=slyD PE=3 SV=1	13.2847	12.3385	12.0034	12.2285
PputA514_4047	-	0	0	0	12.2274
PputA514_4403	Glucosaminate ammonia-lyase OS=Pseudomonas fluorescens PE=1 SV=2	9.36419	10.4843	12.2005	12.2085
PputA514_4895	30S ribosomal protein S10 OS=Pseudomonas stutzeri (strain A1501) GN=rpsJ PE=3 SV=1	12.9398	13.105	13.0704	12.202
PputA514_1593	Argininosuccinate synthase OS=Pseudomonas fluorescens (strain SBW25) GN=argG PE=3 SV=1	11.5825	12.4658	11.7495	12.1937
PputA514_0834	Putative NADP-dependent oxidoreductase YfmJ OS=Bacillus subtilis (strain 168) GN=yfmJ PE=2 SV=1	0	0	12.5732	12.1849
PputA514_0970	Elongation factor P OS=Pseudomonas fluorescens (strain SBW25) GN=efp PE=3 SV=1	12.7062	13.4858	13.406	12.1735
PputA514_2616	Glutathione-independent formaldehyde dehydrogenase OS=Pseudomonas putida GN=fdhA PE=1 SV=3	0	9.92963	12.7847	12.1689
PputA514_1853	lipoprotein	12.4345	12.8979	12.9242	12.1671
PputA514_5690	30S ribosomal protein S18 OS=Pseudomonas syringae pv. syringae (strain B728a) GN=rpsR PE=3 SV=1	13.484	10.7443	11.656	12.1653
PputA514_6070	D-ribose-binding periplasmic protein OS=Salmonella typhimurium (strain LT2 / SGSC1412 / ATCC 700720) GN=rbsB PE=1 SV=1	11.9333	12.1498	11.4942	12.163
PputA514_4260	50S ribosomal protein L19 OS=Pseudomonas fluorescens (strain Pf0-1) GN=rplS PE=3 SV=1	14.3698	13.8595	13.0231	12.1621
PputA514_3978	Lysine-arginine-ornithine-binding periplasmic protein OS=Escherichia coli (strain K12) GN=argT PE=1 SV=3	11.5135	12.1457	12.38	12.1468
PputA514_1838	hypothetical protein	9.3983	10.9748	12.4208	12.136
PputA514_1573	-	0	4.30189	0	12.1027
PputA514_5698	Adenylosuccinate synthetase OS=Pseudomonas fluorescens (strain SBW25) GN=purA PE=3 SV=1	11.6956	12.6936	11.7185	12.0953
PputA514_5188	Thiol peroxidase OS=Shigella flexneri GN=tpx PE=3 SV=2	12.2036	6.20311	13.1211	12.0718
PputA514_4306	2-isopropylmalate synthase OS=Pseudomonas fluorescens (strain SBW25) GN=leuA PE=3 SV=1	10.9616	11.2884	10.7154	12.0582
PputA514_5095	Fructose-bisphosphate aldolase OS=Pseudomonas aeruginosa (strain ATCC 15692 / PAO1 / 1C / PRS 101 / LMG 12228) GN=fba PE=3 SV=1	11.4202	12.1872	12.1471	12.0501
PputA514_0650	Vanillin dehydrogenase OS=Pseudomonas fluorescens GN=vdh PE=3 SV=1	2.93936	9.41809	12.0017	12.0352
PputA514_0854	Uncharacterized protein K02A2.1 OS=Caenorhabditis elegans GN=K02A2.1 PE=4 SV=2	11.2773	11.2703	11.3463	12.0115
PputA514_4319	Nucleoside diphosphate kinase OS=Pseudomonas fluorescens (strain SBW25) GN=ndk PE=3 SV=1	15.4116	14.5083	12.9341	11.9932
PputA514_0178	50S ribosomal protein L28 OS=Pseudomonas fluorescens (strain SBW25) GN=rpmB PE=3 SV=1	12.7928	13.1706	12.7272	11.9915
PputA514_4898	30S ribosomal protein S7 OS=Pseudomonas fluorescens (strain SBW25) GN=rpsG PE=3 SV=1	13.2714	13.1589	12.6189	11.9859
PputA514_3436	Uncharacterized protein YgaU OS=Escherichia coli (strain K12) GN=ygaU PE=1 SV=2	11.8208	11.4501	13.03	11.9764
PputA514_4493	Thiol:disulfide interchange protein DsbA OS=Pseudomonas syringae pv. tomato (strain DC3000) GN=dsbA PE=3 SV=1	12.6499	12.3344	11.6431	11.9754
PputA514_6388	Flagellar hook-associated protein 3 OS=Salmonella typhimurium (strain LT2 / SGSC1412 / ATCC 700720) GN=flgL PE=1 SV=1	4.30577	4.09654	0	11.9544
PputA514_0851	3-oxoacyl-[acyl-carrier-protein] synthase 1 OS=Haemophilus influenzae (strain ATCC 51907 / DSM 11121 / KW20 / Rd) GN=fabB PE=3 SV=1	10.7162	12.0853	11.4981	11.9515
PputA514_5826	NADP-dependent malic enzyme OS=Escherichia coli (strain K12) GN=maeB PE=1 SV=1	12.3664	12.3976	12.1952	11.9472
PputA514_3814	Electron transfer flavoprotein subunit beta OS=Pseudomonas aeruginosa (strain ATCC 15692 / PAO1 / 1C / PRS 101 / LMG 12228) GN=etfB PE=3 SV=1	12.1679	12.1334	12.1248	11.9412
PputA514_3252	ATP-dependent Clp protease proteolytic subunit OS=Pseudomonas fluorescens (strain SBW25) GN=clpP PE=3 SV=1	10.2213	11.0141	12.4727	11.9278
PputA514_4871	30S ribosomal protein S11 OS=Pseudomonas syringae pv. syringae (strain B728a) GN=rpsK PE=3 SV=1	12.7887	12.835	10.3503	11.9229
PputA514_5838	-	13.1317	13.1496	12.8584	11.9014
PputA514_3329	-	7.19931	8.16298	8.49704	11.8951
PputA514_1203	Universal stress protein A homolog 1 OS=Coxiella burnetii (strain RSA 493 / Nine Mile phase I) GN=uspA1 PE=3 SV=1	11.8179	12.4145	13.0639	11.8873
PputA514_1570	-	0	8.06627	7.82436	11.8715
PputA514_1255	Uncharacterized protein YwnB OS=Bacillus subtilis (strain 168) GN=ywnB PE=4 SV=1	10.5947	10.2511	12.0334	11.8567
PputA514_1560	Protein RecA OS=Pseudomonas fluorescens GN=recA PE=3 SV=1	10.6648	11.5125	9.82576	11.8473
PputA514_4184	-	12.6701	13.0873	12.3865	11.8431
PputA514_4584	Acetolactate synthase isozyme 3 large subunit OS=Escherichia coli (strain K12) GN=ilvI PE=1 SV=2	11.1439	11.276	11.7854	11.8415
PputA514_5010	Malate synthase G OS=Pseudomonas fluorescens GN=glcB PE=1 SV=1	8.60152	11.3735	11.7541	11.8265
PputA514_1521	Adenylate kinase OS=Pseudomonas fluorescens (strain SBW25) GN=adk PE=3 SV=1	12.8785	12.9308	12.5978	11.8117
PputA514_4134	-	6.73096	3.09925	3.92011	11.7924
PputA514_4385	Peroxisomal multifunctional enzyme type 2 OS=Rattus norvegicus GN=Hsd17b4 PE=1 SV=3	3.35478	0	11.0975	11.7924
PputA514_4889	50S ribosomal protein L22 OS=Pseudomonas putida (strain W619) GN=rplV PE=3 SV=1	13.4582	13.5032	13.1074	11.7744
PputA514_4903	50S ribosomal protein L10 OS=Pseudomonas fluorescens (strain SBW25) GN=rplJ PE=3 SV=1	15.3347	14.2023	14.0055	11.7695
PputA514_0867	Succinate dehydrogenase flavoprotein subunit OS=Escherichia coli (strain K12) GN=sdhA PE=1 SV=1	12.3613	14.2727	12.1878	11.7634
PputA514_1804	UDP-3-O-[3-hydroxymyristoyl] N-acetylglucosamine deacetylase OS=Pseudomonas fluorescens (strain SBW25) GN=lpxC PE=3 SV=1	11.0363	10.7262	11.1345	11.761
PputA514_1186	glyceraldehyde-3-phosphate dehydrogenase	4.71461	12.0953	12.2189	11.7545
PputA514_1463	S-(hydroxymethyl)glutathione dehydrogenase OS=Synechocystis sp. (strain PCC 6803 / Kazusa) GN=frmA PE=3 SV=1	4.29567	13.1577	11.9521	11.7459
PputA514_1915	-	0	0	0	11.7427
PputA514_4881	50S ribosomal protein L5 OS=Pseudomonas fluorescens (strain Pf0-1) GN=rplE PE=3 SV=1	12.8609	13.2287	12.7934	11.7346
PputA514_5032	Glutathione-independent formaldehyde dehydrogenase OS=Pseudomonas putida GN=fdhA PE=1 SV=3	7.55088	10.2306	12.1082	11.7238
PputA514_5581	6-phosphogluconolactonase OS=Bacillus subtilis (strain 168) GN=pgl PE=1 SV=1	10.7471	10.3476	11.1966	11.7204
PputA514_4883	50S ribosomal protein L24 OS=Pseudomonas fluorescens (strain SBW25) GN=rplX PE=3 SV=1	12.3269	11.2668	13.0979	11.7188
PputA514_0982	Major outer membrane lipoprotein OS=Pseudomonas aeruginosa (strain ATCC 15692 / PAO1 / 1C / PRS 101 / LMG 12228) GN=oprI PE=3 SV=1	14.999	12.9495	6.49337	11.7147
PputA514_4890	30S ribosomal protein S19 OS=Pseudomonas syringae pv. syringae (strain B728a) GN=rpsS PE=3 SV=1	13.1701	10.9509	13.305	11.7039
PputA514_1286	Probable periplasmic serine endoprotease DegP-like OS=Pseudomonas fluorescens (strain Pf-5 / ATCC BAA-477) GN=mucD PE=1 SV=1	11.6109	11.7677	12.256	11.703
PputA514_4877	50S ribosomal protein L18 OS=Pseudomonas fluorescens (strain SBW25) GN=rplR PE=3 SV=1	13.1096	13.3576	11.4041	11.6978
PputA514_3806	Uncharacterized protein PA1579 OS=Pseudomonas aeruginosa (strain ATCC 15692 / PAO1 / 1C / PRS 101 / LMG 12228) GN=PA1579 PE=4 SV=1	10.1848	9.4889	10.8582	11.6955
PputA514_3497	Probable D-methionine-binding lipoprotein MetQ OS=Pasteurella multocida (strain Pm70) GN=metQ PE=3 SV=1	12.9612	12.0274	11.6014	11.6927
PputA514_4538	Peroxiredoxin OsmC OS=Shigella flexneri GN=osmC PE=3 SV=2	10.6467	9.2988	10.8493	11.6721
PputA514_4542	Uncharacterized protein YqjD OS=Shigella flexneri GN=yqjD PE=3 SV=1	14.561	12.4588	13.3908	11.6703
PputA514_1381	Beta-ketoadipyl-CoA thiolase OS=Pseudomonas putida GN=pcaF PE=3 SV=1	7.25479	13.5751	11.0396	11.6608
PputA514_4872	30S ribosomal protein S13 OS=Pseudomonas fluorescens (strain SBW25) GN=rpsM PE=3 SV=1	11.6587	12.8865	11.1063	11.6478
PputA514_4583	Acetolactate synthase isozyme 3 small subunit OS=Salmonella typhimurium (strain LT2 / SGSC1412 / ATCC 700720) GN=ilvH PE=3 SV=2	12.2912	12.1227	12.6065	11.6142
PputA514_0657	-	0	15.2192	12.5525	11.582
PputA514_4901	DNA-directed RNA polymerase subunit beta OS=Pseudomonas fluorescens (strain SBW25) GN=rpoB PE=3 SV=1	11.1589	12.2747	11.9716	11.5725
PputA514_0868	Succinate dehydrogenase flavoprotein subunit OS=Salmonella typhimurium (strain LT2 / SGSC1412 / ATCC 700720) GN=sdhA PE=3 SV=1	10.5702	12.1344	12.1325	11.5578
PputA514_0658	Benzaldehyde dehydrogenase [NAD(+)] OS=Pseudomonas putida GN=xylC PE=1 SV=1	0	14.1498	12.2648	11.5561
PputA514_6478	Peptidyl-prolyl cis-trans isomerase A OS=Pseudomonas aeruginosa (strain ATCC 15692 / PAO1 / 1C / PRS 101 / LMG 12228) GN=ppiA PE=3 SV=2	12.9371	11.3988	11.1961	11.5554
PputA514_4585	Acetolactate synthase large subunit OS=Buchnera aphidicola subsp. Baizongia pistaciae (strain Bp) GN=ilvI PE=3 SV=1	10.1325	10.6415	11.5406	11.5523
PputA514_6390	Peptidoglycan hydrolase FlgJ OS=Pseudomonas aeruginosa (strain ATCC 15692 / PAO1 / 1C / PRS 101 / LMG 12228) GN=flgJ PE=3 SV=1	0	0	0	11.5465
PputA514_6389	Flagellar hook-associated protein 1 OS=Escherichia coli (strain K12) GN=flgK PE=3 SV=3	2.77066	0	0	11.5455
PputA514_2304	Alkyl hydroperoxide reductase subunit F OS=Pseudomonas aeruginosa (strain ATCC 15692 / PAO1 / 1C / PRS 101 / LMG 12228) GN=ahpF PE=3 SV=1	0	7.80196	9.9251	11.5423
PputA514_4874	50S ribosomal protein L15 OS=Pseudomonas fluorescens (strain SBW25) GN=rplO PE=3 SV=1	11.5261	12.6726	11.0946	11.5371
PputA514_3791	Enoyl-CoA delta isomerase 1, mitochondrial OS=Homo sapiens GN=ECI1 PE=1 SV=1	10.4103	10.3705	12.0375	11.511
PputA514_4633	Carbamoyl-phosphate synthase large chain OS=Pseudomonas syringae pv. tomato (strain DC3000) GN=carB PE=3 SV=1	11.4659	10.4088	11.6525	11.5079
PputA514_4934	N-acetyl-gamma-glutamyl-phosphate reductase OS=Pseudomonas fluorescens (strain SBW25) GN=argC PE=3 SV=1	9.50978	10.3826	10.8171	11.5042
PputA514_1495	2,3,4,5-tetrahydropyridine-2,6-dicarboxylate N-succinyltransferase OS=Pseudomonas aeruginosa (strain PA7) GN=dapD PE=3 SV=1	11.6689	11.8821	11.4917	11.5024
PputA514_2307	hypothetical protein	13.4862	12.8626	13.0599	11.4961
PputA514_0779	extracellular solute-binding protein	10.5751	10.4976	11.3683	11.4827
PputA514_4560	Quinone oxidoreductase OS=Pseudomonas aeruginosa (strain ATCC 15692 / PAO1 / 1C / PRS 101 / LMG 12228) GN=qor PE=3 SV=2	11.5534	11.6206	11.4238	11.4787
PputA514_5768	Dihydrolipoyllysine-residue acetyltransferase component of pyruvate dehydrogenase complex OS=Pseudomonas aeruginosa (strain ATCC 15692 / PAO1 / 1C / PRS 101 / LMG 12228) GN=aceF PE=1 SV=2	13.0489	11.3247	11.5853	11.4696
PputA514_5113	Adenosylhomocysteinase OS=Pseudomonas fluorescens (strain SBW25) GN=ahcY PE=3 SV=1	11.1256	11.8492	11.5186	11.4672
PputA514_5994	Biotin carboxyl carrier protein of acetyl-CoA carboxylase OS=Pseudomonas aeruginosa (strain ATCC 15692 / PAO1 / 1C / PRS 101 / LMG 12228) GN=accB PE=3 SV=1	13.972	12.073	11.0502	11.4596
PputA514_3602	Outer membrane efflux protein BepC OS=Brucella suis biovar 1 (strain 1330) GN=bepC PE=1 SV=1	12.2689	12.2355	11.2695	11.4519
PputA514_0079	Pyruvate carboxylase subunit B OS=Methanocaldococcus jannaschii (strain ATCC 43067 / DSM 2661 / JAL-1 / JCM 10045 / NBRC 100440) GN=pycB PE=1 SV=1	11.0865	10.4238	10.9431	11.4364
PputA514_3468	L-glyceraldehyde 3-phosphate reductase OS=Escherichia coli O157:H7 GN=gpr PE=3 SV=1	12.6743	11.346	11.6579	11.4293
PputA514_1901	Rod shape-determining protein MreB OS=Shigella flexneri GN=mreB PE=3 SV=1	10.3665	11.5185	10.7745	11.4276
PputA514_4215	Glyceraldehyde-3-phosphate dehydrogenase OS=Pseudomonas aeruginosa (strain ATCC 15692 / PAO1 / 1C / PRS 101 / LMG 12228) GN=gap PE=3 SV=3	14.3956	10.3137	9.31014	11.4232
PputA514_1569	-	0	4.82489	3.86593	11.419
PputA514_2352	Bifunctional polymyxin resistance protein ArnA OS=Pseudomonas fluorescens (strain SBW25) GN=arnA PE=3 SV=1	10.9995	11.0518	11.8303	11.4032
PputA514_1923	50S ribosomal protein L13 OS=Pseudomonas fluorescens (strain SBW25) GN=rplM PE=3 SV=1	14.1375	13.6032	13.3727	11.3858
PputA514_0609	extracellular solute-binding protein	6.92623	11.5425	12.0559	11.3851
PputA514_1946	Periplasmic dipeptide transport protein OS=Escherichia coli (strain K12) GN=dppA PE=1 SV=1	11.0149	11.4663	11.4549	11.3746
PputA514_3524	5-aminovalerate aminotransferase DavT OS=Pseudomonas putida (strain KT2440) GN=davT PE=1 SV=1	9.23758	10.0437	11.9699	11.3702
PputA514_3525	Glutarate-semialdehyde dehydrogenase DavD OS=Pseudomonas putida (strain KT2440) GN=davD PE=3 SV=1	10.4936	10.9216	10.9726	11.3695
PputA514_4879	30S ribosomal protein S8 OS=Pseudomonas fluorescens (strain SBW25) GN=rpsH PE=3 SV=1	11.581	10.7623	12.1178	11.3662
PputA514_0645	Vanillate O-demethylase oxidoreductase OS=Pseudomonas putida GN=vanB PE=3 SV=1	0	11.8418	11.5467	11.3631
PputA514_0653	Porin-like protein GalP OS=Pseudomonas putida (strain KT2440) GN=galP PE=3 SV=1	0	4.67137	11.2225	11.3474
PputA514_1599	Bacterioferritin OS=Azotobacter vinelandii GN=bfr PE=1 SV=2	12.9043	12.0372	12.7923	11.3413
PputA514_3906	-	9.65718	0	4.69897	11.3355
PputA514_4505	Catalase HPII OS=Pseudomonas putida GN=katE PE=3 SV=1	10.546	8.32316	12.1734	11.3354
PputA514_0138	EvpB family type VI secretion protein	11.1945	9.63873	11.6737	11.3319
PputA514_2991	Aldose 1-epimerase OS=Acinetobacter calcoaceticus GN=mro PE=1 SV=1	9.80987	9.54221	11.7192	11.3266
PputA514_0003	DNA polymerase III subunit beta OS=Pseudomonas putida GN=dnaN PE=3 SV=1	9.2697	9.19631	10.7021	11.3191
PputA514_3242	2,4-dienoyl-CoA reductase [NADPH] OS=Escherichia coli (strain K12) GN=fadH PE=1 SV=3	8.18754	7.74592	11.1357	11.3154
PputA514_4460	NAD(P) transhydrogenase subunit alpha part 1 OS=Rhodospirillum rubrum GN=pntAA PE=3 SV=1	9.2241	9.46541	10.7032	11.3052
PputA514_1880	Lipopolysaccharide export system protein LptA OS=Shigella flexneri GN=lptA PE=3 SV=1	13.2357	11.7433	11.8168	11.3027
PputA514_4405	-	0	0	5.96576	11.2973
PputA514_1942	Periplasmic dipeptide transport protein OS=Escherichia coli (strain K12) GN=dppA PE=1 SV=1	9.74668	11.5225	12.0083	11.2953
PputA514_0935	hypothetical protein	14.0739	13.7448	12.1044	11.2908
PputA514_4900	DNA-directed RNA polymerase subunit beta' OS=Pseudomonas fluorescens (strain SBW25) GN=rpoC PE=3 SV=1	11.1216	12.3564	11.4496	11.2886
PputA514_2779	-	11.1217	0	11.1378	11.2836
PputA514_4777	Aldehyde dehydrogenase OS=Deinococcus radiodurans (strain ATCC 13939 / DSM 20539 / JCM 16871 / LMG 4051 / NBRC 15346 / NCIMB 9279 / R1 / VKM B-1422) GN=aldA PE=3 SV=1	9.8162	12.3235	11.8911	11.2831
PputA514_4158	Aspartate--tRNA ligase OS=Pseudomonas fluorescens (strain SBW25) GN=aspS PE=3 SV=1	10.5759	11.7686	11.3647	11.2765
PputA514_0263	Transcription termination factor Rho OS=Pseudomonas fluorescens biotype C GN=rho PE=3 SV=1	11.2697	11.0721	5.685	11.2754
PputA514_0651	Hydroxycinnamoyl-CoA hydratase-lyase OS=Pseudomonas fluorescens PE=1 SV=1	0	8.8999	11.4676	11.2695
PputA514_3095	Isocitrate dehydrogenase [NADP] OS=Azotobacter vinelandii GN=icd PE=1 SV=5	12.6855	13.2832	10.39	11.269
PputA514_0874	Glycine betaine-binding protein OpuAC OS=Bacillus subtilis (strain 168) GN=opuAC PE=1 SV=1	0	4.36529	11.0211	11.2563
PputA514_4665	Uncharacterized ABC transporter ATP-binding protein HI_1252 OS=Haemophilus influenzae (strain ATCC 51907 / DSM 11121 / KW20 / Rd) GN=HI_1252 PE=1 SV=1	8.99678	10.6401	11.2876	11.254
PputA514_4947	Esterase EstA OS=Pseudomonas putida GN=estA PE=3 SV=1	10.8311	11.3835	11.9024	11.2465
PputA514_0261	Thioredoxin OS=Pseudomonas aeruginosa (strain ATCC 15692 / PAO1 / 1C / PRS 101 / LMG 12228) GN=trxA PE=3 SV=1	13.0764	13.5124	12.0132	11.2413
PputA514_4332	Inositol-1-monophosphatase OS=Pseudomonas aeruginosa (strain ATCC 15692 / PAO1 / 1C / PRS 101 / LMG 12228) GN=suhB PE=3 SV=1	10.2202	11.5743	11.5425	11.2333
PputA514_4622	Transcription termination/antitermination protein NusA OS=Shigella flexneri GN=nusA PE=3 SV=1	11.113	11.1286	10.8956	11.2267
PputA514_1673	Peptidoglycan deacetylase OS=Helicobacter pylori (strain G27) GN=pgdA PE=1 SV=1	0	7.0727	12.1089	11.2218
PputA514_5098	Phosphoglycerate kinase OS=Pseudomonas fluorescens (strain SBW25) GN=pgk PE=3 SV=1	10.9023	10.6405	11.4279	11.2192
PputA514_0637	Lysine-arginine-ornithine-binding periplasmic protein OS=Salmonella typhimurium (strain LT2 / SGSC1412 / ATCC 700720) GN=argT PE=1 SV=2	8.46159	10.3141	10.8909	11.218
PputA514_5236	47 kDa outer membrane protein OS=Pasteurella multocida (strain Pm70) GN=PM1069 PE=1 SV=1	6.48572	8.15695	10.8523	11.2139
PputA514_5610	Putative 6-phosphogluconate dehydrogenase YqeC OS=Bacillus subtilis (strain 168) GN=yqeC PE=3 SV=1	11.5557	11.5158	12.1346	11.1988
PputA514_3971	Acetylornithine aminotransferase 1 OS=Pseudomonas syringae pv. tomato (strain DC3000) GN=argD1 PE=3 SV=1	10.5068	11.1527	11.3031	11.1889
PputA514_0342	D-3-phosphoglycerate dehydrogenase OS=Shigella flexneri GN=serA PE=3 SV=2	10.7311	11.6624	11.5722	11.1821
PputA514_4944	Indole-3-glycerol phosphate synthase OS=Pseudomonas fluorescens (strain SBW25) GN=trpC PE=3 SV=1	9.57219	10.277	11.3022	11.1813
PputA514_3660	NADPH-dependent curcumin reductase OS=Escherichia coli (strain K12) GN=curA PE=1 SV=3	9.05736	7.99721	10.8318	11.1682
PputA514_4298	Inosine-5'-monophosphate dehydrogenase OS=Acinetobacter calcoaceticus GN=guaB PE=3 SV=1	10.9362	11.6326	10.0844	11.1614
PputA514_4939	Histidine triad nucleotide-binding protein 1 OS=Bos taurus GN=HINT1 PE=1 SV=2	12.5669	5.79866	12.2151	11.1584
PputA514_4639	Protein GrpE OS=Pseudomonas fluorescens (strain SBW25) GN=grpE PE=3 SV=1	13.2419	12.2825	12.1508	11.155
PputA514_6105	3-isopropylmalate dehydratase small subunit OS=Pseudomonas fluorescens (strain Pf-5 / ATCC BAA-477) GN=leuD PE=3 SV=1	11.4163	11.7321	11.7122	11.1471
PputA514_5192	Trehalose/maltose-binding protein MalE OS=Thermococcus litoralis GN=malE PE=1 SV=1	3.59229	9.44174	10.8465	11.1465
PputA514_5442	Major cell-binding factor OS=Campylobacter jejuni subsp. jejuni serotype O:2 (strain NCTC 11168) GN=peb1A PE=1 SV=1	9.53126	10.4376	11.7947	11.1385
PputA514_2986	Disulfide-bond oxidoreductase YghU OS=Escherichia coli (strain K12) GN=yghU PE=1 SV=2	10.488	10.2181	5.47712	11.1289
PputA514_0866	Succinate dehydrogenase iron-sulfur subunit OS=Salmonella typhimurium (strain LT2 / SGSC1412 / ATCC 700720) GN=sdhB PE=3 SV=2	12.2012	12.104	11.785	11.1176
PputA514_3449	Phosphoenolpyruvate carboxykinase [ATP] OS=Pseudomonas fluorescens (strain SBW25) GN=pckA PE=3 SV=1	10.8217	12.1428	11.0014	11.1126
PputA514_4296	GMP synthase [glutamine-hydrolyzing] OS=Pseudomonas fluorescens (strain SBW25) GN=guaA PE=3 SV=1	9.87917	10.4401	11.3678	11.111
PputA514_4570	Glycine--tRNA ligase alpha subunit OS=Pseudomonas fluorescens (strain Pf0-1) GN=glyQ PE=3 SV=1	9.43123	10.0829	10.6549	11.1109
PputA514_3190	Peptidyl-prolyl cis-trans isomerase cyp18 OS=Streptomyces antibioticus GN=cyp18 PE=1 SV=3	13.0352	11.9562	9.70152	11.1097
PputA514_4641	Ferric uptake regulation protein (Fragment) OS=Pseudomonas fluorescens GN=fur PE=3 SV=1	12.1381	10.9699	12.6639	11.1072
PputA514_2734	Uncharacterized oxidoreductase YhdF OS=Bacillus subtilis (strain 168) GN=yhdF PE=3 SV=1	9.53129	0	11.7713	11.1059
PputA514_4195	Pyruvate kinase II OS=Escherichia coli (strain K12) GN=pykA PE=1 SV=3	11.7058	11.6934	11.1327	11.1015
PputA514_5654	Bacterioferritin OS=Brucella suis biovar 1 (strain 1330) GN=bfr PE=3 SV=1	13.2833	11.1568	13.8253	11.0996
PputA514_1924	Protein tas OS=Shigella flexneri GN=tas PE=3 SV=1	11.0222	10.97	10.4186	11.0967
PputA514_2133	Putative uncharacterized protein YghX OS=Escherichia coli (strain K12) GN=yghX PE=5 SV=3	10.8085	11.0159	10.5882	11.0962
PputA514_4411	50S ribosomal protein L27 OS=Pseudomonas fluorescens (strain SBW25) GN=rpmA PE=3 SV=1	13.1702	14.3361	12.7518	11.0786
PputA514_3661	Nucleoid-associated protein PFLU_4577 OS=Pseudomonas fluorescens (strain SBW25) GN=PFLU_4577 PE=3 SV=1	14.5205	13.0288	11.594	11.0706
PputA514_2341	Probable enoyl-CoA hydratase OS=Rhizobium meliloti (strain 1021) GN=fadB1 PE=3 SV=2	11.1911	11.7523	11.128	11.0649
PputA514_3203	Acyl-CoA dehydrogenase family member 10 OS=Mus musculus GN=Acad10 PE=1 SV=1	3.63839	0	9.94826	11.0626
PputA514_4416	FKBP-type 22 kDa peptidyl-prolyl cis-trans isomerase OS=Shigella flexneri GN=fklB PE=3 SV=2	13.2464	13.9592	11.0865	11.052
PputA514_3722	2-methylcitrate synthase OS=Escherichia coli (strain K12) GN=prpC PE=1 SV=2	9.68882	10.0892	11.4137	11.0425
PputA514_3457	Transcriptional regulatory protein OmpR OS=Shigella flexneri GN=ompR PE=3 SV=1	10.2486	11.0867	10.4432	11.0372
PputA514_5884	GTP-binding protein TypA/BipA OS=Shigella flexneri GN=typA PE=3 SV=1	10.6169	11.1571	11.0912	11.0324
PputA514_0850	3-hydroxydecanoyl-[acyl-carrier-protein] dehydratase OS=Pseudomonas fluorescens (strain SBW25) GN=fabA PE=3 SV=1	8.9808	5.16593	9.85663	11.0289
PputA514_1806	Cell division protein FtsA OS=Pseudomonas aeruginosa (strain ATCC 15692 / PAO1 / 1C / PRS 101 / LMG 12228) GN=ftsA PE=3 SV=2	9.78588	11.239	11.2849	11.0288
PputA514_5995	Biotin carboxylase OS=Pseudomonas aeruginosa (strain ATCC 15692 / PAO1 / 1C / PRS 101 / LMG 12228) GN=accC PE=1 SV=1	10.9692	12.1622	11.6086	11.0248
PputA514_0019	ATP synthase gamma chain OS=Pseudomonas fluorescens (strain Pf0-1) GN=atpG PE=3 SV=1	12.6166	12.0945	12.0783	11.0218
PputA514_6438	-	9.87839	9.56992	10.1552	11.0143
PputA514_4176	Protein translocase subunit SecA OS=Pseudomonas fluorescens (strain Pf-5 / ATCC BAA-477) GN=secA PE=3 SV=1	11.4265	12.0405	11.2012	11.0123
PputA514_3980	Acetyl-coenzyme A synthetase 1 OS=Pseudomonas aeruginosa (strain ATCC 15692 / PAO1 / 1C / PRS 101 / LMG 12228) GN=acsA1 PE=3 SV=1	9.70128	10.5201	11.3216	11.0111
PputA514_4905	50S ribosomal protein L11 OS=Pseudomonas fluorescens (strain SBW25) GN=rplK PE=3 SV=1	14.7026	14.0095	13.7748	11.0106
PputA514_2001	Chaperone protein ClpB OS=Pseudomonas aeruginosa (strain ATCC 15692 / PAO1 / 1C / PRS 101 / LMG 12228) GN=clpB PE=3 SV=1	11.8505	12.0373	11.9977	11.0086
PputA514_0527	hypothetical protein	9.07091	4.34519	10.7309	11.0039
PputA514_3153	NADP-dependent glyceraldehyde-3-phosphate dehydrogenase OS=Apium graveolens PE=1 SV=1	11.2619	11.2881	11.3898	10.9986
PputA514_0402	hypothetical protein	10.7899	9.88507	9.12281	10.9949
PputA514_3039	16 kDa heat shock protein B OS=Azotobacter vinelandii GN=ibpB PE=3 SV=1	11.7651	13.7393	11.5172	10.99
PputA514_0865	2-oxoglutarate dehydrogenase E1 component OS=Azotobacter vinelandii GN=sucA PE=3 SV=1	10.8023	12.2669	11.4741	10.9859
PputA514_3356	Type-1 fimbrial protein, A chain OS=Escherichia coli GN=fimA PE=1 SV=1	8.46232	0	0	10.9829
PputA514_4728	AMP nucleosidase OS=Escherichia coli (strain K12) GN=amn PE=1 SV=1	11.2479	11.6311	11.3013	10.9786
PputA514_4823	6,7-dimethyl-8-ribityllumazine synthase OS=Pseudomonas putida (strain KT2440) GN=ribH PE=3 SV=1	10.9856	12.0005	11.3166	10.9767
PputA514_4609	Glucose-6-phosphate isomerase OS=Pseudomonas fluorescens (strain SBW25) GN=pgi PE=3 SV=1	10.4673	11.1401	11.5891	10.9672
PputA514_3960	Aspartokinase OS=Pseudomonas aeruginosa (strain ATCC 15692 / PAO1 / 1C / PRS 101 / LMG 12228) GN=lysC PE=3 SV=2	10.6973	11.3124	10.4703	10.9662
PputA514_3099	Adenylosuccinate lyase OS=Pseudomonas aeruginosa (strain ATCC 15692 / PAO1 / 1C / PRS 101 / LMG 12228) GN=purB PE=3 SV=1	11.3854	10.5995	11.067	10.9656
PputA514_0262	Transcription termination factor Rho OS=Pseudomonas fluorescens biotype C GN=rho PE=3 SV=1	10.7634	10.8161	11.1258	10.9638
PputA514_1905	Aspartyl/glutamyl-tRNA(Asn/Gln) amidotransferase subunit B OS=Pseudomonas fluorescens (strain SBW25) GN=gatB PE=3 SV=1	10.977	11.3214	11.4935	10.9628
PputA514_1215	Aconitate hydratase 1 OS=Pseudomonas aeruginosa (strain ATCC 15692 / PAO1 / 1C / PRS 101 / LMG 12228) GN=acnA PE=3 SV=1	9.27697	9.78271	11.6773	10.9627
PputA514_4305	2-isopropylmalate synthase OS=Pseudomonas fluorescens (strain SBW25) GN=leuA PE=3 SV=1	10.6526	11.3981	10.3614	10.9608
PputA514_4734	Glutamate-1-semialdehyde 2,1-aminomutase OS=Pseudomonas fluorescens (strain SBW25) GN=hemL PE=3 SV=1	8.45305	9.49861	10.362	10.9498
PputA514_6102	Aspartate-semialdehyde dehydrogenase OS=Pseudomonas aeruginosa (strain ATCC 15692 / PAO1 / 1C / PRS 101 / LMG 12228) GN=asd PE=1 SV=2	10.911	11.4342	11.4068	10.9484
PputA514_1164	Transaldolase OS=Pseudomonas fluorescens (strain Pf-5 / ATCC BAA-477) GN=tal PE=3 SV=1	10.7453	10.057	11.1625	10.9474
PputA514_0001	DNA gyrase subunit B OS=Pseudomonas putida GN=gyrB PE=3 SV=2	11.6215	11.9464	10.9732	10.9399
PputA514_3979	Acetyl-coenzyme A synthetase OS=Pseudomonas syringae pv. syringae (strain B728a) GN=acsA PE=3 SV=1	9.17896	10.8057	11.4919	10.9353
PputA514_1213	Aconitate hydratase 1 OS=Pseudomonas aeruginosa (strain ATCC 15692 / PAO1 / 1C / PRS 101 / LMG 12228) GN=acnA PE=3 SV=1	10.1071	10.0559	10.9324	10.9331
PputA514_4255	Threonine synthase OS=Pseudomonas aeruginosa (strain ATCC 15692 / PAO1 / 1C / PRS 101 / LMG 12228) GN=thrC PE=3 SV=3	11.4667	12.2474	11.6558	10.9321
PputA514_1532	Lysine--tRNA ligase OS=Pseudomonas fluorescens (strain Pf-5 / ATCC BAA-477) GN=lysS PE=3 SV=1	10.9878	10.7036	10.8654	10.9313
PputA514_1218	Cysteine synthase A OS=Escherichia coli (strain K12) GN=cysK PE=1 SV=2	10.8563	10.7066	10.7661	10.9296
PputA514_4917	-	11.4203	10.9882	10.313	10.9173
PputA514_3708	Phosphoenolpyruvate synthase OS=Neisseria meningitidis serogroup B (strain MC58) GN=ppsA PE=1 SV=1	11.0422	12.1861	11.3462	10.9141
PputA514_0857	-	12.7836	4.44045	11.9548	10.9066
PputA514_3723	Methylisocitrate lyase OS=Salmonella typhimurium (strain LT2 / SGSC1412 / ATCC 700720) GN=prpB PE=1 SV=3	9.72807	8.61284	11.0933	10.9011
PputA514_4993	Acyl-CoA dehydrogenase OS=Bacillus subtilis (strain 168) GN=mmgC PE=2 SV=3	8.09289	8.57525	9.813	10.8924
PputA514_1826	Uncharacterized protein HI_1658 OS=Haemophilus influenzae (strain ATCC 51907 / DSM 11121 / KW20 / Rd) GN=HI_1658 PE=4 SV=1	11.4206	12.1785	11.1561	10.8882
PputA514_1377	3-carboxy-cis,cis-muconate cycloisomerase (Fragment) OS=Pseudomonas putida GN=pcaB PE=1 SV=3	8.97578	12.4553	10.91	10.8852
PputA514_1089	hypothetical protein	12.4007	12.5454	11.4629	10.867
PputA514_5896	2,3-bisphosphoglycerate-independent phosphoglycerate mutase OS=Pseudomonas fluorescens (strain Pf-5 / ATCC BAA-477) GN=gpmI PE=1 SV=1	10.5938	5.16225	10.8819	10.8662
PputA514_1200	3-ketoacyl-CoA thiolase OS=Pseudomonas fluorescens (strain Pf-5 / ATCC BAA-477) GN=fadA PE=3 SV=1	10.0175	10.5599	12.0376	10.8659
PputA514_3655	-	0	5.11287	0	10.8646
PputA514_1300	UPF0065 protein YflP OS=Bacillus subtilis (strain 168) GN=yflP PE=3 SV=2	3.29981	7.20183	10.4073	10.8586
PputA514_0137	Protein hcp1 OS=Pseudomonas aeruginosa (strain ATCC 15692 / PAO1 / 1C / PRS 101 / LMG 12228) GN=hcp1 PE=1 SV=1	9.42729	0	10.7612	10.8556
PputA514_4906	Transcription termination/antitermination protein NusG OS=Pseudomonas aeruginosa (strain ATCC 15692 / PAO1 / 1C / PRS 101 / LMG 12228) GN=nusG PE=3 SV=1	10.7527	11.5568	11.252	10.8433
PputA514_0375	Dihydroxy-acid dehydratase OS=Pseudomonas fluorescens (strain SBW25) GN=ilvD PE=3 SV=1	10.1276	11.2798	11.0252	10.8383
PputA514_0272	Quinone oxidoreductase-like protein 2 homolog OS=Nematostella vectensis GN=v1g238856 PE=3 SV=1	3.30426	7.71068	11.1782	10.829
PputA514_6300	Septum site-determining protein MinD OS=Shigella flexneri GN=minD PE=3 SV=2	10.7287	11.9616	11.3009	10.8221
PputA514_0226	Positive alginate biosynthesis regulatory protein OS=Pseudomonas aeruginosa (strain ATCC 15692 / PAO1 / 1C / PRS 101 / LMG 12228) GN=algR PE=3 SV=1	10.0994	9.55424	11.7821	10.8202
PputA514_5855	Cystine-binding periplasmic protein OS=Escherichia coli (strain K12) GN=fliY PE=1 SV=1	9.74704	10.0292	11.8021	10.8142
PputA514_4878	50S ribosomal protein L6 OS=Pseudomonas fluorescens (strain SBW25) GN=rplF PE=3 SV=1	13.4272	13.4516	12.9951	10.8129
PputA514_0519	-	9.15919	9.00407	11.3727	10.8071
PputA514_1040	DNA gyrase subunit A OS=Pseudomonas aeruginosa (strain ATCC 15692 / PAO1 / 1C / PRS 101 / LMG 12228) GN=gyrA PE=3 SV=1	10.1217	11.3383	11.1126	10.8055
PputA514_1552	Ferredoxin--NADP reductase OS=Azotobacter vinelandii GN=fpr PE=1 SV=3	11.0679	9.68053	10.1258	10.7988
PputA514_1873	Toluene tolerance protein ttg2D OS=Pseudomonas putida GN=ttg2D PE=3 SV=1	11.3597	10.0514	10.3899	10.7959
PputA514_6057	Translation initiation factor IF-3 OS=Pseudomonas fluorescens (strain SBW25) GN=infC PE=3 SV=1	12.2649	12.8573	11.9181	10.7956
PputA514_6468	hypothetical protein	11.7283	4.11176	13.3715	10.7955
PputA514_1279	Outer membrane protein assembly factor BamC OS=Thiobacillus denitrificans (strain ATCC 25259) GN=bamC PE=3 SV=1	11.8168	11.4631	10.9502	10.7876
PputA514_0894	Sulfate-binding protein OS=Shigella flexneri GN=sbp PE=3 SV=1	10.6967	10.3969	10.415	10.7868
PputA514_0473	hypothetical protein	11.8284	12.1457	11.2003	10.7813
PputA514_1045	Uncharacterized oxidoreductase YciK OS=Escherichia coli (strain K12) GN=yciK PE=1 SV=3	12.299	11.827	11.455	10.7772
PputA514_0119	hypothetical protein	12.6987	10.9279	12.1248	10.776
PputA514_4148	Protein TolB OS=Pseudomonas fluorescens (strain SBW25) GN=tolB PE=3 SV=1	10.7364	10.5353	10.3246	10.7689
PputA514_4863	Single-stranded DNA-binding protein OS=Pseudomonas syringae pv. tomato (strain DC3000) GN=ssb PE=1 SV=1	12.1277	11.6103	10.3881	10.7685
PputA514_0544	Carboxypeptidase G2 OS=Pseudomonas sp. (strain RS-16) GN=cpg2 PE=1 SV=1	8.74168	10.5862	10.2771	10.7623
PputA514_5858	Glucans biosynthesis protein G OS=Pseudomonas putida (strain W619) GN=opgG PE=3 SV=1	10.0953	10.693	10.9945	10.7588
PputA514_4885	30S ribosomal protein S17 OS=Pseudomonas fluorescens (strain SBW25) GN=rpsQ PE=3 SV=1	11.2894	5.47262	11.877	10.7576
PputA514_0224	Glutathione S-transferase OS=Pseudomonas putida (strain F1 / ATCC 700007) GN=Pput_0205 PE=1 SV=2	11.4324	11.1373	12.7248	10.7556
PputA514_6106	3-isopropylmalate dehydratase large subunit OS=Pseudomonas fluorescens (strain Pf-5 / ATCC BAA-477) GN=leuC PE=3 SV=1	8.76194	9.52257	10.2106	10.7508
PputA514_3082	Serine--tRNA ligase OS=Pseudomonas fluorescens (strain SBW25) GN=serS PE=3 SV=1	11.1174	10.9583	11.378	10.7492
PputA514_1379	Protocatechuate 3,4-dioxygenase alpha chain OS=Acinetobacter baylyi (strain ATCC 33305 / BD413 / ADP1) GN=pcaG PE=1 SV=3	0	13.4455	11.4744	10.7427
PputA514_1376	3-oxoadipate enol-lactonase 1 OS=Acinetobacter baylyi (strain ATCC 33305 / BD413 / ADP1) GN=pcaD PE=4 SV=2	9.31319	12.6951	11.7216	10.7415
PputA514_4545	Tryptophan synthase alpha chain OS=Pseudomonas fluorescens (strain SBW25) GN=trpA PE=3 SV=1	11.3736	11.1445	11.112	10.7411
PputA514_1595	Dihydroorotase OS=Pseudomonas fluorescens (strain SBW25) GN=pyrC PE=3 SV=1	9.82419	9.72646	10.4186	10.7374
PputA514_5667	High-affinity branched-chain amino acid transport ATP-binding protein LivF OS=Salmonella typhimurium (strain LT2 / SGSC1412 / ATCC 700720) GN=livF PE=3 SV=1	8.73355	10.7714	10.9829	10.7364
PputA514_4243	Proline--tRNA ligase OS=Pseudomonas fluorescens (strain Pf-5 / ATCC BAA-477) GN=proS PE=3 SV=1	10.3909	11.1889	10.9865	10.7286
PputA514_6103	3-isopropylmalate dehydrogenase OS=Pseudomonas fluorescens (strain Pf-5 / ATCC BAA-477) GN=leuB PE=3 SV=1	10.8295	11.1531	11.2173	10.7252
PputA514_2758	Uncharacterized protein YmdF OS=Escherichia coli (strain K12) GN=ymdF PE=3 SV=1	10.7639	0	12.4007	10.7199
PputA514_1688	Signal peptidase I OS=Pseudomonas fluorescens GN=lepB PE=3 SV=1	9.40958	5.37004	9.77423	10.7194
PputA514_1693	Probable cytosol aminopeptidase OS=Pseudomonas fluorescens (strain SBW25) GN=pepA PE=3 SV=1	12.2218	13.1377	12.0352	10.7177
PputA514_6385	Protein FlaG OS=Vibrio parahaemolyticus serotype O3:K6 (strain RIMD 2210633) GN=flaG PE=4 SV=2	0	4.19772	0	10.7137
PputA514_6244	3-ketoacyl-CoA thiolase OS=Bacillus subtilis (strain 168) GN=fadA PE=2 SV=1	3.81875	0	9.64623	10.71
PputA514_3825	-	11.4103	0	11.1548	10.7053
PputA514_6331	UPF0345 protein PFLU_4399 OS=Pseudomonas fluorescens (strain SBW25) GN=PFLU_4399 PE=3 SV=1	11.7347	12.4231	5.57727	10.7037
PputA514_1884	Ribosome hibernation promoting factor OS=Pseudomonas putida GN=hpf PE=3 SV=1	12.6334	13.1564	12.5962	10.7005
PputA514_4328	Cysteine desulfurase OS=Pseudomonas fluorescens (strain SBW25) GN=iscS PE=3 SV=1	9.22909	10.6113	10.7809	10.6828
PputA514_4272	Uncharacterized protein PA3753 OS=Pseudomonas aeruginosa (strain ATCC 15692 / PAO1 / 1C / PRS 101 / LMG 12228) GN=PA3753 PE=3 SV=2	10.0203	4.42367	4.90596	10.6778
PputA514_5594	-	14.4909	5.98312	13.5716	10.6751
PputA514_4075	6-phosphogluconolactonase OS=Pseudomonas aeruginosa (strain ATCC 15692 / PAO1 / 1C / PRS 101 / LMG 12228) GN=pgl PE=3 SV=2	13.9363	10.0963	10.2046	10.6681
PputA514_5069	Uncharacterized protein ORF1 (Fragment) OS=Chromohalobacter salexigens (strain DSM 3043 / ATCC BAA-138 / NCIMB 13768) PE=4 SV=1	10.2417	10.8399	10.6693	10.6669
PputA514_5102	S-adenosylmethionine synthase OS=Pseudomonas fluorescens (strain SBW25) GN=metK PE=3 SV=1	11.1114	11.4808	11.7163	10.6614
PputA514_4963	Chaperone SurA OS=Pseudomonas fluorescens (strain Pf-5 / ATCC BAA-477) GN=surA PE=1 SV=2	11.804	9.86851	10.7614	10.6597
PputA514_2024	Sulfate adenylyltransferase subunit 2 OS=Pseudomonas fluorescens (strain SBW25) GN=cysD PE=3 SV=1	9.71063	9.9326	10.4773	10.6595
PputA514_3017	Pectin lyase OS=Pseudomonas marginalis GN=pnl PE=1 SV=2	0	0	0	10.6571
PputA514_5112	Uncharacterized acyl-CoA thioester hydrolase HI_0827 OS=Haemophilus influenzae (strain ATCC 51907 / DSM 11121 / KW20 / Rd) GN=HI_0827 PE=1 SV=1	4.84702	9.78139	11.3876	10.6509
PputA514_2311	4-hydroxyphenylpyruvate dioxygenase OS=Pseudomonas sp. (strain P.J. 874) GN=hpd PE=1 SV=1	8.60391	9.36453	11.2264	10.6507
PputA514_1221	ATPase	10.1417	9.18233	10.6935	10.646
PputA514_4446	Probable 3-hydroxyisobutyrate dehydrogenase, mitochondrial OS=Dictyostelium discoideum GN=hibA PE=3 SV=1	9.92925	7.85041	10.5122	10.642
PputA514_0172	Acetylglutamate kinase OS=Pseudomonas fluorescens (strain SBW25) GN=argB PE=3 SV=1	11.6854	11.506	10.7943	10.6391
PputA514_5100	Transketolase 1 OS=Escherichia coli (strain K12) GN=tktA PE=1 SV=5	10.0757	11.4523	10.8564	10.6349
PputA514_2471	-	0	0	11.0337	10.6327
PputA514_5766	Pyruvate dehydrogenase E1 component OS=Escherichia coli (strain K12) GN=aceE PE=1 SV=2	11.4365	10.7674	10.5832	10.6317
PputA514_1173	blue (type1) copper domain-containing protein	12.5722	11.4015	5.01334	10.6293
PputA514_1214	Aconitate hydratase 1 OS=Pseudomonas aeruginosa (strain ATCC 15692 / PAO1 / 1C / PRS 101 / LMG 12228) GN=acnA PE=3 SV=1	9.19926	11.1091	10.7963	10.6234
PputA514_5700	Protein HflC OS=Haemophilus influenzae (strain ATCC 51907 / DSM 11121 / KW20 / Rd) GN=hflC PE=3 SV=1	10.9133	10.4995	11.4555	10.6178
PputA514_0016	ATP synthase subunit b OS=Pseudomonas syringae pv. phaseolicola (strain 1448A / Race 6) GN=atpF PE=3 SV=1	14.3126	12.3629	11.3293	10.6176
PputA514_2174	Cystathionine beta-lyase OS=Coxiella burnetii (strain RSA 493 / Nine Mile phase I) GN=metC PE=1 SV=1	9.03333	9.69294	11.5124	10.6159
PputA514_6055	50S ribosomal protein L20 OS=Pseudomonas fluorescens (strain SBW25) GN=rplT PE=3 SV=1	10.2882	10.5226	9.77857	10.6126
PputA514_4200	Fumarate hydratase class I, aerobic OS=Escherichia coli (strain K12) GN=fumA PE=1 SV=2	9.64116	10.9776	10.2355	10.6122
PputA514_0516	Mannose-1-phosphate guanylyltransferase OS=Escherichia coli GN=manC PE=3 SV=1	7.34232	3.84371	10.7182	10.6107
PputA514_0828	Putative dipeptidase YtjP OS=Bacillus subtilis (strain 168) GN=ytjP PE=3 SV=1	6.87727	7.74108	10.5153	10.6089
PputA514_5832	ATP-dependent protease ATPase subunit HslU OS=Pseudomonas fluorescens (strain SBW25) GN=hslU PE=3 SV=1	10.2827	10.2037	10.8787	10.6064
PputA514_1364	N-ethylmaleimide reductase OS=Escherichia coli (strain K12) GN=nemA PE=1 SV=1	9.75068	8.37182	7.28768	10.5954
PputA514_5666	Sulfoacetaldehyde reductase OS=Klebsiella oxytoca GN=isfD PE=1 SV=1	11.7405	11.8214	11.1458	10.5954
PputA514_1903	Glutamyl-tRNA(Gln) amidotransferase subunit A OS=Pseudomonas fluorescens (strain SBW25) GN=gatA PE=3 SV=1	11.019	11.2297	10.5615	10.5919
PputA514_5496	Putative lipoprotein Lxx21020 OS=Leifsonia xyli subsp. xyli (strain CTCB07) GN=Lxx21020 PE=4 SV=2	11.005	0	4.27271	10.5883
PputA514_4611	Acetyl-coenzyme A synthetase 2 OS=Pseudomonas putida (strain KT2440) GN=acsA2 PE=3 SV=1	4.13545	10.124	11.4153	10.5883
PputA514_5786	Sporulation initiation inhibitor protein Soj OS=Bacillus halodurans (strain ATCC BAA-125 / DSM 18197 / FERM 7344 / JCM 9153 / C-125) GN=soj PE=3 SV=1	9.59481	9.80092	10.766	10.5802
PputA514_5486	-	10.9978	3.92553	10.3815	10.5745
PputA514_0654	Porin-like protein GalP OS=Pseudomonas putida (strain KT2440) GN=galP PE=3 SV=1	0	3.71305	11.1782	10.5709
PputA514_4657	-	0	0	3.89977	10.5632
PputA514_1282	Putative peroxiredoxin YgaF OS=Bacillus subtilis (strain 168) GN=ygaF PE=3 SV=1	11.9077	11.3984	10.9674	10.5618
PputA514_1869	UDP-N-acetylglucosamine 1-carboxyvinyltransferase OS=Pseudomonas fluorescens (strain SBW25) GN=murA PE=3 SV=1	9.85087	10.8206	10.4791	10.56
PputA514_3612	Iron-regulated protein FrpA OS=Neisseria meningitidis serogroup B (strain MC58) GN=frpA PE=3 SV=1	0	5.03062	4.31468	10.5591
PputA514_2488	D-ribose-binding protein OS=Bacillus subtilis (strain 168) GN=rbsB PE=3 SV=2	9.20749	9.96928	9.60691	10.5581
PputA514_1828	OmpA/MotB domain-containing protein	11.9243	5.59646	10.8172	10.5552
PputA514_4745	LPS-assembly lipoprotein LptE OS=Erwinia carotovora subsp. atroseptica (strain SCRI 1043 / ATCC BAA-672) GN=lptE PE=3 SV=1	11.362	10.1964	10.0951	10.5499
PputA514_6230	L-lactate dehydrogenase [cytochrome] OS=Pseudomonas fluorescens (strain SBW25) GN=lldD PE=3 SV=2	0	0	10.2978	10.5483
PputA514_2624	-	0	5.05353	10.5246	10.5478
PputA514_1372	Porin-like protein GalP OS=Pseudomonas putida (strain KT2440) GN=galP PE=3 SV=1	0	11.9158	11.2257	10.5465
PputA514_2523	-	0	0	5.44229	10.544
PputA514_1461	S-formylglutathione hydrolase YeiG OS=Escherichia coli O157:H7 GN=yeiG PE=3 SV=1	0	10.7288	10.7633	10.5433
PputA514_5701	Modulator of FtsH protease HflK OS=Escherichia coli (strain K12) GN=hflK PE=1 SV=1	10.9769	10.9536	11.1501	10.5362
PputA514_4621	Translation initiation factor IF-2 OS=Pseudomonas fluorescens (strain SBW25) GN=infB PE=3 SV=1	10.1681	10.821	10.4804	10.5303
PputA514_2549	Serralysin OS=Pseudomonas aeruginosa (strain ATCC 15692 / PAO1 / 1C / PRS 101 / LMG 12228) GN=aprA PE=1 SV=1	6.50086	0	3.40567	10.5293
PputA514_4979	RNA polymerase sigma factor RpoD OS=Pseudomonas fluorescens GN=rpoD PE=3 SV=1	11.5864	11.1231	10.3548	10.5271
PputA514_4256	Homoserine dehydrogenase OS=Pseudomonas aeruginosa (strain ATCC 15692 / PAO1 / 1C / PRS 101 / LMG 12228) GN=hom PE=3 SV=2	11.2253	12.0285	10.6205	10.5258
PputA514_6071	Glutaminase-asparaginase OS=Pseudomonas fluorescens biotype A GN=ansB PE=1 SV=1	11.0132	9.84762	10.5226	10.5237
PputA514_1366	Probable efflux pump periplasmic linker TtgA OS=Pseudomonas putida (strain KT2440) GN=ttgA PE=1 SV=1	11.0116	9.74219	10.8193	10.5189
PputA514_5699	ATP phosphoribosyltransferase regulatory subunit OS=Pseudomonas fluorescens (strain SBW25) GN=hisZ PE=3 SV=1	11.0741	11.8348	11.1728	10.5159
PputA514_0292	UDP-4-amino-4-deoxy-L-arabinose--oxoglutarate aminotransferase OS=Pseudomonas fluorescens (strain Pf-5 / ATCC BAA-477) GN=arnB PE=3 SV=2	9.37158	10.2932	10.5492	10.5121
PputA514_5812	Glutamate synthase [NADPH] large chain OS=Escherichia coli (strain K12) GN=gltB PE=1 SV=3	10.2573	10.9061	10.8206	10.5066
PputA514_1254	beta-lactamase domain-containing protein	3.73045	4.07895	11.0359	10.5034
PputA514_5534	C4-dicarboxylate-binding periplasmic protein OS=Rhodobacter capsulatus GN=dctP PE=1 SV=1	3.59229	3.44077	11.1184	10.4989
PputA514_5907	Imidazoleglycerol-phosphate dehydratase OS=Pseudomonas fluorescens (strain SBW25) GN=hisB PE=3 SV=1	9.27661	9.83662	11.1462	10.4864
PputA514_1622	Probable 4-aminobutyrate aminotransferase OS=Bacillus subtilis (strain 168) GN=gabT PE=3 SV=1	10.629	11.2231	9.35876	10.4808
PputA514_3854	Ribonuclease E OS=Escherichia coli (strain K12) GN=rne PE=1 SV=6	11.6369	10.9992	10.6008	10.4723
PputA514_4094	-	12.0732	10.423	10.7148	10.4638
PputA514_2603	Fumarylacetoacetate hydrolase domain-containing protein 2 OS=Bos taurus GN=FAHD2 PE=2 SV=1	3.40406	8.6825	10.3778	10.4638
PputA514_5038	Serine hydroxymethyltransferase 3 OS=Pseudomonas fluorescens (strain Pf0-1) GN=glyA3 PE=3 SV=1	9.21695	8.89483	10.0326	10.463
PputA514_6118	Aspartate aminotransferase OS=Pseudomonas aeruginosa (strain ATCC 15692 / PAO1 / 1C / PRS 101 / LMG 12228) GN=aspC PE=3 SV=2	9.81977	10.9295	10.1112	10.4626
PputA514_4071	-	13.0646	8.77887	12.1431	10.4618
PputA514_4769	Uncharacterized protein YraR OS=Escherichia coli (strain K12) GN=yraR PE=4 SV=2	4.95925	4.77778	11.9709	10.4608
PputA514_4899	30S ribosomal protein S12 OS=Pseudomonas syringae pv. syringae (strain B728a) GN=rpsL PE=3 SV=1	11.4176	11.2269	9.18926	10.4605
PputA514_1904	Aspartyl/glutamyl-tRNA(Asn/Gln) amidotransferase subunit B OS=Pseudomonas fluorescens (strain SBW25) GN=gatB PE=3 SV=1	9.16878	9.59036	9.52162	10.4564
PputA514_2052	Ribose-phosphate pyrophosphokinase OS=Pseudomonas syringae pv. tomato (strain DC3000) GN=prs PE=3 SV=1	9.97275	11.8638	10.9271	10.4553
PputA514_1064	Putative reductase PFLU_1621 OS=Pseudomonas fluorescens (strain SBW25) GN=PFLU_1621 PE=3 SV=1	11.2298	11.8972	10.7295	10.4472
PputA514_4954	Spermidine/putrescine-binding periplasmic protein 2 OS=Haemophilus influenzae (strain ATCC 51907 / DSM 11121 / KW20 / Rd) GN=potD-A PE=3 SV=2	7.17152	8.96128	10.7373	10.438
PputA514_4544	Tryptophan synthase beta chain OS=Pseudomonas syringae pv. syringae GN=trpB PE=3 SV=1	10.2234	9.82998	11.3104	10.4236
PputA514_4784	Inorganic pyrophosphatase 1 OS=Pseudomonas syringae pv. tomato (strain DC3000) GN=ppa1 PE=3 SV=1	13.0249	12.3849	12.2068	10.4182
PputA514_5767	Dihydrolipoyllysine-residue acetyltransferase component of pyruvate dehydrogenase complex OS=Pseudomonas aeruginosa (strain ATCC 15692 / PAO1 / 1C / PRS 101 / LMG 12228) GN=aceF PE=1 SV=2	12.3133	11.1397	5.26888	10.4091
PputA514_0786	Tail-specific protease OS=Escherichia coli (strain K12) GN=prc PE=1 SV=2	9.95109	10.3019	10.6067	10.4088
PputA514_6271	Uncharacterized isochorismatase family protein YddQ OS=Bacillus subtilis (strain 168) GN=yddQ PE=3 SV=1	12.0651	12.2613	10.8673	10.4053
PputA514_1478	Skp-like protein OS=Pseudomonas aeruginosa (strain ATCC 15692 / PAO1 / 1C / PRS 101 / LMG 12228) GN=PA3647 PE=3 SV=1	13.7161	12.1222	12.2927	10.404
PputA514_2622	Gallate dioxygenase OS=Pseudomonas putida (strain KT2440) GN=galA PE=1 SV=1	0	8.55517	10.5243	10.4011
PputA514_5560	Acyl-CoA dehydrogenase family member 11 OS=Gallus gallus GN=ACAD11 PE=2 SV=1	3.90152	7.29086	10.945	10.3978
PputA514_4068	Long-chain-fatty-acid--CoA ligase OS=Salmonella typhimurium (strain LT2 / SGSC1412 / ATCC 700720) GN=fadD PE=3 SV=1	6.55669	8.69274	11.2982	10.396
PputA514_3844	3-oxoacyl-[acyl-carrier-protein] reductase FabG OS=Pseudomonas aeruginosa (strain ATCC 15692 / PAO1 / 1C / PRS 101 / LMG 12228) GN=fabG PE=1 SV=1	10.6578	9.87878	10.1946	10.3949
PputA514_0958	Uncharacterized protein YgiD OS=Escherichia coli (strain K12) GN=ygiD PE=1 SV=3	0	9.43808	10.0496	10.3942
PputA514_4767	Probable enoyl-CoA hydratase 1 OS=Mycobacterium tuberculosis GN=Rv0130 PE=1 SV=1	10.9324	10.9983	10.5895	10.3883
PputA514_4572	Glycine--tRNA ligase beta subunit OS=Pseudomonas fluorescens (strain SBW25) GN=glyS PE=3 SV=1	9.56874	9.72507	10.0044	10.3808
PputA514_4571	Glycine--tRNA ligase beta subunit OS=Pseudomonas fluorescens (strain SBW25) GN=glyS PE=3 SV=1	10.5993	11.1881	10.3307	10.3796
PputA514_5770	Peptide methionine sulfoxide reductase MsrA OS=Pseudomonas syringae pv. syringae (strain B728a) GN=msrA PE=3 SV=1	8.70151	4.96964	9.33033	10.3778
PputA514_1246	Cyclohexadienyl dehydratase OS=Pseudomonas aeruginosa (strain ATCC 15692 / PAO1 / 1C / PRS 101 / LMG 12228) GN=pheC PE=1 SV=2	9.84648	9.21033	10.3476	10.3766
PputA514_2023	Bifunctional enzyme CysN/CysC OS=Pseudomonas aeruginosa (strain ATCC 15692 / PAO1 / 1C / PRS 101 / LMG 12228) GN=cysNC PE=3 SV=1	10.7404	11.2942	10.0981	10.368
PputA514_4880	30S ribosomal protein S14 OS=Pseudomonas syringae pv. syringae (strain B728a) GN=rpsN PE=3 SV=1	11.448	10.1893	10.3238	10.3653
PputA514_1522	Phosphoenolpyruvate carboxylase OS=Pseudomonas fluorescens (strain Pf0-1) GN=ppc PE=3 SV=1	10.5771	10.7085	10.45	10.361
PputA514_5695	Iron-utilization periplasmic protein OS=Haemophilus influenzae (strain ATCC 51907 / DSM 11121 / KW20 / Rd) GN=fbpA PE=1 SV=3	10.5865	9.33753	8.82935	10.3496
PputA514_4539	Uncharacterized protein YvbT OS=Bacillus subtilis (strain 168) GN=yvbT PE=4 SV=1	8.18023	8.96809	10.1751	10.3469
PputA514_1752	Uncharacterized amino-acid ABC transporter ATP-binding protein YhdZ OS=Escherichia coli (strain K12) GN=yhdZ PE=3 SV=1	10.3472	11.457	11.0305	10.3456
PputA514_4951	1,3-propanediol dehydrogenase OS=Klebsiella pneumoniae GN=dhaT PE=1 SV=1	9.27468	8.56254	10.3082	10.3438
PputA514_1469	CTP synthase OS=Pseudomonas fluorescens (strain SBW25) GN=pyrG PE=3 SV=1	9.44724	11.3808	10.3743	10.3434
PputA514_1868	ATP phosphoribosyltransferase OS=Pseudomonas fluorescens (strain SBW25) GN=hisG PE=3 SV=1	10.555	10.691	10.0346	10.3429
PputA514_1046	Glutathione-binding protein GsiB OS=Escherichia coli (strain UTI89 / UPEC) GN=gsiB PE=3 SV=2	8.28986	3.15653	9.78476	10.3422
PputA514_3674	Cell division protein ZipA homolog OS=Pseudomonas fluorescens (strain SBW25) GN=zipA PE=3 SV=1	9.97967	10.7048	9.92631	10.3231
PputA514_5842	Ubiquinone/menaquinone biosynthesis C-methyltransferase UbiE OS=Pseudomonas fluorescens (strain SBW25) GN=ubiE PE=3 SV=1	10.1836	9.55499	10.8142	10.3229
PputA514_3109	NADH-quinone oxidoreductase subunit G OS=Pseudomonas fluorescens GN=nuoG PE=2 SV=1	10.9155	11.2157	10.9692	10.3175
PputA514_3866	Ribonucleoside-diphosphate reductase subunit alpha OS=Chlamydia trachomatis (strain D/UW-3/Cx) GN=nrdA PE=3 SV=2	11.0879	11.2259	10.6541	10.3121
PputA514_4866	Bacterioferritin OS=Pseudomonas putida GN=bfr PE=3 SV=1	12.2072	11.5919	12.8669	10.3102
PputA514_4635	Carbamoyl-phosphate synthase small chain OS=Pseudomonas putida (strain KT2440) GN=carA PE=3 SV=1	10.7088	10.3254	11.1589	10.3072
PputA514_0733	Acetyl-CoA acetyltransferase OS=Pseudomonas aeruginosa (strain ATCC 15692 / PAO1 / 1C / PRS 101 / LMG 12228) GN=atoB PE=3 SV=1	8.68395	9.99434	9.53558	10.3068
PputA514_1863	Uracil phosphoribosyltransferase OS=Pseudomonas fluorescens (strain SBW25) GN=upp PE=3 SV=1	10.4167	9.85652	10.3203	10.3025
PputA514_5964	Uncharacterized protein y4xJ OS=Rhizobium sp. (strain NGR234) GN=NGR_a00790 PE=3 SV=1	0	0	11.0694	10.2964
PputA514_0981	Phospho-2-dehydro-3-deoxyheptonate aldolase, Tyr-sensitive OS=Salmonella typhimurium (strain LT2 / SGSC1412 / ATCC 700720) GN=aroF PE=3 SV=1	10.5133	11.3859	10.0183	10.2958
PputA514_4034	-	11.7527	10.0736	11.6462	10.2956
PputA514_0748	Probable Xaa-Pro aminopeptidase P OS=Coprinopsis cinerea (strain Okayama-7 / 130 / ATCC MYA-4618 / FGSC 9003) GN=AMPP PE=3 SV=1	8.85525	9.67255	10.278	10.2909
PputA514_5182	Uncharacterized oxidoreductase YgfF OS=Escherichia coli (strain K12) GN=ygfF PE=3 SV=2	10.9254	10.199	10.625	10.2837
PputA514_0229	Putative uroporphyrinogen-III C-methyltransferase OS=Escherichia coli (strain K12) GN=hemX PE=1 SV=1	11.753	11.2695	10.8847	10.2811
PputA514_1137	Circadian clock protein kinase KaiC OS=Synechococcus sp. (strain ATCC 27264 / PCC 7002 / PR-6) GN=kaiC PE=3 SV=2	8.23683	9.98447	10.4584	10.2755
PputA514_2994	L-arabinose-binding periplasmic protein OS=Escherichia coli (strain K12) GN=araF PE=1 SV=2	9.79988	8.96377	10.0994	10.2725
PputA514_0448	Glutamate/aspartate periplasmic-binding protein OS=Escherichia coli (strain K12) GN=gltI PE=1 SV=2	4.52295	0	9.8564	10.2718
PputA514_3086	Outer-membrane lipoprotein carrier protein OS=Pseudomonas fluorescens (strain SBW25) GN=lolA PE=3 SV=1	10.1586	0	9.13444	10.2533
PputA514_1039	Phosphoserine aminotransferase OS=Pseudomonas fluorescens (strain SBW25) GN=serC PE=3 SV=1	10.5987	10.6442	10.5496	10.2508
PputA514_0518	EPS I polysaccharide export outer membrane protein EpsA OS=Ralstonia solanacearum GN=epsA PE=3 SV=1	8.4249	0	9.14501	10.2493
PputA514_5963	-	4.12895	0	10.3225	10.244
PputA514_5399	Uncharacterized protein YieF OS=Shigella flexneri GN=yieF PE=3 SV=1	9.96547	10.0531	10.6937	10.2418
PputA514_1919	Cytochrome c1 OS=Allochromatium vinosum (strain ATCC 17899 / DSM 180 / NBRC 103801 / D) GN=petC PE=4 SV=1	12.0094	11.8	10.2967	10.2414
PputA514_4123	Arginine deiminase OS=Pseudomonas aeruginosa (strain ATCC 15692 / PAO1 / 1C / PRS 101 / LMG 12228) GN=arcA PE=1 SV=2	13.206	10.741	8.15413	10.2394
PputA514_0980	phospho-2-dehydro-3-deoxyheptonate aldolase	4.33731	4.35266	4.27722	10.231
PputA514_3111	NADH-quinone oxidoreductase subunit I OS=Pseudomonas fluorescens (strain Pf0-1) GN=nuoI PE=3 SV=1	8.97582	9.31936	8.91648	10.2301
PputA514_6091	Amidophosphoribosyltransferase OS=Pseudomonas aeruginosa (strain ATCC 15692 / PAO1 / 1C / PRS 101 / LMG 12228) GN=purF PE=3 SV=3	9.12614	10.5153	10.5668	10.2255
PputA514_3428	dTDP-glucose 4,6-dehydratase OS=Neisseria meningitidis serogroup B (strain MC58) GN=rfbB1 PE=3 SV=2	11.5038	10.9463	11.2447	10.2233
PputA514_1805	Cell division protein FtsZ OS=Pseudomonas putida (strain KT2440) GN=ftsZ PE=3 SV=3	10.93	9.17969	9.18047	10.222
PputA514_1416	Carbonyl reductase [NADPH] 2 OS=Mus musculus GN=Cbr2 PE=1 SV=1	8.92298	4.61931	9.86363	10.2198
PputA514_5350	Uncharacterized oxidoreductase YvaG OS=Bacillus subtilis (strain 168) GN=yvaG PE=3 SV=1	0	4.88336	9.39749	10.2185
PputA514_5567	NAD-specific glutamate dehydrogenase OS=Pseudomonas aeruginosa (strain ATCC 15692 / PAO1 / 1C / PRS 101 / LMG 12228) GN=gdhB PE=1 SV=1	10.2753	11.3825	11.2915	10.2146
PputA514_0153	-	12.0212	9.30309	9.73347	10.212
PputA514_0316	Gamma aminobutyrate transaminase 1, mitochondrial OS=Solanum lycopersicum GN=GABA-TP1 PE=1 SV=1	4.13545	4.78399	9.91526	10.2068
PputA514_6378	Flagellar hook-basal body complex protein FliE OS=Pseudomonas fluorescens (strain SBW25) GN=fliE PE=3 SV=1	0	0	0	10.1976
PputA514_0974	HTH-type transcriptional regulator CysB OS=Salmonella typhimurium (strain LT2 / SGSC1412 / ATCC 700720) GN=cysB PE=1 SV=1	10.0864	9.17656	10.0993	10.1906
PputA514_4012	Glycerophosphoryl diester phosphodiesterase OS=Bacillus subtilis (strain 168) GN=glpQ PE=3 SV=1	11.217	9.95769	10.4975	10.1885
PputA514_3815	Electron transfer flavoprotein-ubiquinone oxidoreductase OS=Pseudomonas aeruginosa (strain ATCC 15692 / PAO1 / 1C / PRS 101 / LMG 12228) GN=PA2953 PE=1 SV=1	9.8045	10.9806	11.7135	10.1856
PputA514_1471	Acetyl-coenzyme A carboxylase carboxyl transferase subunit alpha OS=Pseudomonas fluorescens (strain SBW25) GN=accA PE=3 SV=1	10.4657	11.2478	10.6079	10.1796
PputA514_1168	Uncharacterized lipoprotein HI_0718 OS=Haemophilus influenzae (strain ATCC 51907 / DSM 11121 / KW20 / Rd) GN=HI_0718 PE=3 SV=1	10.9927	9.48008	9.87558	10.1744
PputA514_5954	3-oxoacyl-[acyl-carrier-protein] reductase FabG OS=Thermotoga maritima (strain ATCC 43589 / MSB8 / DSM 3109 / JCM 10099) GN=fabG PE=3 SV=1	9.07731	8.35242	11.3016	10.1742
PputA514_1375	4-carboxymuconolactone decarboxylase OS=Acinetobacter baylyi (strain ATCC 33305 / BD413 / ADP1) GN=pcaC PE=4 SV=2	5.50894	13.7603	11.2109	10.1731
PputA514_3721	Aconitate hydratase OS=Rickettsia bellii (strain RML369-C) GN=acnA PE=3 SV=1	8.50088	8.55136	10.6598	10.1593
PputA514_4248	-	0	4.34519	5.10122	10.1533
PputA514_1524	hypothetical protein	12.9477	8.94647	10.6842	10.1497
PputA514_2019	30S ribosomal protein S20 OS=Pseudomonas fluorescens (strain SBW25) GN=rpsT PE=3 SV=1	13.2402	12.5734	12.2759	10.1497
PputA514_4447	Methylmalonate-semialdehyde dehydrogenase [acylating], mitochondrial OS=Arabidopsis thaliana GN=ALDH6B2 PE=2 SV=2	8.94071	9.94108	10.9312	10.1474
PputA514_1858	Probable malate:quinone oxidoreductase OS=Pseudomonas fluorescens GN=mqo PE=3 SV=1	10.1688	10.8454	10.9627	10.1459
PputA514_5487	General stress protein 18 OS=Bacillus subtilis (strain 168) GN=yfkM PE=1 SV=3	8.9707	0	9.82233	10.1453
PputA514_3108	NADH-quinone oxidoreductase subunit F OS=Pseudomonas aeruginosa (strain ATCC 15692 / PAO1 / 1C / PRS 101 / LMG 12228) GN=nuoF PE=3 SV=1	10.7343	10.8586	10.5669	10.1439
PputA514_1735	-	8.57133	8.80366	10.7006	10.1385
PputA514_0620	Isoquinoline 1-oxidoreductase subunit beta OS=Brevundimonas diminuta GN=iorB PE=1 SV=1	8.74673	10.3067	10.8611	10.1296
PputA514_2978	Quinone oxidoreductase PIG3 OS=Homo sapiens GN=TP53I3 PE=1 SV=2	7.92728	0	10.3084	10.1129
PputA514_6064	Uncharacterized protein C1683.06c OS=Schizosaccharomyces pombe (strain 972 / ATCC 24843) GN=SPBC1683.06c PE=3 SV=1	10.4342	9.8333	10.6277	10.1126
PputA514_0022	ATP synthase epsilon chain OS=Pseudomonas fluorescens (strain SBW25) GN=atpC PE=3 SV=1	10.8339	9.31495	8.89172	10.1085
PputA514_5263	Uncharacterized protein YeaE OS=Escherichia coli (strain K12) GN=yeaE PE=4 SV=1	9.9203	7.96224	9.31118	10.1082
PputA514_4753	D-alanyl-D-alanine carboxypeptidase DacC OS=Escherichia coli (strain K12) GN=dacC PE=1 SV=2	10.2792	10.0205	11.1817	10.1027
PputA514_4962	LPS-assembly protein LptD OS=Pseudomonas fluorescens (strain Pf-5 / ATCC BAA-477) GN=lptD PE=3 SV=2	9.47037	10.186	10.3182	10.1021
PputA514_1607	Glycerol kinase OS=Pseudomonas fluorescens (strain SBW25) GN=glpK PE=3 SV=1	7.7985	8.19753	10.2678	10.0904
PputA514_2824	Soluble aldose sugar dehydrogenase YliI OS=Escherichia coli (strain K12) GN=yliI PE=1 SV=1	9.45264	8.73845	9.89328	10.0732
PputA514_3889	-	10.1814	0	9.30014	10.0693
PputA514_1827	Probable lipoprotein YiaD OS=Escherichia coli (strain K12) GN=yiaD PE=1 SV=2	9.9203	0	9.23518	10.0692
PputA514_0173	Phosphomannomutase/phosphoglucomutase OS=Pseudomonas syringae pv. tomato (strain DC3000) GN=algC PE=3 SV=1	9.30974	9.27887	10.2038	10.0631
PputA514_1043	Ubiquinone biosynthesis O-methyltransferase OS=Pseudomonas fluorescens (strain SBW25) GN=ubiG PE=3 SV=1	11.4789	11.1895	10.7069	10.0612
PputA514_5893	Protein-export protein SecB OS=Pseudomonas fluorescens (strain SBW25) GN=secB PE=3 SV=1	11.5332	11.1458	11.9138	10.0566
PputA514_2400	Circadian clock protein kinase KaiC OS=Synechococcus sp. (strain ATCC 27264 / PCC 7002 / PR-6) GN=kaiC PE=3 SV=2	7.77976	9.66181	10.19	10.0523
PputA514_1479	Outer membrane protein assembly factor BamA OS=Neisseria meningitidis serogroup B (strain MC58) GN=bamA PE=1 SV=1	10.3787	10.1072	10.9066	10.0455
PputA514_6255	Probable oxidoreductase EphD OS=Mycobacterium tuberculosis GN=ephD PE=3 SV=1	0	0	9.76833	10.0446
PputA514_1489	Methionine aminopeptidase OS=Shigella flexneri GN=map PE=3 SV=1	8.58381	5.05963	9.95499	10.0416
PputA514_2299	UTP--glucose-1-phosphate uridylyltransferase OS=Pseudomonas aeruginosa GN=galU PE=3 SV=1	10.228	10.6468	10.8699	10.0407
PputA514_4632	Transcription elongation factor GreA OS=Pseudomonas syringae pv. tomato (strain DC3000) GN=greA PE=3 SV=1	11.4921	11.7932	0	10.0394
PputA514_1404	High-affinity branched-chain amino acid transport ATP-binding protein BraF OS=Pseudomonas aeruginosa (strain ATCC 15692 / PAO1 / 1C / PRS 101 / LMG 12228) GN=braF PE=3 SV=1	9.69176	10.9015	11.1794	10.0326
PputA514_3429	dTDP-4-dehydrorhamnose 3,5-epimerase OS=Pseudomonas aeruginosa (strain ATCC 15692 / PAO1 / 1C / PRS 101 / LMG 12228) GN=rmlC PE=1 SV=1	8.76729	10.3064	10.4244	10.0306
PputA514_1277	Phosphoribosylaminoimidazole-succinocarboxamide synthase OS=Pseudomonas fluorescens (strain SBW25) GN=purC PE=3 SV=1	10.9451	9.87377	10.616	10.0305
PputA514_4970	Uncharacterized protein YcgB OS=Escherichia coli (strain K12) GN=ycgB PE=4 SV=2	7.87627	7.32507	11.0261	10.0284
PputA514_2005	Outer membrane protein assembly factor BamD OS=Pseudomonas aeruginosa (strain ATCC 15692 / PAO1 / 1C / PRS 101 / LMG 12228) GN=bamD PE=3 SV=2	10.523	10.1551	10.9394	10.0247
PputA514_5488	ATP-dependent Clp protease proteolytic subunit 2 OS=Myxococcus xanthus (strain DK 1622) GN=clpP2 PE=3 SV=1	0	0	9.29656	10.0194
PputA514_4744	Leucine--tRNA ligase OS=Pseudomonas fluorescens (strain SBW25) GN=leuS PE=3 SV=1	9.83075	10.2883	9.85671	10.0189
PputA514_2002	Chaperone protein ClpB OS=Pseudomonas syringae pv. tomato (strain DC3000) GN=clpB PE=3 SV=1	10.6844	9.78399	9.80576	10.0126
PputA514_1882	Lipopolysaccharide export system ATP-binding protein LptB (Fragment) OS=Pseudomonas putida GN=lptB PE=3 SV=1	5.194	5.79998	10.681	10.0122
PputA514_3255	Bifunctional protein FolD OS=Pseudomonas fluorescens (strain Pf0-1) GN=folD PE=3 SV=1	4.40152	8.11277	9.58023	10.0122
PputA514_5585	Ycf48-like protein OS=Synechococcus sp. (strain CC9902) GN=Syncc9902_0228 PE=3 SV=1	0	0	9.50421	10.0111
PputA514_0211	-	10.9657	4.56018	4.80344	10.0034
PputA514_1959	Lysine/ornithine decarboxylase OS=Selenomonas ruminantium GN=ldc PE=1 SV=1	9.36711	9.89398	9.62055	10.003
PputA514_3248	Peptidyl-prolyl cis-trans isomerase D OS=Escherichia coli (strain K12) GN=ppiD PE=1 SV=1	8.71474	9.93504	9.84543	10.0023
PputA514_6287	5-hydroxyisourate hydrolase OS=Pseudomonas aeruginosa (strain ATCC 15692 / PAO1 / 1C / PRS 101 / LMG 12228) GN=PA1518 PE=3 SV=1	0	0	10.1651	9.99909
PputA514_1574	-	0	0	0	9.99818
PputA514_5860	Proline iminopeptidase OS=Xylella fastidiosa (strain 9a5c) GN=pip PE=3 SV=1	9.607	10.666	10.6925	9.99661
PputA514_6240	-	13.6735	12.8413	11.965	9.99296
PputA514_2392	Disulfide-bond oxidoreductase YfcG OS=Escherichia coli (strain K12) GN=yfcG PE=1 SV=1	9.46232	9.95991	10.2217	9.98821
PputA514_0166	Guanylate kinase OS=Pseudomonas fluorescens (strain Pf0-1) GN=gmk PE=3 SV=1	9.62436	9.88337	9.32272	9.97544
PputA514_0985	Esterase TesA OS=Pseudomonas aeruginosa (strain ATCC 15692 / PAO1 / 1C / PRS 101 / LMG 12228) GN=tesA PE=1 SV=1	9.28417	3.81603	9.58476	9.97452
PputA514_0110	Phosphate-binding protein PstS OS=Staphylococcus epidermidis (strain ATCC 35984 / RP62A) GN=pstS PE=3 SV=1	10.0763	9.9567	9.67091	9.97101
PputA514_0083	Histone acetyltransferase HPA2 OS=Saccharomyces cerevisiae (strain ATCC 204508 / S288c) GN=HPA2 PE=1 SV=1	11.57	9.69576	8.82601	9.96384
PputA514_4589	Uncharacterized protein Mb2027c OS=Mycobacterium bovis (strain ATCC BAA-935 / AF2122/97) GN=Mb2027c PE=4 SV=1	10.922	10.9156	10.3447	9.962
PputA514_4484	Uncharacterized protein PA5481 OS=Pseudomonas aeruginosa (strain ATCC 15692 / PAO1 / 1C / PRS 101 / LMG 12228) GN=PA5481 PE=3 SV=1	8.83006	4.66804	10.0166	9.96182
PputA514_1351	Protein LemA OS=Streptococcus gordonii (strain Challis / ATCC 35105 / CH1 / DL1 / V288) GN=lemA PE=2 SV=1	10.938	9.38966	11.6796	9.96141
PputA514_3075	Sulfurtransferase TusD homolog OS=Pseudomonas aeruginosa (strain ATCC 15692 / PAO1 / 1C / PRS 101 / LMG 12228) GN=tusD PE=3 SV=1	4.86889	4.13396	9.98685	9.95829
PputA514_4525	Carbonic anhydrase 1 OS=Escherichia coli (strain K12) GN=cynT PE=1 SV=1	8.53159	9.98041	10.3497	9.94465
PputA514_0731	Probable succinyl-CoA:3-ketoacid coenzyme A transferase subunit A OS=Bacillus subtilis (strain 168) GN=scoA PE=1 SV=1	3.54738	3.98087	8.93476	9.94401
PputA514_1370	Toluene efflux pump outer membrane protein TtgC OS=Pseudomonas putida (strain DOT-T1E) GN=ttgC PE=2 SV=1	10.2406	11.0086	10.2156	9.94006
PputA514_1453	Deoxycytidine triphosphate deaminase OS=Pseudomonas fluorescens (strain SBW25) GN=dcd PE=3 SV=1	9.2813	5.27153	9.66216	9.93339
PputA514_4929	Tyrosine--tRNA ligase OS=Pseudomonas fluorescens (strain Pf0-1) GN=tyrS PE=3 SV=1	10.7928	10.3994	10.6109	9.92871
PputA514_5451	Putative rhizopine-binding protein OS=Rhizobium meliloti GN=mocB PE=3 SV=1	11.088	10.5928	9.24375	9.92799
PputA514_4213	Phosphogluconate dehydratase OS=Pseudomonas aeruginosa (strain ATCC 15692 / PAO1 / 1C / PRS 101 / LMG 12228) GN=edd PE=3 SV=3	11.4532	4.66392	0	9.92738
PputA514_4312	Histidine--tRNA ligase OS=Pseudomonas fluorescens (strain SBW25) GN=hisS PE=3 SV=1	9.25219	7.95507	10.1558	9.9236
PputA514_1405	High-affinity branched-chain amino acid transport ATP-binding protein BraG OS=Pseudomonas aeruginosa (strain ATCC 15692 / PAO1 / 1C / PRS 101 / LMG 12228) GN=braG PE=3 SV=1	9.32695	11.3195	10.6713	9.92352
PputA514_4978	RNA polymerase sigma factor RpoD OS=Pseudomonas putida GN=rpoD PE=3 SV=1	10.5972	10.1686	11.3383	9.91841
PputA514_5946	Zinc-type alcohol dehydrogenase-like protein MW2112 OS=Staphylococcus aureus (strain MW2) GN=MW2112 PE=3 SV=1	7.93513	8.99514	9.44041	9.90593
PputA514_2561	Phosphoglucomutase OS=Gluconacetobacter xylinus GN=celB PE=3 SV=1	8.10543	8.30833	9.71599	9.90226
PputA514_4634	Carbamoyl-phosphate synthase large chain OS=Pseudomonas syringae pv. tomato (strain DC3000) GN=carB PE=3 SV=1	9.82137	10.1286	9.62558	9.89944
PputA514_3961	Alanine--tRNA ligase OS=Pseudomonas fluorescens (strain Pf0-1) GN=alaS PE=3 SV=1	8.75284	10.1123	9.36921	9.89661
PputA514_0251	Exopolyphosphatase OS=Pseudomonas aeruginosa (strain ATCC 15692 / PAO1 / 1C / PRS 101 / LMG 12228) GN=ppx PE=3 SV=1	9.34721	9.70361	10.2856	9.89067
PputA514_2043	Lipid A deacylase PagL OS=Pseudomonas aeruginosa (strain ATCC 15692 / PAO1 / 1C / PRS 101 / LMG 12228) GN=pagL PE=1 SV=1	10.2446	11.2837	10.5274	9.88974
PputA514_4824	3,4-dihydroxy-2-butanone 4-phosphate synthase OS=Pseudomonas aeruginosa (strain ATCC 15692 / PAO1 / 1C / PRS 101 / LMG 12228) GN=ribB PE=3 SV=1	8.60235	9.85852	9.94747	9.88469
PputA514_5878	Fructose-1,6-bisphosphatase class 1 OS=Pseudomonas fluorescens (strain SBW25) GN=fbp PE=3 SV=1	9.86346	9.00359	9.55414	9.88081
PputA514_1761	Extracellular serine protease OS=Serratia marcescens PE=1 SV=1	5.73031	0	6.14463	9.87694
PputA514_0355	Phosphoenolpyruvate-protein phosphotransferase PtsP OS=Salmonella typhimurium (strain LT2 / SGSC1412 / ATCC 700720) GN=ptsP PE=3 SV=2	8.28413	9.40348	9.40062	9.87347
PputA514_1756	Carboxylesterase 2 OS=Pseudomonas fluorescens GN=estB PE=1 SV=1	10.423	11.5165	9.96506	9.85856
PputA514_3080	Glutathionyl-hydroquinone reductase YqjG OS=Escherichia coli (strain K12) GN=yqjG PE=1 SV=1	0	8.08797	10.3223	9.85687
PputA514_5712	Oligoribonuclease OS=Pseudomonas fluorescens (strain Pf0-1) GN=orn PE=3 SV=1	11.1081	9.82722	9.35424	9.8492
PputA514_2709	-	0	0	10.2801	9.84887
PputA514_0050	Probable fatty acid methyltransferase OS=Pseudomonas putida PE=3 SV=1	8.8748	9.39436	11.7875	9.84373
PputA514_4284	Phosphoribosylformylglycinamidine synthase OS=Pseudomonas fluorescens (strain Pf-5 / ATCC BAA-477) GN=purL PE=3 SV=1	9.53368	10.1732	9.79292	9.8434
PputA514_0225	Argininosuccinate lyase OS=Pseudomonas fluorescens (strain SBW25) GN=argH PE=3 SV=1	10.1348	10.287	10.314	9.83888
PputA514_2287	Molybdate-binding periplasmic protein OS=Azotobacter vinelandii GN=modA PE=3 SV=1	13.0701	3.64233	4.06688	9.8376
PputA514_3294	2-oxoisovalerate dehydrogenase subunit alpha OS=Pseudomonas putida GN=bkdA1 PE=1 SV=2	0	7.57954	10.1157	9.83704
PputA514_2989	Glutathione S-transferase Z2 OS=Arabidopsis thaliana GN=GSTZ2 PE=3 SV=1	9.41576	9.18329	10.8916	9.8368
PputA514_6058	Threonine--tRNA ligase OS=Pseudomonas fluorescens (strain SBW25) GN=thrS PE=3 SV=1	9.56537	10.6977	9.87962	9.82409
PputA514_4163	Uncharacterized protein slr1894 OS=Synechocystis sp. (strain PCC 6803 / Kazusa) GN=slr1894 PE=3 SV=1	13.2262	10.8159	12.3109	9.82296
PputA514_2014	Probable FKBP-type 16 kDa peptidyl-prolyl cis-trans isomerase OS=Pseudomonas fluorescens GN=yaaD PE=3 SV=1	5.26566	10.1947	4.95528	9.82192
PputA514_1240	Putative NADH dehydrogenase/NAD(P)H nitroreductase SCO7141 OS=Streptomyces coelicolor (strain ATCC BAA-471 / A3(2) / M145) GN=SCO7141 PE=3 SV=1	12.4495	12.4859	10.1796	9.81302
PputA514_5993	3-dehydroquinate dehydratase OS=Pseudomonas syringae pv. syringae (strain B728a) GN=aroQ PE=3 SV=1	10.7215	11.6703	10.4783	9.81234
PputA514_1480	Outer membrane protein assembly factor BamA OS=Enterobacter sp. (strain 638) GN=bamA PE=3 SV=1	10.4678	9.94996	10.9239	9.81061
PputA514_1684	Pyridoxine 5'-phosphate synthase OS=Pseudomonas fluorescens (strain SBW25) GN=pdxJ PE=3 SV=1	10.3188	8.76758	9.84438	9.8099
PputA514_2475	Oxaloacetate decarboxylase OS=Pseudomonas fluorescens (strain SBW25) GN=PFLU_3105 PE=3 SV=1	3.38891	9.40226	9.58081	9.80203
PputA514_4825	Riboflavin synthase OS=Photobacterium phosphoreum GN=ribE PE=3 SV=1	9.1173	4.2267	9.99312	9.79561
PputA514_3632	dTDP-glucose 4,6-dehydratase OS=Xanthomonas campestris pv. campestris (strain B100) GN=rfbB PE=3 SV=1	9.64162	9.92948	9.02452	9.78253
PputA514_4067	Long-chain-fatty-acid--CoA ligase OS=Escherichia coli O157:H7 GN=fadD PE=3 SV=1	7.95783	9.17979	10.8515	9.78224
PputA514_0171	Orotate phosphoribosyltransferase OS=Pseudomonas fluorescens (strain SBW25) GN=pyrE PE=3 SV=1	11.5954	12.3022	10.781	9.78205
PputA514_1613	Glutamate/aspartate transport ATP-binding protein GltL OS=Escherichia coli (strain K12) GN=gltL PE=3 SV=1	9.30884	4.55569	8.82501	9.78097
PputA514_4666	Uncharacterized ABC transporter ATP-binding protein HI_1252 OS=Haemophilus influenzae (strain ATCC 51907 / DSM 11121 / KW20 / Rd) GN=HI_1252 PE=1 SV=1	9.83284	11.1232	10.0089	9.78089
PputA514_3908	Flagellar brake protein YcgR OS=Pseudomonas putida (strain KT2440) GN=ycgR PE=1 SV=1	8.09962	9.61719	8.96426	9.77793
PputA514_1037	P-protein OS=Pseudomonas aeruginosa (strain ATCC 15692 / PAO1 / 1C / PRS 101 / LMG 12228) GN=pheA PE=3 SV=1	8.75479	0	5.07925	9.77537
PputA514_0181	Aldehyde dehydrogenase PuuC OS=Escherichia coli (strain K12) GN=puuC PE=1 SV=2	9.39499	10.4613	10.5079	9.77046
PputA514_5897	2,3-bisphosphoglycerate-independent phosphoglycerate mutase OS=Pseudomonas fluorescens (strain Pf0-1) GN=gpmI PE=3 SV=1	9.22504	9.32364	8.58968	9.76962
PputA514_2559	Putative quercetin 2,3-dioxygenase PA1210 OS=Pseudomonas aeruginosa (strain ATCC 15692 / PAO1 / 1C / PRS 101 / LMG 12228) GN=PA1210 PE=3 SV=1	0	4.71927	10.2414	9.76896
PputA514_5539	Hydroxyacyl-thioester dehydratase type 2, mitochondrial OS=Schizosaccharomyces pombe (strain 972 / ATCC 24843) GN=htd2 PE=3 SV=1	0	0	8.9719	9.76732
PputA514_1352	Periplasmic beta-glucosidase OS=Salmonella typhimurium (strain LT2 / SGSC1412 / ATCC 700720) GN=bglX PE=3 SV=2	8.79241	8.76438	9.68376	9.76713
PputA514_4945	Anthranilate phosphoribosyltransferase OS=Pseudomonas fluorescens (strain SBW25) GN=trpD PE=3 SV=1	9.36377	10.2689	9.55767	9.76462
PputA514_1075	Probable malate:quinone oxidoreductase 2 OS=Pseudomonas putida (strain KT2440) GN=mqo2 PE=3 SV=1	7.08521	8.29001	9.85854	9.76355
PputA514_4532	Oligopeptidase A OS=Haemophilus influenzae (strain ATCC 51907 / DSM 11121 / KW20 / Rd) GN=prlC PE=3 SV=1	10.0609	10.6447	9.82521	9.76351
PputA514_6051	Integration host factor subunit alpha OS=Pseudomonas syringae pv. syringae (strain B728a) GN=ihfA PE=3 SV=1	11.2472	0	10.7804	9.75917
PputA514_0078	2-oxoglutarate carboxylase small subunit OS=Hydrogenobacter thermophilus (strain DSM 6534 / IAM 12695 / TK-6) GN=cfiB PE=1 SV=1	9.58371	8.94757	9.61842	9.75612
PputA514_2565	Quinone oxidoreductase 1 OS=Escherichia coli (strain K12) GN=qorA PE=1 SV=1	10.1273	9.59905	10.055	9.75254
PputA514_2300	Glutathione reductase OS=Pseudomonas aeruginosa (strain ATCC 15692 / PAO1 / 1C / PRS 101 / LMG 12228) GN=gor PE=3 SV=1	8.08577	9.10332	9.08191	9.75213
PputA514_4170	UPF0234 protein PFLU_4927 OS=Pseudomonas fluorescens (strain SBW25) GN=PFLU_4927 PE=3 SV=1	11.615	11.65	11.2692	9.74606
PputA514_5595	Uncharacterized oxidoreductase PA1252 OS=Pseudomonas aeruginosa (strain ATCC 15692 / PAO1 / 1C / PRS 101 / LMG 12228) GN=PA1252 PE=3 SV=1	9.66436	10.6718	10.3509	9.74003
PputA514_1280	4-hydroxy-tetrahydrodipicolinate synthase OS=Pseudomonas syringae pv. syringae (strain B728a) GN=dapA PE=3 SV=1	4.04243	9.21538	8.23444	9.73737
PputA514_3013	D-xylose-binding periplasmic protein OS=Escherichia coli (strain K12) GN=xylF PE=1 SV=1	8.13048	9.5441	9.76358	9.7291
PputA514_0418	Glutathione synthetase OS=Pseudomonas putida (strain KT2440) GN=gshB PE=3 SV=1	9.42652	10.3113	9.93785	9.72207
PputA514_4804	Uncharacterized protein YjfJ OS=Escherichia coli (strain K12) GN=yjfJ PE=3 SV=1	13.1709	10.8273	10.314	9.71899
PputA514_1250	p-hydroxybenzoate hydroxylase OS=Pseudomonas aeruginosa (strain ATCC 15692 / PAO1 / 1C / PRS 101 / LMG 12228) GN=pobA PE=1 SV=1	0	14.7157	10.0812	9.71022
PputA514_3106	NADH-quinone oxidoreductase subunit C/D OS=Pseudomonas fluorescens (strain SBW25) GN=nuoC PE=3 SV=1	9.29875	10.635	10.1851	9.70491
PputA514_4664	NADP-specific glutamate dehydrogenase OS=Salmonella typhimurium (strain LT2 / SGSC1412 / ATCC 700720) GN=gdhA PE=3 SV=2	9.99167	10.3621	9.24633	9.69575
PputA514_4969	UPF0229 protein PFLU_5583 OS=Pseudomonas fluorescens (strain SBW25) GN=PFLU_5583 PE=3 SV=1	3.9066	7.03796	9.56823	9.69471
PputA514_5813	Glutamate synthase [NADPH] large chain OS=Escherichia coli (strain K12) GN=gltB PE=1 SV=3	9.21564	10.1736	9.67369	9.69469
PputA514_4610	Acetyl-coenzyme A synthetase 2 OS=Pseudomonas putida (strain KT2440) GN=acsA2 PE=3 SV=1	8.7802	10.6093	10.8042	9.69427
PputA514_4313	Histidine--tRNA ligase OS=Pseudomonas fluorescens (strain SBW25) GN=hisS PE=3 SV=1	9.67646	9.8328	9.69515	9.69013
PputA514_5890	Nitrogen regulation protein NR(I) OS=Salmonella typhimurium (strain LT2 / SGSC1412 / ATCC 700720) GN=glnG PE=1 SV=2	7.08559	9.21791	9.83358	9.68525
PputA514_1067	LOG family protein YgdH OS=Shigella flexneri GN=ygdH PE=3 SV=1	9.7053	9.56916	9.65285	9.68399
PputA514_1789	Glyoxylate/hydroxypyruvate reductase B OS=Serratia proteamaculans (strain 568) GN=ghrB PE=3 SV=1	8.4273	10.7883	9.52708	9.66966
PputA514_2625	-	0	7.168	9.46347	9.66152
PputA514_1810	UDP-N-acetylmuramate--L-alanine ligase OS=Pseudomonas fluorescens (strain SBW25) GN=murC PE=3 SV=1	8.87944	9.51359	9.37681	9.65736
PputA514_6399	Aromatic-amino-acid aminotransferase OS=Pseudomonas aeruginosa (strain ATCC 15692 / PAO1 / 1C / PRS 101 / LMG 12228) GN=phhC PE=3 SV=2	9.3234	9.77911	9.83145	9.65471
PputA514_1383	3-oxoadipate CoA-transferase subunit A OS=Pseudomonas sp. (strain B13) GN=catI PE=1 SV=1	3.89899	11.9208	11.0669	9.65188
PputA514_5937	C-factor OS=Myxococcus xanthus GN=csgA PE=1 SV=1	9.91599	4.70092	9.86353	9.64777
PputA514_2780	CBS domain-containing protein YhcV OS=Bacillus subtilis (strain 168) GN=yhcV PE=4 SV=1	10.1508	0	9.98719	9.6399
PputA514_4310	Outer membrane protein assembly factor BamB OS=Pseudomonas aeruginosa (strain ATCC 15692 / PAO1 / 1C / PRS 101 / LMG 12228) GN=bamB PE=1 SV=1	8.68594	9.98497	9.20551	9.63848
PputA514_3516	Sulfate-binding protein OS=Shigella flexneri GN=sbp PE=3 SV=1	9.62074	8.39238	8.83765	9.63465
PputA514_5644	Curved DNA-binding protein OS=Pseudomonas putida (strain W619) GN=cbpA PE=3 SV=1	8.48173	10.262	11.1737	9.63382
PputA514_5693	Ribonuclease R OS=Haemophilus influenzae (strain ATCC 51907 / DSM 11121 / KW20 / Rd) GN=rnr PE=3 SV=1	7.03605	9.05668	9.95813	9.62533
PputA514_5276	Creatinine amidohydrolase OS=Pseudomonas putida GN=crnA PE=1 SV=1	11.0091	10.1585	8.94974	9.62278
PputA514_0133	Protein ClpV1 OS=Pseudomonas aeruginosa (strain ATCC 15692 / PAO1 / 1C / PRS 101 / LMG 12228) GN=clpV1 PE=1 SV=1	8.55931	6.55467	9.21196	9.61938
PputA514_1555	Glycerol metabolism activator OS=Pseudomonas putida GN=agmR PE=3 SV=1	7.64377	8.66858	9.3383	9.61457
PputA514_0234	Transcriptional regulatory protein AlgP OS=Pseudomonas aeruginosa (strain ATCC 15692 / PAO1 / 1C / PRS 101 / LMG 12228) GN=algP PE=4 SV=2	10.1061	9.8893	8.92661	9.6136
PputA514_5733	ADP-ribose pyrophosphatase OS=Shigella flexneri GN=nudF PE=3 SV=1	10.0324	9.83516	10.2943	9.60851
PputA514_5810	Glutamate synthase [NADPH] small chain OS=Escherichia coli (strain K12) GN=gltD PE=1 SV=3	9.22354	10.0867	9.77858	9.59432
PputA514_1458	5'-nucleotidase SurE OS=Pseudomonas fluorescens (strain SBW25) GN=surE PE=3 SV=1	4.28887	9.25596	9.50799	9.59074
PputA514_6350	Protein phosphatase CheZ OS=Pseudomonas putida (strain KT2440) GN=cheZ PE=3 SV=1	10.2887	8.96953	9.97031	9.58783
PputA514_1543	Glucans biosynthesis protein D OS=Pseudomonas fluorescens (strain SBW25) GN=opgD PE=3 SV=1	4.16635	8.84399	9.36698	9.58531
PputA514_3442	Probable UDP-N-acetylglucosamine--peptide N-acetylglucosaminyltransferase SEC OS=Arabidopsis thaliana GN=SEC PE=2 SV=1	7.58012	3.63213	8.72826	9.58447
PputA514_2055	Ribosome-binding ATPase YchF OS=Pasteurella multocida (strain Pm70) GN=ychF PE=3 SV=3	10.3678	10.4927	9.4823	9.58347
PputA514_2347	UDP-glucose 6-dehydrogenase OS=Pseudomonas aeruginosa (strain ATCC 15692 / PAO1 / 1C / PRS 101 / LMG 12228) GN=udg PE=3 SV=2	8.4248	7.71264	9.54331	9.57688
PputA514_3821	L-arabinose-binding periplasmic protein OS=Escherichia coli (strain K12) GN=araF PE=1 SV=2	9.21687	7.99872	8.50175	9.57049
PputA514_1690	Elongation factor 4 OS=Pseudomonas fluorescens (strain SBW25) GN=lepA PE=3 SV=1	8.07352	9.30715	9.81993	9.56845
PputA514_0933	Molybdenum cofactor biosynthesis protein B OS=Escherichia coli (strain K12) GN=moaB PE=1 SV=2	5.27821	9.60063	10.2092	9.56692
PputA514_0143	hypothetical protein	3.23258	0	9.42732	9.56204
PputA514_0250	Polyphosphate kinase OS=Pseudomonas syringae pv. tomato (strain DC3000) GN=ppk PE=3 SV=1	7.91641	9.32278	9.518	9.56158
PputA514_4124	Ornithine carbamoyltransferase, catabolic OS=Pseudomonas aeruginosa (strain ATCC 15692 / PAO1 / 1C / PRS 101 / LMG 12228) GN=arcB PE=1 SV=3	12.4841	9.62271	8.38336	9.55639
PputA514_1225	UPF0271 protein PFL_1513 OS=Pseudomonas fluorescens (strain Pf-5 / ATCC BAA-477) GN=PFL_1513 PE=3 SV=1	0	0	9.7539	9.55271
PputA514_4927	dTDP-4-dehydrorhamnose 3,5-epimerase OS=Pseudomonas aeruginosa (strain ATCC 15692 / PAO1 / 1C / PRS 101 / LMG 12228) GN=rmlC PE=1 SV=1	9.94254	9.42362	9.08537	9.55089
PputA514_3189	Glutamine--tRNA ligase OS=Pseudomonas syringae pv. tomato (strain DC3000) GN=glnS PE=3 SV=1	8.91497	9.21768	9.8471	9.55083
PputA514_0318	Putrescine-binding periplasmic protein OS=Escherichia coli (strain K12) GN=potF PE=1 SV=3	9.36022	8.96211	9.75431	9.54785
PputA514_2846	Gamma-glutamyltranspeptidase OS=Pseudomonas sp. (strain A14) GN=ggt PE=1 SV=1	8.62443	10.4417	9.84376	9.5468
PputA514_6303	Probable M18 family aminopeptidase 2 OS=Pseudomonas fluorescens (strain SBW25) GN=apeB PE=3 SV=1	8.97574	9.05608	9.71961	9.54047
PputA514_6039	7-cyano-7-deazaguanine synthase OS=Leptothrix cholodnii (strain ATCC 51168 / LMG 8142 / SP-6) GN=queC PE=3 SV=1	7.53448	9.22025	9.17981	9.53882
PputA514_1867	Histidinol dehydrogenase OS=Pseudomonas fluorescens (strain Pf0-1) GN=hisD PE=3 SV=1	0	4.27217	7.80085	9.53854
PputA514_1029	dTDP-3-amino-3,6-dideoxy-alpha-D-galactopyranose transaminase OS=Aneurinibacillus thermoaerophilus GN=fdtB PE=1 SV=1	9.87846	9.65701	7.76134	9.53586
PputA514_4656	Putative Lon protease homolog OS=Escherichia coli (strain K12) GN=ycbZ PE=3 SV=1	9.88292	9.80452	10.0354	9.5356
PputA514_0411	Dihydroorotase-like protein OS=Pseudomonas putida GN=pyrC' PE=3 SV=1	8.46663	9.79189	8.74348	9.53375
PputA514_1865	Histidinol-phosphate aminotransferase 1 OS=Pseudomonas fluorescens (strain Pf-5 / ATCC BAA-477) GN=hisC1 PE=3 SV=1	8.79765	10.4111	9.32327	9.52944
PputA514_1893	Protein PmbA OS=Escherichia coli (strain K12) GN=pmbA PE=1 SV=1	8.63225	8.62986	9.91067	9.52662
PputA514_3706	Putative regulator of ribonuclease activity OS=Pseudomonas fluorescens (strain SBW25) GN=PFLU_4617 PE=3 SV=1	10.0034	9.65971	7.4906	9.52073
PputA514_1305	3-hydroxyisobutyryl-CoA hydrolase, mitochondrial OS=Danio rerio GN=hibch PE=2 SV=1	0	3.67193	9.33011	9.51936
PputA514_0245	Enhancing lycopene biosynthesis protein 2 OS=Shigella flexneri GN=elbB PE=3 SV=1	4.73583	4.38439	8.50483	9.51879
PputA514_1440	Disulfide-bond oxidoreductase YfcG OS=Escherichia coli (strain K12) GN=yfcG PE=1 SV=1	8.1572	0	9.94805	9.5168
PputA514_0656	MetA-pathway phenol degradation-like protein	0	10.8234	5.28918	9.51394
PputA514_5827	50S ribosomal protein L31 OS=Pseudomonas fluorescens (strain SBW25) GN=rpmE PE=3 SV=1	11.0544	0	4.43812	9.51034
PputA514_6381	Nitrogen assimilation regulatory protein NtrC OS=Azorhizobium caulinodans (strain ATCC 43989 / DSM 5975 / ORS 571) GN=ntrC PE=3 SV=2	8.32756	9.00609	9.50809	9.50909
PputA514_4180	Uncharacterized protein YjgR OS=Escherichia coli (strain K12) GN=yjgR PE=4 SV=1	0	4.73993	3.89977	9.50338
PputA514_5611	Putative 6-phosphogluconate dehydrogenase YqeC OS=Bacillus subtilis (strain 168) GN=yqeC PE=3 SV=1	9.82505	9.92329	9.03194	9.50338
PputA514_1579	-	0	0	0	9.50138
PputA514_6436	Phosphoribosylformylglycinamidine cyclo-ligase OS=Pseudomonas fluorescens (strain SBW25) GN=purM PE=3 SV=1	10.4279	11.6357	10.2018	9.49499
PputA514_4257	Thiol:disulfide interchange protein DsbC OS=Salmonella typhimurium (strain LT2 / SGSC1412 / ATCC 700720) GN=dsbC PE=1 SV=2	3.95985	7.92264	3.60731	9.49441
PputA514_1705	Nucleoid-associated protein PFL_1060 OS=Pseudomonas fluorescens (strain Pf-5 / ATCC BAA-477) GN=PFL_1060 PE=3 SV=1	8.46841	8.44346	10.1955	9.49004
PputA514_0406	Pyrroline-5-carboxylate reductase OS=Pseudomonas aeruginosa (strain ATCC 15692 / PAO1 / 1C / PRS 101 / LMG 12228) GN=proC PE=1 SV=2	8.54092	9.92098	9.06651	9.48952
PputA514_0833	2,5-dichloro-2,5-cyclohexadiene-1,4-diol dehydrogenase OS=Sphingomonas paucimobilis GN=linC PE=2 SV=1	0	0	8.51726	9.48279
PputA514_5392	Sulfite reductase [ferredoxin] OS=Mycobacterium tuberculosis GN=sir PE=1 SV=2	10.4991	10.995	9.33914	9.48122
PputA514_0853	Pirin-like protein CC_3178 OS=Caulobacter crescentus (strain ATCC 19089 / CB15) GN=CC_3178 PE=3 SV=1	9.36347	7.90861	9.93158	9.46578
PputA514_4076	Glucose-6-phosphate 1-dehydrogenase OS=Pseudomonas aeruginosa (strain ATCC 15692 / PAO1 / 1C / PRS 101 / LMG 12228) GN=zwf PE=1 SV=1	10.4965	7.73544	9.2553	9.45778
PputA514_5881	Glycogen phosphorylase OS=Shigella flexneri GN=glgP PE=3 SV=1	7.27826	4.18869	9.23008	9.45656
PputA514_5466	-	13.6203	5.25796	10.1965	9.45448
PputA514_0804	Recombination-associated protein RdgC OS=Pseudomonas fluorescens (strain SBW25) GN=rdgC PE=3 SV=1	8.54495	8.40879	9.50778	9.44356
PputA514_1485	Ribosome-recycling factor OS=Pseudomonas fluorescens (strain SBW25) GN=frr PE=3 SV=1	12.3881	10.5531	11.0356	9.4344
PputA514_6306	Thermostable carboxypeptidase 2 OS=Sulfolobus solfataricus (strain ATCC 35092 / DSM 1617 / JCM 11322 / P2) GN=cpsA2 PE=3 SV=1	3.07274	3.24142	8.98538	9.43059
PputA514_3208	Isovaleryl-CoA dehydrogenase, mitochondrial OS=Oryza sativa subsp. japonica GN=Os05g0125500 PE=2 SV=2	0	8.11604	10.2408	9.42706
PputA514_3567	Protein YdgA OS=Escherichia coli (strain K12) GN=ydgA PE=1 SV=1	9.34233	8.49867	9.67365	9.42222
PputA514_4110	Uncharacterized protein YciO OS=Shigella flexneri GN=yciO PE=3 SV=1	0	0	9.08309	9.41711
PputA514_5558	Hydroxyphenylpyruvate reductase OS=Plectranthus scutellarioides GN=HPPR PE=1 SV=2	7.09491	9.52337	9.70545	9.40792
PputA514_1846	Mitochondrial metalloendopeptidase OMA1 OS=Schizosaccharomyces pombe (strain 972 / ATCC 24843) GN=oma1 PE=3 SV=1	12.4688	11.1722	11.249	9.40775
PputA514_6053	Phenylalanine--tRNA ligase alpha subunit OS=Pseudomonas fluorescens (strain SBW25) GN=pheS PE=3 SV=1	0	9.34554	8.99833	9.40107
PputA514_1182	Soluble pyridine nucleotide transhydrogenase OS=Pseudomonas fluorescens (strain SBW25) GN=sthA PE=3 SV=1	9.15187	10.4052	10.2624	9.40028
PputA514_6002	Phosphoribosylamine--glycine ligase OS=Pseudomonas syringae pv. tomato (strain DC3000) GN=purD PE=3 SV=1	9.19418	9.71048	9.345	9.39928
PputA514_2129	-	4.26746	9.00562	10.3121	9.39815
PputA514_6090	O-succinylhomoserine sulfhydrylase OS=Pseudomonas aeruginosa (strain ATCC 15692 / PAO1 / 1C / PRS 101 / LMG 12228) GN=metZ PE=1 SV=1	8.88672	8.69284	9.7646	9.3961
PputA514_1730	Fumarylacetoacetase OS=Rattus norvegicus GN=Fah PE=1 SV=1	0	8.89848	10.8917	9.39127
PputA514_4830	Uncharacterized protein YbbN OS=Escherichia coli (strain K12) GN=ybbN PE=1 SV=2	10.5502	10.042	9.86831	9.38407
PputA514_4315	Cytoskeleton protein RodZ OS=Erwinia carotovora subsp. atroseptica (strain SCRI 1043 / ATCC BAA-672) GN=rodZ PE=3 SV=1	0	0	4.66705	9.38322
PputA514_2619	4-carboxy-4-hydroxy-2-oxoadipic acid aldolase OS=Pseudomonas putida (strain KT2440) GN=galC PE=1 SV=1	0	4.16225	9.83591	9.37744
PputA514_0227	Porphobilinogen deaminase OS=Pseudomonas fluorescens (strain SBW25) GN=hemC PE=3 SV=1	10.0915	9.55745	9.27899	9.37191
PputA514_3297	Dihydrolipoyl dehydrogenase OS=Pseudomonas putida GN=lpdV PE=1 SV=1	0	3.22668	9.84286	9.36612
PputA514_4175	Arginine biosynthesis bifunctional protein ArgJ OS=Pseudomonas fluorescens (strain Pf-5 / ATCC BAA-477) GN=argJ PE=3 SV=1	10.6003	10.1654	9.30621	9.36173
PputA514_4946	Anthranilate synthase component 2 OS=Pseudomonas putida GN=trpG PE=1 SV=2	4.16537	9.5179	9.96317	9.35861
PputA514_5971	Glycerol metabolism activator OS=Pseudomonas aeruginosa (strain ATCC 15692 / PAO1 / 1C / PRS 101 / LMG 12228) GN=agmR PE=3 SV=1	0	0	10.3306	9.35725
PputA514_3091	ATP-dependent Clp protease ATP-binding subunit ClpA OS=Escherichia coli (strain K12) GN=clpA PE=1 SV=1	9.37489	9.92347	9.40393	9.355
PputA514_2178	3-demethylubiquinone-9 3-methyltransferase	4.10791	4.48417	9.78695	9.35137
PputA514_2527	-	4.40152	0	9.35051	9.34547
PputA514_1183	hypothetical protein	0	0	8.13992	9.34242
PputA514_5707	tRNA threonylcarbamoyladenosine biosynthesis protein TsaE OS=Shigella flexneri GN=tsaE PE=3 SV=1	7.82079	4.79492	10.0651	9.34134
PputA514_1435	Outer membrane porin F OS=Pseudomonas aeruginosa (strain ATCC 15692 / PAO1 / 1C / PRS 101 / LMG 12228) GN=oprF PE=1 SV=1	3.59674	4.27306	10.1303	9.33692
PputA514_1822	LppC family lipoprotein	10.0001	10.3272	9.60108	9.33426
PputA514_6116	Glutamate--tRNA ligase OS=Pseudomonas fluorescens (strain Pf-5 / ATCC BAA-477) GN=gltX PE=3 SV=1	8.26714	8.66618	9.56901	9.33426
PputA514_1731	Homogentisate 1,2-dioxygenase OS=Pseudomonas fluorescens (strain Pf-5 / ATCC BAA-477) GN=hmgA PE=3 SV=1	7.32151	8.4151	10.122	9.32588
PputA514_5743	-	0	8.91225	8.41302	9.32303
PputA514_0177	Periplasmic dipeptide transport protein OS=Escherichia coli (strain K12) GN=dppA PE=1 SV=1	8.21728	9.57832	10.1979	9.31961
PputA514_3974	Arginine/ornithine transport ATP-binding protein AotP OS=Pseudomonas aeruginosa (strain ATCC 15692 / PAO1 / 1C / PRS 101 / LMG 12228) GN=aotP PE=3 SV=2	9.84721	10.2273	9.38902	9.318
PputA514_0170	Exodeoxyribonuclease OS=Bacillus subtilis (strain 168) GN=exoA PE=1 SV=1	8.17434	8.99163	8.48344	9.31746
PputA514_5697	Methyl-accepting chemotaxis protein PA2652 OS=Pseudomonas aeruginosa (strain ATCC 15692 / PAO1 / 1C / PRS 101 / LMG 12228) GN=PA2652 PE=4 SV=1	7.99894	9.55207	8.42132	9.31733
PputA514_4494	Cytochrome c4 OS=Pseudomonas stutzeri GN=cc4 PE=1 SV=1	13.0185	12.1199	9.14169	9.31473
PputA514_4649	-	10.8123	0	0	9.31069
PputA514_5337	Inositol 2-dehydrogenase OS=Pseudomonas fluorescens (strain SBW25) GN=iolG PE=3 SV=1	8.00635	9.65512	9.84092	9.30318
PputA514_4130	Aminomethyltransferase, mitochondrial OS=Dictyostelium discoideum GN=gcvT PE=3 SV=1	3.99542	3.84392	9.89957	9.29186
PputA514_5598	-	15.0308	4.40728	11.5223	9.28252
PputA514_6301	Cell division topological specificity factor OS=Pseudomonas fluorescens (strain SBW25) GN=minE PE=3 SV=1	11.9834	5.74146	11.2689	9.28098
PputA514_0168	Ribonuclease PH OS=Pseudomonas fluorescens (strain SBW25) GN=rph PE=3 SV=1	8.69928	3.66393	9.59786	9.27759
PputA514_3105	NADH-quinone oxidoreductase subunit B OS=Pseudomonas fluorescens (strain SBW25) GN=nuoB PE=3 SV=1	9.81001	9.99888	10.6219	9.26963
PputA514_5238	alkane oxidation PraB	0	4.25885	9.72767	9.26919
PputA514_1943	Heme-binding protein A OS=Haemophilus influenzae (strain ATCC 51907 / DSM 11121 / KW20 / Rd) GN=hbpA PE=1 SV=2	11.0767	10.5166	4.98473	9.26642
PputA514_0842	Putative esterase PA1618 OS=Pseudomonas aeruginosa (strain ATCC 15692 / PAO1 / 1C / PRS 101 / LMG 12228) GN=PA1618 PE=3 SV=1	4.16903	9.759	4.46986	9.26611
PputA514_5297	Carboxynorspermidine synthase OS=Vibrio cholerae serotype O1 (strain ATCC 39315 / El Tor Inaba N16961) GN=VC_1624 PE=1 SV=1	8.50433	9.16068	8.89842	9.26073
PputA514_4948	Anthranilate synthase component 1 OS=Pseudomonas syringae pv. savastanoi GN=trpE PE=3 SV=1	7.71563	9.34365	9.12071	9.25262
PputA514_3232	Probable transcriptional regulatory protein Pfl01_3677 OS=Pseudomonas fluorescens (strain Pf0-1) GN=Pfl01_3677 PE=1 SV=1	9.02213	9.95064	10.5638	9.25022
PputA514_3645	-	12.0606	11.3258	9.84654	9.24481
PputA514_3200	Exodeoxyribonuclease III OS=Escherichia coli (strain K12) GN=xthA PE=1 SV=4	3.93798	3.87144	9.84744	9.23917
PputA514_0381	Phosphopantetheine adenylyltransferase OS=Pseudomonas fluorescens (strain SBW25) GN=coaD PE=3 SV=1	11.7199	11.0783	11.0376	9.23786
PputA514_0157	Hydrogen peroxide-inducible genes activator OS=Escherichia coli (strain K12) GN=oxyR PE=1 SV=1	8.30222	8.64783	9.36302	9.23784
PputA514_3295	2-oxoisovalerate dehydrogenase subunit beta OS=Pseudomonas putida GN=bkdA2 PE=1 SV=1	0	7.70677	10.9351	9.23607
PputA514_1588	Methionine--tRNA ligase OS=Pseudomonas fluorescens (strain SBW25) GN=metG PE=3 SV=1	9.70161	10.4088	10.038	9.2332
PputA514_3266	Hydantoin utilization protein C OS=Pseudomonas sp. (strain NS671) GN=hyuC PE=1 SV=1	0	0	9.26186	9.22738
PputA514_4462	NAD(P) transhydrogenase subunit beta OS=Rhodospirillum rubrum GN=pntB PE=1 SV=1	8.15874	10.2282	10.3549	9.22587
PputA514_5737	Outer membrane protein TolC OS=Vibrio cholerae serotype O1 (strain ATCC 39315 / El Tor Inaba N16961) GN=tolC PE=1 SV=1	9.66023	8.44359	8.43542	9.22286
PputA514_2154	Osmoprotectant uptake system A OS=Dickeya dadantii (strain 3937) GN=ousA PE=3 SV=2	0	0	4.80011	9.2191
PputA514_0761	Uncharacterized protein Mb0911c OS=Mycobacterium bovis (strain ATCC BAA-935 / AF2122/97) GN=Mb0911c PE=4 SV=1	9.86942	0	8.96881	9.21786
PputA514_1754	Putative amino-acid ABC transporter permease protein YhdX OS=Escherichia coli (strain K12) GN=yhdX PE=3 SV=3	7.9878	9.63277	10.2486	9.21587
PputA514_6491	dTDP-3-amino-3,6-dideoxy-alpha-D-galactopyranose 3-N-acetyltransferase OS=Aneurinibacillus thermoaerophilus GN=fdtC PE=1 SV=1	7.69301	8.59204	8.99894	9.21356
PputA514_2031	Dehydrosqualene desaturase OS=Staphylococcus aureus (strain MW2) GN=crtN PE=3 SV=1	8.47834	8.1011	8.83885	9.20643
PputA514_1939	Heme-binding protein A OS=Haemophilus influenzae (strain ATCC 51907 / DSM 11121 / KW20 / Rd) GN=hbpA PE=1 SV=2	8.05736	9.37998	9.93522	9.20048
PputA514_5027	-	11.0439	8.89644	4.94192	9.19601
PputA514_0491	6-carboxy-5,6,7,8-tetrahydropterin synthase OS=Shigella flexneri GN=queD PE=3 SV=1	10.4282	0	9.3341	9.19434
PputA514_4628	ATP-dependent zinc metalloprotease FtsH OS=Shigella flexneri GN=ftsH PE=3 SV=1	9.39215	10.1276	9.25926	9.19373
PputA514_4073	2-dehydro-3-deoxy-phosphogluconate aldolase OS=Pseudomonas putida GN=eda PE=1 SV=2	12.6754	4.22342	9.04004	9.19275
PputA514_3571	Uncharacterized protein YdhJ OS=Escherichia coli (strain K12) GN=ydhJ PE=3 SV=2	0	10.2203	7.92281	9.18879
PputA514_3326	D-ribose-binding protein OS=Bacillus subtilis (strain 168) GN=rbsB PE=3 SV=2	8.69567	8.27602	9.22127	9.18681
PputA514_1395	RNA polymerase-associated protein RapA OS=Pseudomonas fluorescens (strain SBW25) GN=rapA PE=3 SV=1	7.62114	8.6549	9.35984	9.17524
PputA514_5831	ATP-dependent protease subunit HslV OS=Pseudomonas fluorescens (strain SBW25) GN=hslV PE=3 SV=1	4.99826	5.17511	9.93311	9.17329
PputA514_1816	UDP-N-acetylmuramoyl-L-alanyl-D-glutamate--2,6-diaminopimelate ligase OS=Pseudomonas syringae pv. tomato (strain DC3000) GN=murE PE=3 SV=1	6.83938	7.12719	9.11195	9.16827
PputA514_0749	Probable Xaa-Pro aminopeptidase P OS=Penicillium marneffei (strain ATCC 18224 / CBS 334.59 / QM 7333) GN=ampp PE=3 SV=1	9.50205	9.7344	8.97625	9.16551
PputA514_3841	3-oxoacyl-[acyl-carrier-protein] synthase 2 OS=Coxiella burnetii (strain RSA 493 / Nine Mile phase I) GN=fabF PE=1 SV=1	9.03292	10.4051	9.4108	9.15984
PputA514_2314	Putative voltage-gated potassium channel subunit beta OS=Schizosaccharomyces pombe (strain 972 / ATCC 24843) GN=SPCC965.06 PE=3 SV=1	10.7705	11.1616	9.50519	9.15245
PputA514_0449	Ribosomal RNA small subunit methyltransferase E OS=Dickeya dadantii (strain 3937) GN=rsmE PE=3 SV=2	9.90574	9.15411	10.5184	9.14987
PputA514_4999	ATP-dependent dethiobiotin synthetase BioD OS=Pseudomonas aeruginosa (strain ATCC 15692 / PAO1 / 1C / PRS 101 / LMG 12228) GN=bioD PE=3 SV=1	4.06629	9.43097	10.3999	9.1456
PputA514_2204	Long-chain specific acyl-CoA dehydrogenase, mitochondrial OS=Macaca fascicularis GN=ACADL PE=2 SV=1	7.5961	7.59145	8.03675	9.14496
PputA514_1476	3-hydroxyacyl-[acyl-carrier-protein] dehydratase FabZ OS=Pseudomonas fluorescens (strain SBW25) GN=fabZ PE=3 SV=1	0	8.86516	9.23444	9.14444
PputA514_1038	P-protein OS=Pseudomonas aeruginosa (strain ATCC 15692 / PAO1 / 1C / PRS 101 / LMG 12228) GN=pheA PE=3 SV=1	9.8677	9.23156	8.78211	9.14235
PputA514_1929	Tryptophan--tRNA ligase OS=Pseudomonas syringae pv. tomato (strain DC3000) GN=trpS PE=3 SV=1	9.33556	9.93416	9.34424	9.14124
PputA514_5777	Isobutyryl-CoA dehydrogenase, mitochondrial OS=Dictyostelium discoideum GN=acad8 PE=3 SV=1	0	0	9.76918	9.14064
PputA514_3426	Agmatine deiminase OS=Pseudomonas fluorescens (strain SBW25) GN=aguA PE=3 SV=1	8.71602	10.1458	8.94912	9.13838
PputA514_1825	Phosphoheptose isomerase OS=Pseudomonas fluorescens (strain SBW25) GN=gmhA PE=3 SV=1	10.6803	9.81038	9.21724	9.13622
PputA514_0959	ATP-dependent RNA helicase DeaD OS=Buchnera aphidicola subsp. Acyrthosiphon pisum (strain APS) GN=deaD PE=3 SV=1	9.19213	10.0867	9.45594	9.13397
PputA514_3845	Malonyl CoA-acyl carrier protein transacylase OS=Salmonella typhimurium (strain LT2 / SGSC1412 / ATCC 700720) GN=fabD PE=1 SV=3	11.4144	10.8116	9.35757	9.13382
PputA514_3827	Uncharacterized protein HI_0912 OS=Haemophilus influenzae (strain ATCC 51907 / DSM 11121 / KW20 / Rd) GN=HI_0912 PE=4 SV=1	11.02	10.9759	10.2351	9.13188
PputA514_0349	L-threonine dehydratase biosynthetic IlvA OS=Burkholderia multivorans (strain ATCC 17616 / 249) GN=ilvA PE=3 SV=1	9.65653	10.1355	9.08762	9.1312
PputA514_5622	Puromycin-sensitive aminopeptidase OS=Arabidopsis thaliana GN=MPA1 PE=1 SV=1	8.64931	9.39885	8.83943	9.12969
PputA514_4174	8-oxo-dGTP diphosphatase OS=Escherichia coli (strain K12) GN=mutT PE=1 SV=1	8.3965	10.0529	8.70563	9.1246
PputA514_0100	N5-carboxyaminoimidazole ribonucleotide mutase OS=Pseudomonas aeruginosa (strain ATCC 15692 / PAO1 / 1C / PRS 101 / LMG 12228) GN=purE PE=3 SV=2	4.46298	5.10397	9.90702	9.11705
PputA514_5958	Heme/hemopexin transporter protein HuxB OS=Haemophilus influenzae (strain 86-028NP) GN=hxuB PE=3 SV=1	7.03584	0	8.98543	9.1119
PputA514_0475	Shikimate 5-dehydrogenase-like protein HI_0607 OS=Haemophilus influenzae (strain ATCC 51907 / DSM 11121 / KW20 / Rd) GN=HI_0607 PE=1 SV=1	9.17968	9.88398	9.26301	9.10803
PputA514_0006	Membrane protein insertase YidC OS=Pseudomonas fluorescens (strain SBW25) GN=yidC PE=3 SV=1	8.47742	9.18354	8.99506	9.09801
PputA514_3188	Cysteine--tRNA ligase OS=Pseudomonas fluorescens (strain SBW25) GN=cysS PE=3 SV=1	8.86883	9.42194	9.26867	9.09499
PputA514_5940	Adenine deaminase OS=Pseudomonas fluorescens (strain SBW25) GN=PFLU_0667 PE=3 SV=1	10.3521	9.90762	9.43464	9.09467
PputA514_6099	-	9.86199	9.39104	9.59512	9.09432
PputA514_0343	D-2-hydroxyglutarate dehydrogenase, mitochondrial OS=Danio rerio GN=d2hgdh PE=2 SV=1	7.80849	9.46483	9.16557	9.09432
PputA514_4314	4-hydroxy-3-methylbut-2-en-1-yl diphosphate synthase OS=Pseudomonas fluorescens (strain SBW25) GN=ispG PE=3 SV=1	9.27486	8.02752	8.60429	9.09322
PputA514_2342	Acyl-CoA dehydrogenase OS=Bacillus subtilis (strain 168) GN=mmgC PE=2 SV=3	8.94538	8.69392	9.61423	9.09013
PputA514_1193	Probable HTH-type transcriptional regulator YttP OS=Bacillus subtilis (strain 168) GN=yttP PE=2 SV=1	9.97558	8.17846	9.41622	9.08926
PputA514_0027	Glutamine--fructose-6-phosphate aminotransferase [isomerizing] OS=Pseudomonas putida (strain KT2440) GN=glmS PE=3 SV=2	8.19545	9.07514	9.24383	9.08126
PputA514_3296	Lipoamide acyltransferase component of branched-chain alpha-keto acid dehydrogenase complex OS=Pseudomonas putida GN=bkdB PE=3 SV=1	0	6.92331	9.33631	9.08002
PputA514_4286	Phosphoribosylformylglycinamidine synthase OS=Pseudomonas fluorescens (strain Pf0-1) GN=purL PE=3 SV=1	10.5166	10.8148	9.25318	9.07787
PputA514_2338	3-hydroxyacyl-CoA dehydrogenase type-2 OS=Drosophila melanogaster GN=scu PE=1 SV=1	0	3.64795	8.13743	9.06962
PputA514_1557	-	10.6125	9.52613	8.73445	9.06843
PputA514_4080	Maltodextrin import ATP-binding protein MsmX OS=Bacillus subtilis (strain 168) GN=msmX PE=3 SV=1	12.7841	0	0	9.06843
PputA514_1886	UPF0042 nucleotide-binding protein PFLU_0879 OS=Pseudomonas fluorescens (strain SBW25) GN=PFLU_0879 PE=3 SV=1	9.20596	9.83401	9.58887	9.06762
PputA514_1699	Valine--tRNA ligase OS=Pseudomonas fluorescens (strain Pf-5 / ATCC BAA-477) GN=valS PE=3 SV=1	9.90766	10.1809	9.328	9.06567
PputA514_4504	-	11.9411	10.8091	10.1783	9.06491
PputA514_1172	NADPH-dependent 7-cyano-7-deazaguanine reductase OS=Pseudomonas fluorescens (strain SBW25) GN=queF PE=3 SV=1	4.58309	8.31495	8.75295	9.06476
PputA514_6052	Phenylalanine--tRNA ligase beta subunit OS=Pseudomonas fluorescens (strain Pf0-1) GN=pheT PE=3 SV=1	9.02977	9.67023	9.35207	9.06203
PputA514_1603	Ornithine carbamoyltransferase 1, phaseolotoxin-sensitive OS=Pseudomonas syringae pv. phaseolicola GN=argF PE=1 SV=3	4.46152	3.8378	9.51707	9.05859
PputA514_0619	Isoquinoline 1-oxidoreductase subunit alpha OS=Brevundimonas diminuta GN=iorA PE=1 SV=1	4.33833	8.93983	4.72411	9.05814
PputA514_0301	Amino-acid acetyltransferase OS=Pseudomonas fluorescens (strain SBW25) GN=argA PE=3 SV=1	3.59895	4.06017	9.16434	9.05182
PputA514_4994	Short/branched chain specific acyl-CoA dehydrogenase, mitochondrial OS=Homo sapiens GN=ACADSB PE=1 SV=1	0	0	9.33333	9.05111
PputA514_0955	Glutamate-pyruvate aminotransferase AlaA OS=Shigella flexneri GN=alaA PE=3 SV=1	8.46224	9.76526	10.0019	9.05028
PputA514_1468	2-dehydro-3-deoxyphosphooctonate aldolase OS=Pseudomonas fluorescens (strain SBW25) GN=kdsA PE=3 SV=1	9.25668	10.9482	8.93458	9.05005
PputA514_6267	Chorismate synthase OS=Pseudomonas fluorescens (strain SBW25) GN=aroC PE=3 SV=1	8.74504	9.14936	8.4001	9.04691
PputA514_4522	Probable cytochrome c oxidase subunit 2 OS=Rickettsia conorii (strain ATCC VR-613 / Malish 7) GN=ctaC PE=3 SV=1	3.75493	8.11205	11.1502	9.04504
PputA514_1558	Cytokinin riboside 5'-monophosphate phosphoribohydrolase LOG3 OS=Arabidopsis thaliana GN=LOG3 PE=1 SV=1	9.81683	10.457	8.75747	9.0417
PputA514_2607	Putative aldehyde dehydrogenase YfmT OS=Bacillus subtilis (strain 168) GN=yfmT PE=2 SV=1	8.18881	8.1154	9.75081	9.04106
PputA514_0622	Alcohol dehydrogenase cytochrome c subunit OS=Gluconacetobacter polyoxogenes GN=adhB PE=1 SV=1	8.37479	10.2832	10.6684	9.0399
PputA514_2397	-	4.60758	0	11.1023	9.0326
PputA514_1534	Phytochrome-like protein cph2 OS=Synechocystis sp. (strain PCC 6803 / Kazusa) GN=cph2 PE=1 SV=1	3.28667	4.11643	8.44857	9.02363
PputA514_1426	Probable lipoprotein YiaD OS=Escherichia coli (strain K12) GN=yiaD PE=1 SV=2	9.9801	8.78119	3.63081	9.01801
PputA514_6241	Fumarate hydratase class II OS=Pseudomonas syringae pv. tomato (strain DC3000) GN=fumC PE=1 SV=1	9.66132	0	9.34467	9.0177
PputA514_1486	Uridylate kinase OS=Pseudomonas fluorescens (strain Pf-5 / ATCC BAA-477) GN=pyrH PE=3 SV=1	4.58716	9.81415	7.89095	9.0174
PputA514_5123	Heme/hemopexin transporter protein HuxB OS=Haemophilus influenzae (strain 86-028NP) GN=hxuB PE=3 SV=1	6.94056	0	8.89018	9.01667
PputA514_4642	Outer membrane protein assembly factor BamE OS=Pseudomonas fluorescens GN=bamE PE=3 SV=1	11.3806	11.5369	10.2452	9.01458
PputA514_0846	Glycerol-3-phosphate dehydrogenase [NAD(P)+] OS=Pseudomonas fluorescens (strain SBW25) GN=gpsA PE=3 SV=1	7.19258	7.93384	8.59559	9.01357
PputA514_1247	methyl-accepting chemotaxis sensory transducer	8.1482	3.58566	8.74257	9.00782
PputA514_1866	Histidinol dehydrogenase OS=Pseudomonas fluorescens (strain Pf-5 / ATCC BAA-477) GN=hisD PE=1 SV=2	9.01123	10.2873	9.29278	9.00458
PputA514_4458	Glutaryl-CoA dehydrogenase, mitochondrial OS=Dictyostelium discoideum GN=gcdh PE=3 SV=1	4.22426	8.95879	9.92983	9.00232
PputA514_0895	-	8.09469	0	0	9.00087
PputA514_0495	Cytosine deaminase OS=Escherichia coli (strain K12) GN=codA PE=1 SV=3	3.1193	0	8.48218	8.99747
PputA514_5830	Arginine--tRNA ligase OS=Pseudomonas fluorescens (strain SBW25) GN=argS PE=3 SV=1	10.0607	10.4409	9.80924	8.99629
PputA514_4819	GTP cyclohydrolase-2 OS=Pseudomonas fluorescens (strain SBW25) GN=ribA PE=3 SV=1	9.08765	8.37551	8.51004	8.99383
PputA514_4410	GTPase Obg OS=Pseudomonas fluorescens (strain Pf0-1) GN=obg PE=1 SV=1	10.5334	10.5357	3.88861	8.99306
PputA514_4772	UDP-N-acetylmuramate:L-alanyl-gamma-D-glutamyl-meso-diaminopimelate ligase OS=Escherichia coli (strain K12) GN=mpl PE=1 SV=3	8.61028	9.37781	9.82961	8.98668
PputA514_0123	Rubredoxin-NAD(+) reductase OS=Pseudomonas aeruginosa (strain ATCC 15692 / PAO1 / 1C / PRS 101 / LMG 12228) GN=alkT PE=1 SV=1	8.9822	9.90031	7.9916	8.98656
PputA514_4451	Putative lipoprotein YfiB OS=Escherichia coli (strain K12) GN=yfiB PE=3 SV=2	0	0	5.26381	8.98552
PputA514_3245	-	8.62504	4.1121	9.4159	8.98465
PputA514_1874	Putative ABC transporter-binding protein HI_1085 OS=Haemophilus influenzae (strain ATCC 51907 / DSM 11121 / KW20 / Rd) GN=HI_1085 PE=3 SV=1	10.2337	10.7323	10.1431	8.98213
PputA514_4740	Magnesium and cobalt efflux protein CorC OS=Vibrio cholerae serotype O1 (strain ATCC 39315 / El Tor Inaba N16961) GN=corC PE=3 SV=1	10.2948	4.17299	10.0048	8.98072
PputA514_5548	Universal stress protein E OS=Salmonella typhi GN=uspE PE=3 SV=3	9.84643	4.66876	9.20006	8.97633
PputA514_4607	3-methyl-2-oxobutanoate hydroxymethyltransferase OS=Pseudomonas fluorescens (strain SBW25) GN=panB PE=3 SV=1	9.85456	9.5979	4.04206	8.96824
PputA514_5986	Biosynthetic arginine decarboxylase OS=Pseudomonas syringae pv. tomato (strain DC3000) GN=speA PE=3 SV=1	6.36028	7.01654	9.58578	8.96636
PputA514_2507	-	3.28887	3.45764	8.27161	8.95922
PputA514_6416	Glutathione peroxidase OS=Pseudomonas wisconsinensis GN=gpwA PE=3 SV=1	8.55183	9.5472	9.02765	8.95798
PputA514_4307	Hydrolase YafV OS=Escherichia coli (strain K12) GN=yafV PE=3 SV=1	3.95692	8.30854	9.42433	8.9563
PputA514_5989	-	10.4916	9.8451	9.79036	8.95552
PputA514_4128	Glycine dehydrogenase (decarboxylating) OS=Pseudomonas fluorescens (strain SBW25) GN=gcvP PE=3 SV=1	8.54061	7.78047	8.73473	8.9553
PputA514_1762	Uncharacterized protein YlaK OS=Bacillus subtilis (strain 168) GN=ylaK PE=3 SV=1	7.65186	9.3304	8.93475	8.94401
PputA514_5526	Filamentous hemagglutinin OS=Bordetella pertussis (strain Tohama I / ATCC BAA-589 / NCTC 13251) GN=fhaB PE=1 SV=4	0	0	0	8.9409
PputA514_6096	Acetyl-coenzyme A carboxylase carboxyl transferase subunit beta OS=Pseudomonas fluorescens (strain Pf-5 / ATCC BAA-477) GN=accD PE=3 SV=1	8.99149	9.56976	9.20587	8.9381
PputA514_0024	Bifunctional protein GlmU OS=Pseudomonas fluorescens (strain SBW25) GN=glmU PE=3 SV=1	4.14967	5.02594	8.89337	8.9349
PputA514_2143	Glutamyl-tRNA(Gln) amidotransferase subunit A, mitochondrial OS=Mus musculus GN=Qrsl1 PE=2 SV=1	8.60677	9.81118	6.65064	8.93487
PputA514_5609	Glucose-6-phosphate 1-dehydrogenase OS=Synechococcus elongatus (strain PCC 7942) GN=zwf PE=3 SV=2	7.20527	3.65221	8.45329	8.93339
PputA514_5341	Rhizopine catabolism protein MocC OS=Rhizobium meliloti GN=mocC PE=3 SV=1	0	3.82323	8.06392	8.93312
PputA514_4269	Phosphoribosylglycinamide formyltransferase 2 OS=Pseudomonas fluorescens (strain SBW25) GN=purT PE=3 SV=1	9.17095	9.70877	9.00204	8.93236
PputA514_1676	Lon protease 2 OS=Thiomicrospira crunogena (strain XCL-2) GN=lon2 PE=3 SV=2	8.07369	8.55955	9.6142	8.93174
PputA514_0216	Diaminopimelate decarboxylase OS=Pseudomonas fluorescens GN=lysA PE=3 SV=1	9.55881	9.99142	9.30103	8.92373
PputA514_6353	Flagellum site-determining protein YlxH OS=Bacillus subtilis (strain 168) GN=ylxH PE=1 SV=1	4.35006	8.46329	9.0218	8.92063
PputA514_1587	Uncharacterized ATP-binding protein in capB 3'region OS=Pseudomonas fragi PE=3 SV=1	4.12617	9.07664	8.28494	8.9194
PputA514_4860	Uncharacterized isochorismatase family protein YddQ OS=Bacillus subtilis (strain 168) GN=yddQ PE=3 SV=1	3.99542	0	4.40745	8.91887
PputA514_3199	-	0	0	8.43464	8.91841
PputA514_6259	Putative ankyrin repeat protein PA3287 OS=Pseudomonas aeruginosa (strain ATCC 15692 / PAO1 / 1C / PRS 101 / LMG 12228) GN=PA3287 PE=4 SV=1	10.3493	0	9.48608	8.91641
PputA514_5516	Putative quercetin 2,3-dioxygenase PA2418 OS=Pseudomonas aeruginosa (strain ATCC 15692 / PAO1 / 1C / PRS 101 / LMG 12228) GN=PA2418 PE=3 SV=1	0	3.85264	3.98474	8.90706
PputA514_4608	Pantothenate synthetase OS=Pseudomonas fluorescens (strain SBW25) GN=panC PE=3 SV=2	3.40406	4.47649	7.89079	8.90609
PputA514_4640	DNA repair protein RecN OS=Vibrio cholerae serotype O1 (strain ATCC 39315 / El Tor Inaba N16961) GN=recN PE=3 SV=1	0	3.72014	0	8.9037
PputA514_4748	Membrane-bound lytic murein transglycosylase B OS=Escherichia coli (strain K12) GN=mltB PE=1 SV=1	9.27498	9.00008	9.69388	8.89985
PputA514_5772	O-acetylhomoserine (thiol)-lyase OS=Schizosaccharomyces pombe (strain 972 / ATCC 24843) GN=SPBC428.11 PE=2 SV=1	8.33512	8.9854	9.19219	8.8962
PputA514_3559	Filamentous hemagglutinin OS=Bordetella pertussis (strain Tohama I / ATCC BAA-589 / NCTC 13251) GN=fhaB PE=1 SV=4	0	0	2.61094	8.89488
PputA514_4409	Glutamate 5-kinase OS=Pseudomonas fluorescens (strain Pf0-1) GN=proB PE=3 SV=2	0	8.60079	8.25358	8.88804
PputA514_1981	Methyl-accepting chemotaxis protein PA2652 OS=Pseudomonas aeruginosa (strain ATCC 15692 / PAO1 / 1C / PRS 101 / LMG 12228) GN=PA2652 PE=4 SV=1	3.97334	0	3.91324	8.88261
PputA514_4179	Uncharacterized protein YjgR OS=Escherichia coli (strain K12) GN=yjgR PE=4 SV=1	9.03711	8.33956	9.6163	8.88185
PputA514_1449	Arginine/ornithine transport ATP-binding protein AotP OS=Pseudomonas aeruginosa (strain ATCC 15692 / PAO1 / 1C / PRS 101 / LMG 12228) GN=aotP PE=3 SV=2	4.2964	5.19453	8.17253	8.88078
PputA514_5734	-	9.54266	9.11566	9.5278	8.88006
PputA514_1425	Pyridoxine/pyridoxamine 5'-phosphate oxidase OS=Pseudomonas fluorescens (strain SBW25) GN=pdxH PE=3 SV=1	11.1039	9.64771	9.6133	8.87856
PputA514_2976	Arylesterase OS=Pseudomonas fluorescens PE=1 SV=4	8.4224	0	4.02596	8.87832
PputA514_4626	Phosphoglucosamine mutase OS=Pseudomonas fluorescens (strain SBW25) GN=glmM PE=3 SV=1	8.04603	9.06361	8.28811	8.86864
PputA514_5071	Glycine betaine/L-proline transport ATP-binding protein ProV OS=Escherichia coli (strain K12) GN=proV PE=1 SV=1	0	8.10126	8.51706	8.86594
PputA514_6435	-	9.68028	4.4673	9.03191	8.86594
PputA514_2339	Probable acetyl-CoA acetyltransferase OS=Dictyostelium discoideum GN=DDB_G0271544 PE=2 SV=1	3.68237	3.96244	8.97212	8.86344
PputA514_4669	Uncharacterized GTP-binding protein YjiA OS=Escherichia coli (strain K12) GN=yjiA PE=1 SV=3	7.81182	10.0531	9.38114	8.86068
PputA514_4297	GMP synthase [glutamine-hydrolyzing] OS=Pseudomonas fluorescens (strain SBW25) GN=guaA PE=3 SV=1	8.86913	8.54004	9.28354	8.85863
PputA514_4604	Transcriptional regulatory protein ZraR OS=Salmonella typhi GN=zraR PE=3 SV=1	8.90273	9.52633	8.68931	8.85439
PputA514_4636	4-hydroxy-tetrahydrodipicolinate reductase OS=Pseudomonas fluorescens (strain SBW25) GN=dapB PE=3 SV=2	0	8.39259	9.17689	8.85314
PputA514_5965	-	0	0	9.40245	8.84765
PputA514_3681	Guanine deaminase OS=Escherichia coli (strain K12) GN=guaD PE=1 SV=1	8.2483	8.4896	9.36268	8.84693
PputA514_1718	hypothetical protein	10.2413	9.64212	11.8369	8.84537
PputA514_2512	Octopine-binding periplasmic protein OS=Rhizobium radiobacter GN=occT PE=2 SV=1	4.07528	4.24404	10.7733	8.84167
PputA514_5882	Glycogen phosphorylase OS=Shigella flexneri GN=glgP PE=3 SV=1	8.53149	8.81934	8.64738	8.84133
PputA514_4146	Uncharacterized protein in oprL 3'region OS=Pseudomonas putida PE=4 SV=1	10.9773	8.94737	8.89265	8.82295
PputA514_5538	Acyl-CoA dehydrogenase OS=Bacillus subtilis (strain 168) GN=mmgC PE=2 SV=3	0	0	7.35641	8.82192
PputA514_5074	NAD/NADP-dependent betaine aldehyde dehydrogenase OS=Pseudomonas fluorescens (strain SBW25) GN=betB PE=3 SV=1	7.96201	8.22954	9.1761	8.82163
PputA514_3924	-	9.07321	9.04101	9.54905	8.82163
PputA514_0461	Delta-aminolevulinic acid dehydratase OS=Shigella flexneri GN=hemB PE=3 SV=2	7.37904	9.26506	9.01582	8.81462
PputA514_0101	N5-carboxyaminoimidazole ribonucleotide synthase OS=Pseudomonas aeruginosa (strain ATCC 15692 / PAO1 / 1C / PRS 101 / LMG 12228) GN=purK PE=3 SV=2	7.19526	8.05912	9.04388	8.81084
PputA514_0358	Thymidylate synthase OS=Pseudomonas fluorescens (strain SBW25) GN=thyA PE=3 SV=1	10.5441	10.3209	9.16075	8.80547
PputA514_3450	33 kDa chaperonin OS=Pseudomonas fluorescens (strain SBW25) GN=hslO PE=3 SV=1	11.5559	11.5407	9.35641	8.79471
PputA514_2716	Quinone oxidoreductase OS=Lama guanicoe GN=CRYZ PE=2 SV=1	0	0	9.29732	8.78906
PputA514_3731	-	8.58765	4.07011	8.61327	8.7863
PputA514_6038	-	8.44332	8.81838	9.37261	8.78262
PputA514_5745	Lipid A export ATP-binding/permease protein MsbA OS=Pseudomonas fluorescens (strain Pf0-1) GN=msbA PE=3 SV=1	9.40832	9.38337	7.70892	8.78193
PputA514_4534	5'-nucleotidase OS=Pseudomonas aeruginosa (strain ATCC 15692 / PAO1 / 1C / PRS 101 / LMG 12228) GN=PA0065 PE=1 SV=1	8.41841	4.60397	4.54869	8.77802
PputA514_1515	hypothetical protein	0	0	0	8.77794
PputA514_3904	Chemotaxis protein CheV OS=Bacillus subtilis (strain 168) GN=cheV PE=1 SV=1	8.99101	8.97502	8.75933	8.77461
PputA514_4695	Hemolysin VllY OS=Vibrio vulnificus (strain CMCP6) GN=vllY PE=3 SV=2	6.7536	8.26379	9.88907	8.77413
PputA514_1293	tRNA-modifying protein YgfZ OS=Yersinia pseudotuberculosis serotype IB (strain PB1/+) GN=YPTS_3305 PE=3 SV=1	8.94956	8.76498	9.03791	8.77396
PputA514_4614	-	6.88187	7.14946	9.17966	8.77094
PputA514_2701	Glutathione-independent formaldehyde dehydrogenase OS=Pseudomonas aeruginosa (strain ATCC 15692 / PAO1 / 1C / PRS 101 / LMG 12228) GN=fdhA PE=3 SV=1	0	0	9.41131	8.76822
PputA514_0175	Coenzyme A biosynthesis bifunctional protein CoaBC OS=Vibrio parahaemolyticus serotype O3:K6 (strain RIMD 2210633) GN=coaBC PE=3 SV=1	8.3458	9.01514	4.82913	8.76817
PputA514_4335	Protein translocase subunit SecD OS=Pseudomonas aeruginosa (strain ATCC 15692 / PAO1 / 1C / PRS 101 / LMG 12228) GN=secD PE=3 SV=1	7.32315	8.59382	8.25237	8.76764
PputA514_5809	Uroporphyrinogen decarboxylase OS=Pseudomonas fluorescens (strain SBW25) GN=hemE PE=3 SV=1	10.4002	9.42423	8.8788	8.76626
PputA514_0196	Xanthine phosphoribosyltransferase OS=Pseudomonas fluorescens (strain SBW25) GN=xpt PE=3 SV=1	8.93999	9.59634	10.1731	8.76442
PputA514_6470	ATP-dependent RNA helicase RhlE OS=Escherichia coli (strain K12) GN=rhlE PE=1 SV=3	8.54473	8.99356	8.32443	8.75663
PputA514_5719	Phosphoserine phosphatase OS=Archaeoglobus fulgidus (strain ATCC 49558 / VC-16 / DSM 4304 / JCM 9628 / NBRC 100126) GN=AF_2138 PE=3 SV=1	0	8.29672	8.7772	8.75593
PputA514_1456	Lipoprotein NlpD/LppB homolog OS=Pseudomonas aeruginosa (strain ATCC 15692 / PAO1 / 1C / PRS 101 / LMG 12228) GN=PA3623 PE=3 SV=1	8.57673	9.42922	9.24297	8.75505
PputA514_1897	Ribonuclease G OS=Shigella flexneri GN=rng PE=3 SV=2	6.6843	7.42561	8.77458	8.75145
PputA514_0412	Aspartate carbamoyltransferase OS=Pseudomonas fluorescens (strain SBW25) GN=pyrB PE=3 SV=1	8.86517	8.07496	8.33305	8.74305
PputA514_1936	hypothetical protein	8.80239	3.70078	8.24303	8.738
PputA514_2206	Nitrate transport protein NrtA OS=Nostoc sp. (strain PCC 7120 / UTEX 2576) GN=nrtA PE=3 SV=3	7.84336	3.98597	8.58972	8.73776
PputA514_1843	Putative 2-hydroxyacid dehydrogenase HI_1556 OS=Haemophilus influenzae (strain ATCC 51907 / DSM 11121 / KW20 / Rd) GN=HI_1556 PE=1 SV=1	10.1704	10.2828	9.19603	8.73753
PputA514_2963	-	4.79566	4.51264	8.60039	8.72689
PputA514_5978	-	8.15975	4.78313	4.96497	8.72689
PputA514_4035	Glutamate-pyruvate aminotransferase AlaC OS=Escherichia coli (strain K12) GN=alaC PE=1 SV=1	9.67714	8.98533	9.23104	8.72336
PputA514_2016	Isoleucine--tRNA ligase OS=Pseudomonas fluorescens (strain SBW25) GN=ileS PE=3 SV=1	8.37466	9.79784	9.11575	8.72273
PputA514_4693	Shikimate dehydrogenase OS=Streptomyces avermitilis (strain ATCC 31267 / DSM 46492 / JCM 5070 / NCIMB 12804 / NRRL 8165 / MA-4680) GN=aroE PE=3 SV=1	3.69401	3.57029	8.43549	8.71971
PputA514_0681	3-hydroxybutyryl-CoA dehydratase OS=Clostridium acetobutylicum (strain ATCC 824 / DSM 792 / JCM 1419 / LMG 5710 / VKM B-1787) GN=crt PE=3 SV=1	0	3.89038	10.8872	8.71935
PputA514_2343	3-hydroxyisobutyryl-CoA hydrolase, mitochondrial OS=Danio rerio GN=hibch PE=2 SV=1	8.72799	9.41951	10.2094	8.7191
PputA514_4151	Protein TolR OS=Pseudomonas aeruginosa (strain ATCC 15692 / PAO1 / 1C / PRS 101 / LMG 12228) GN=tolR PE=3 SV=1	0	0	8.90384	8.70839
PputA514_0382	Long-chain-alcohol oxidase FAO2 OS=Lotus japonicus GN=FAO2 PE=2 SV=1	0	9.23214	10.4242	8.70569
PputA514_0784	Uncharacterized protein Rv3661/MT3761 OS=Mycobacterium tuberculosis GN=Rv3661 PE=3 SV=1	9.33327	10.8211	9.03118	8.70423
PputA514_0590	Transaldolase OS=Pseudomonas fluorescens (strain Pf-5 / ATCC BAA-477) GN=tal PE=3 SV=1	10.3183	10.3151	9.01238	8.70369
PputA514_6484	3-oxoacyl-[acyl-carrier-protein] synthase 3 OS=Granulibacter bethesdensis (strain ATCC BAA-1260 / CGDNIH1) GN=fabH PE=3 SV=1	9.2241	8.88044	8.79626	8.6949
PputA514_4682	Cytochrome bd ubiquinol oxidase subunit 1 OS=Bacillus subtilis (strain 168) GN=cydA PE=3 SV=1	8.43201	0	11.1619	8.69217
PputA514_3310	-	0	7.41114	7.14885	8.69041
PputA514_3590	-	7.19127	3.98017	8.08535	8.68462
PputA514_0162	lipoprotein	9.89537	10.1155	9.97356	8.67605
PputA514_3229	-	0	0	3.83646	8.67554
PputA514_6001	Bifunctional purine biosynthesis protein PurH OS=Pseudomonas fluorescens (strain SBW25) GN=purH PE=3 SV=1	8.03172	8.55653	8.39132	8.66759
PputA514_3204	HTH-type transcriptional activator NagR OS=Ralstonia sp. GN=nagR PE=4 SV=1	0	7.75578	8.76981	8.66657
PputA514_2086	D-alanine--D-alanine ligase A OS=Salmonella typhimurium (strain LT2 / SGSC1412 / ATCC 700720) GN=ddlA PE=1 SV=2	8.39085	8.95088	8.41646	8.66551
PputA514_1596	Ribonuclease T OS=Pseudomonas fluorescens (strain Pf-5 / ATCC BAA-477) GN=rnt PE=3 SV=1	5.07594	4.37788	8.91583	8.66487
PputA514_1631	Hydrogenase transcriptional regulatory protein hupR1 OS=Rhodobacter capsulatus GN=hupR1 PE=1 SV=1	8.61349	3.50617	8.48539	8.65841
PputA514_0118	Phosphate regulon transcriptional regulatory protein PhoB OS=Pseudomonas aeruginosa (strain ATCC 15692 / PAO1 / 1C / PRS 101 / LMG 12228) GN=phoB PE=3 SV=2	3.84928	7.92333	8.87754	8.65603
PputA514_5717	Thiosulfate sulfurtransferase OS=Azotobacter vinelandii GN=rhdA PE=1 SV=1	9.10899	9.96148	9.13459	8.65578
PputA514_5325	Glycine betaine-binding periplasmic protein OS=Escherichia coli (strain K12) GN=proX PE=1 SV=1	3.27591	0	9.16813	8.64986
PputA514_5668	High-affinity branched-chain amino acid transport ATP-binding protein BraF OS=Pseudomonas aeruginosa (strain ATCC 15692 / PAO1 / 1C / PRS 101 / LMG 12228) GN=braF PE=3 SV=1	0	4.6099	9.16559	8.64939
PputA514_4832	-	10.2768	0	8.44528	8.64776
PputA514_4285	Phosphoribosylformylglycinamidine synthase OS=Pseudomonas fluorescens (strain Pf0-1) GN=purL PE=3 SV=1	8.15447	9.73481	9.22663	8.6456
PputA514_5952	Serine/threonine-protein kinase rio1 OS=Schizosaccharomyces pombe (strain 972 / ATCC 24843) GN=rio1 PE=3 SV=2	8.17464	8.33101	8.81145	8.64546
PputA514_6315	Thiol:disulfide interchange protein DsbG OS=Pseudomonas aeruginosa (strain ATCC 15692 / PAO1 / 1C / PRS 101 / LMG 12228) GN=dsbG PE=3 SV=1	10.0766	3.65362	8.98969	8.64374
PputA514_4923	dTDP-4-amino-4,6-dideoxy-D-glucose transaminase OS=Shigella dysenteriae GN=vioA PE=1 SV=1	8.93704	8.73215	8.30891	8.64292
PputA514_4637	Chaperone protein DnaJ OS=Pseudomonas fluorescens (strain SBW25) GN=dnaJ PE=3 SV=1	3.85633	8.21563	9.71828	8.63758
PputA514_1815	UDP-N-acetylmuramoyl-tripeptide--D-alanyl-D-alanine ligase OS=Escherichia coli (strain K12) GN=murF PE=1 SV=2	3.70681	3.87557	8.89466	8.63414
PputA514_1934	Photosynthetic apparatus regulatory protein RegA OS=Rhodovulum sulfidophilum GN=regA PE=3 SV=1	11.8567	3.87557	8.20384	8.63412
PputA514_3395	-	3.94053	8.25824	8.7387	8.63381
PputA514_1689	Signal peptidase I OS=Pseudomonas fluorescens GN=lepB PE=3 SV=1	3.71334	4.52117	7.00641	8.63289
PputA514_3407	Nopaline permease ATP-binding protein P OS=Agrobacterium tumefaciens (strain C58 / ATCC 33970) GN=nocP PE=3 SV=1	9.49122	7.75688	9.28107	8.62111
PputA514_0344	Uncharacterized protein YcgM OS=Escherichia coli (strain K12) GN=ycgM PE=1 SV=1	10.5711	11.1218	9.93891	8.61195
PputA514_0389	Uncharacterized zinc protease-like protein y4wB OS=Rhizobium sp. (strain NGR234) GN=NGR_a01030 PE=3 SV=1	8.64062	7.68578	8.08125	8.60978
PputA514_3421	3-oxoacyl-[acyl-carrier-protein] reductase FabG OS=Thermotoga maritima (strain ATCC 43589 / MSB8 / DSM 3109 / JCM 10099) GN=fabG PE=3 SV=1	0	0	0	8.6016
PputA514_6229	L-lactate dehydrogenase [cytochrome] OS=Pseudomonas fluorescens (strain SBW25) GN=lldD PE=3 SV=2	0	0	8.63453	8.60005
PputA514_1977	Catabolite repressor/activator OS=Shigella flexneri GN=cra PE=3 SV=1	9.18893	8.74204	9.05358	8.59509
PputA514_0813	Uncharacterized ABC transporter ATP-binding protein YadG OS=Escherichia coli (strain K12) GN=yadG PE=3 SV=1	4.13081	7.64734	9.34429	8.59333
PputA514_2030	Epimerase family protein YfcH OS=Escherichia coli (strain K12) GN=yfcH PE=3 SV=1	3.65685	0	10.199	8.592
PputA514_3250	Lon protease OS=Vibrio parahaemolyticus serotype O3:K6 (strain RIMD 2210633) GN=lon PE=3 SV=2	9.82054	10.1737	9.14484	8.59161
PputA514_4822	N utilization substance protein B homolog OS=Pseudomonas fluorescens (strain SBW25) GN=nusB PE=3 SV=1	11.3455	5.15957	9.89944	8.59073
PputA514_6333	Chemotaxis protein CheV OS=Bacillus subtilis (strain 168) GN=cheV PE=1 SV=1	10.3718	11.0828	3.7978	8.58869
PputA514_4212	Glucokinase OS=Pseudomonas aeruginosa (strain ATCC 15692 / PAO1 / 1C / PRS 101 / LMG 12228) GN=glk PE=3 SV=1	7.67449	3.74215	7.58889	8.58383
PputA514_0161	NAD-dependent epimerase/dehydratase	9.24521	8.46431	9.48765	8.58262
PputA514_4245	-	9.67468	4.64139	9.03932	8.58084
PputA514_4337	Queuine tRNA-ribosyltransferase OS=Pseudomonas syringae pv. tomato (strain DC3000) GN=tgt PE=3 SV=1	9.25544	9.56584	8.85704	8.57986
PputA514_3323	D-arabitol-phosphate dehydrogenase OS=Enterococcus avium PE=1 SV=1	0	0	9.11659	8.57635
PputA514_6476	Uncharacterized HTH-type transcriptional regulator YeeY OS=Escherichia coli (strain K12) GN=yeeY PE=4 SV=2	7.84408	8.37784	9.20589	8.57216
PputA514_4594	Hemin-binding periplasmic protein HmuT OS=Yersinia pestis GN=hmuT PE=1 SV=2	11.0247	8.81862	8.63812	8.56843
PputA514_3689	Dihydroorotate dehydrogenase (quinone) OS=Pseudomonas fluorescens (strain SBW25) GN=pyrD PE=3 SV=1	9.92226	10.7213	8.99031	8.56702
PputA514_3851	Na(+)/H(+) antiporter NhaA OS=Brucella melitensis biotype 1 (strain 16M / ATCC 23456 / NCTC 10094) GN=nhaA PE=3 SV=2	8.99894	7.99433	8.05081	8.56608
PputA514_3732	Phosphoadenosine phosphosulfate reductase OS=Pseudomonas aeruginosa (strain ATCC 15692 / PAO1 / 1C / PRS 101 / LMG 12228) GN=cysH PE=1 SV=2	4.4147	9.47447	8.63828	8.56449
PputA514_3996	Histidine-binding protein OS=Campylobacter jejuni subsp. jejuni serotype O:2 (strain NCTC 11168) GN=hisJ PE=3 SV=1	4.80242	8.11611	8.82443	8.56211
PputA514_5932	Omega-amino acid--pyruvate aminotransferase OS=Pseudomonas putida PE=1 SV=1	6.29564	4.21208	8.81364	8.55887
PputA514_1665	Quinoprotein glucose dehydrogenase A OS=Acinetobacter calcoaceticus GN=gdhA PE=3 SV=1	0	0	7.61137	8.55657
PputA514_3600	Uncharacterized ABC transporter ATP-binding protein y4gM OS=Rhizobium sp. (strain NGR234) GN=NGR_a03510 PE=3 SV=1	0	0	8.01487	8.55638
PputA514_4438	Muconate cycloisomerase 1 OS=Pseudomonas putida GN=catB PE=1 SV=4	0	0	6.87212	8.55497
PputA514_2826	Non-homologous end joining protein Ku OS=Pseudomonas syringae pv. tomato (strain DC3000) GN=ku PE=3 SV=1	6.9213	0	7.73938	8.55307
PputA514_4028	Uncharacterized oxidoreductase SSP1627 OS=Staphylococcus saprophyticus subsp. saprophyticus (strain ATCC 15305 / DSM 20229) GN=SSP1627 PE=3 SV=1	7.1933	8.14209	8.58737	8.55288
PputA514_4918	-	3.68769	0	8.26187	8.54932
PputA514_5172	Alpha-1,4-glucan:maltose-1-phosphate maltosyltransferase OS=Pseudomonas aeruginosa (strain ATCC 15692 / PAO1 / 1C / PRS 101 / LMG 12228) GN=glgE PE=3 SV=1	0	0	9.57984	8.54795
PputA514_1500	Succinyl-diaminopimelate desuccinylase OS=Pseudomonas fluorescens (strain Pf-5 / ATCC BAA-477) GN=dapE PE=3 SV=1	8.90241	0	3.89029	8.54555
PputA514_4376	Cytochrome bo(3) ubiquinol oxidase subunit 2 OS=Pseudomonas putida GN=cyoA PE=3 SV=1	10.6435	9.94959	8.79522	8.54425
PputA514_3656	Transcriptional activator protein Anr OS=Pseudomonas fluorescens GN=anr PE=2 SV=1	9.61062	0	8.65447	8.53504
PputA514_5087	Protein ElaA OS=Shigella flexneri GN=elaA PE=3 SV=1	4.15447	4.03073	8.61048	8.52945
PputA514_6348	Chemotaxis protein CheA OS=Thermotoga maritima (strain ATCC 43589 / MSB8 / DSM 3109 / JCM 10099) GN=cheA PE=1 SV=2	3.31329	4.38583	3.96071	8.52892
PputA514_5678	NH(3)-dependent NAD(+) synthetase OS=Pseudomonas fluorescens (strain Pf0-1) GN=nadE PE=1 SV=1	10.1173	9.61866	8.39696	8.52346
PputA514_1508	Nodulation protein NolG OS=Rhizobium meliloti (strain 1021) GN=nolG PE=4 SV=2	0	3.19976	9.42949	8.5195
PputA514_2048	Glutamyl-tRNA reductase OS=Pseudomonas fluorescens (strain SBW25) GN=hemA PE=3 SV=1	8.15383	8.67863	8.41638	8.51342
PputA514_4081	sn-glycerol-3-phosphate import ATP-binding protein UgpC OS=Bordetella avium (strain 197N) GN=ugpC PE=3 SV=1	12.5908	0	7.88509	8.51159
PputA514_1036	Histidinol-phosphate aminotransferase 2 OS=Pseudomonas fluorescens (strain Pf0-1) GN=hisC2 PE=1 SV=1	8.91757	9.48139	7.77323	8.51093
PputA514_1419	Uncharacterized protein Cbei_0202 OS=Clostridium beijerinckii (strain ATCC 51743 / NCIMB 8052) GN=Cbei_0202 PE=4 SV=2	3.23445	8.35469	7.78168	8.5082
PputA514_1879	hypothetical protein	4.35242	3.86021	3.78478	8.50711
PputA514_3473	D-cysteine desulfhydrase OS=Serratia proteamaculans (strain 568) GN=dcyD PE=3 SV=1	4.24667	4.54862	8.87987	8.50636
PputA514_4932	Anhydro-N-acetylmuramic acid kinase OS=Pseudomonas fluorescens (strain Pf-5 / ATCC BAA-477) GN=anmK PE=3 SV=1	0	0	0	8.50636
PputA514_4703	Acyl-CoA thioesterase 2 OS=Escherichia coli (strain K12) GN=tesB PE=1 SV=2	3.88894	8.54104	8.16435	8.49839
PputA514_4322	Chaperone protein HscA homolog OS=Pseudomonas fluorescens (strain SBW25) GN=hscA PE=3 SV=1	3.70423	3.84521	4.11626	8.49746
PputA514_3720	3-methylitaconate isomerase OS=Eubacterium barkeri GN=mii PE=1 SV=1	3.82269	3.83046	8.19858	8.4974
PputA514_4309	GTPase Der OS=Pseudomonas fluorescens (strain Pf0-1) GN=der PE=3 SV=1	3.67335	7.14215	8.15612	8.49013
PputA514_0391	Signal recognition particle receptor FtsY OS=Escherichia coli (strain K12) GN=ftsY PE=1 SV=1	9.17686	9.00716	8.70444	8.48924
PputA514_5955	-	3.9066	0	10.1532	8.48719
PputA514_1491	LL-diaminopimelate aminotransferase OS=Desulfovibrio vulgaris subsp. vulgaris (strain DP4) GN=dapL PE=3 SV=1	9.21185	8.91476	8.21025	8.48651
PputA514_1180	type IV pilus assembly PilZ	8.00626	8.66259	9.72802	8.47706
PputA514_4701	-	3.29765	0	9.11514	8.4767
PputA514_1533	Peptide chain release factor 2 OS=Xanthomonas campestris pv. vesicatoria (strain 85-10) GN=prfB PE=3 SV=1	9.15556	9.69642	8.71043	8.4757
PputA514_5851	Methyl-accepting chemotaxis protein McpS OS=Pseudomonas putida (strain KT2440) GN=mcpS PE=1 SV=1	8.62498	9.54493	6.31435	8.47031
PputA514_4463	Succinyl-CoA:coenzyme A transferase OS=Clostridium kluyveri (strain ATCC 8527 / DSM 555 / NCIMB 10680) GN=cat1 PE=2 SV=1	3.2903	3.45907	8.44685	8.47009
PputA514_0155	Uncharacterized protein TP_0073 OS=Treponema pallidum (strain Nichols) GN=TP_0073 PE=4 SV=1	3.54431	0	8.4863	8.47007
PputA514_1850	phospholipid/glycerol acyltransferase	8.33193	8.66631	8.8765	8.46779
PputA514_0998	Methyl-accepting chemotaxis protein PA2652 OS=Pseudomonas aeruginosa (strain ATCC 15692 / PAO1 / 1C / PRS 101 / LMG 12228) GN=PA2652 PE=4 SV=1	11.0543	10.139	3.88184	8.45758
PputA514_4873	Protein translocase subunit SecY OS=Pseudomonas aeruginosa (strain ATCC 15692 / PAO1 / 1C / PRS 101 / LMG 12228) GN=secY PE=3 SV=1	10.6362	10.3653	9.10304	8.45734
PputA514_1813	UDP-N-acetylmuramoylalanine--D-glutamate ligase OS=Pseudomonas fluorescens (strain Pf-5 / ATCC BAA-477) GN=murD PE=3 SV=1	7.59132	8.74764	7.98536	8.4509
PputA514_4487	Alginate biosynthesis transcriptional regulatory protein AlgB OS=Pseudomonas syringae pv. tomato (strain DC3000) GN=algB PE=3 SV=1	7.7025	3.21372	8.76166	8.45089
PputA514_4955	Spermidine/putrescine import ATP-binding protein PotA OS=Trichodesmium erythraeum (strain IMS101) GN=potA PE=3 SV=1	7.07479	7.92729	8.6226	8.44927
PputA514_5140	Periplasmic dipeptide transport protein OS=Escherichia coli (strain K12) GN=dppA PE=1 SV=1	7.99025	8.23155	8.94367	8.44619
PputA514_5438	Enamine/imine deaminase OS=Pyrococcus furiosus (strain ATCC 43587 / DSM 3638 / JCM 8422 / Vc1) GN=yjgF PE=1 SV=1	4.40492	4.94215	9.90385	8.44537
PputA514_4436	Catechol 1,2-dioxygenase OS=Acinetobacter baylyi (strain ATCC 33305 / BD413 / ADP1) GN=catA PE=1 SV=1	0	0	0	8.43871
PputA514_0313	Gamma-glutamylputrescine synthetase PuuA OS=Escherichia coli (strain K12) GN=puuA PE=1 SV=2	3.35877	8.1385	9.926	8.43806
PputA514_0071	import inner membrane translocase subunit Tim44	11.5687	10.7876	9.57192	8.4366
PputA514_1862	Hypoxanthine-guanine-xanthine phosphoribosyltransferase OS=Tritrichomonas foetus GN=HPT PE=1 SV=1	4.2107	0	9.26136	8.43441
PputA514_1925	Long-chain specific acyl-CoA dehydrogenase, mitochondrial OS=Rattus norvegicus GN=Acadl PE=1 SV=1	0	0	7.27707	8.43299
PputA514_3965	Succinylglutamate desuccinylase OS=Pseudomonas fluorescens (strain SBW25) GN=astE PE=3 SV=1	3.577	0	9.15603	8.43228
PputA514_1299	Porin-like protein NicP OS=Pseudomonas putida (strain KT2440) GN=nicP PE=2 SV=1	3.10395	3.56521	8.8794	8.42847
PputA514_2325	-	10.2841	10.0945	9.15601	8.42536
PputA514_0520	D-inositol 3-phosphate glycosyltransferase OS=Streptomyces bingchenggensis (strain BCW-1) GN=mshA PE=3 SV=1	3.45417	0	8.01729	8.4214
PputA514_2203	alkylhydroperoxidase	4.28367	7.55517	9.50938	8.4194
PputA514_0785	Quinone oxidoreductase PIG3 OS=Homo sapiens GN=TP53I3 PE=1 SV=2	7.94523	9.47899	8.30983	8.41601
PputA514_5052	Putative dipeptidase CPC735_014430 OS=Coccidioides posadasii (strain C735) GN=CPC735_014430 PE=3 SV=1	0	0	7.49503	8.41397
PputA514_3638	Methyl-accepting chemotaxis protein CtpH OS=Pseudomonas aeruginosa (strain ATCC 15692 / PAO1 / 1C / PRS 101 / LMG 12228) GN=ctpH PE=1 SV=1	9.11623	10.2191	3.78478	8.41118
PputA514_1585	DNA mismatch repair protein MutS OS=Pseudomonas fluorescens (strain SBW25) GN=mutS PE=3 SV=1	7.93792	7.57394	8.295	8.40872
PputA514_5744	Bifunctional protein HldE OS=Pseudomonas fluorescens (strain SBW25) GN=hldE PE=3 SV=1	9.06357	9.74282	8.35442	8.40748
PputA514_1664	Quinoprotein glucose dehydrogenase A OS=Acinetobacter calcoaceticus GN=gdhA PE=3 SV=1	6.80422	0	8.5811	8.40655
PputA514_0008	tRNA modification GTPase MnmE OS=Pseudomonas fluorescens (strain Pf0-1) GN=mnmE PE=3 SV=1	3.55994	7.72212	7.55015	8.40504
PputA514_3268	D-hydantoinase/dihydropyrimidinase OS=Pseudomonas aeruginosa (strain ATCC 15692 / PAO1 / 1C / PRS 101 / LMG 12228) GN=dht PE=3 SV=1	0	8.31207	8.63585	8.40282
PputA514_0677	Probable 2-ketoarginine decarboxylase AruI OS=Pseudomonas aeruginosa (strain ATCC 15692 / PAO1 / 1C / PRS 101 / LMG 12228) GN=aruI PE=1 SV=1	3.75903	3.58566	9.89986	8.40237
PputA514_1198	DNA topoisomerase 1 OS=Pseudomonas aeruginosa (strain ATCC 15692 / PAO1 / 1C / PRS 101 / LMG 12228) GN=topA PE=3 SV=1	6.12876	8.26613	8.42657	8.40064
PputA514_3210	3-hydroxypropionyl-coenzyme A dehydratase OS=Metallosphaera sedula (strain ATCC 51363 / DSM 5348) GN=Msed_2001 PE=1 SV=1	3.44334	0	9.52711	8.3997
PputA514_5211	-	4.05157	0	3.55989	8.39965
PputA514_4707	ATP-dependent RNA helicase RhlE OS=Escherichia coli (strain K12) GN=rhlE PE=1 SV=3	7.10101	7.62584	7.44533	8.39783
PputA514_6088	Gamma-glutamylputrescine oxidoreductase OS=Escherichia coli (strain K12) GN=puuB PE=1 SV=2	0	4.24833	8.55465	8.38865
PputA514_2091	Uncharacterized protein YddH OS=Escherichia coli (strain K12) GN=yddH PE=3 SV=2	0	4.12113	9.7213	8.38835
PputA514_5326	-	0	0	3.927	8.38789
PputA514_3561	Filamentous hemagglutinin OS=Bordetella pertussis (strain Tohama I / ATCC BAA-589 / NCTC 13251) GN=fhaB PE=1 SV=4	0	2.58696	0	8.38785
PputA514_5899	Carboxy-terminal-processing protease OS=Bartonella bacilliformis (strain ATCC 35685 / KC583) GN=ctpA PE=3 SV=1	8.23506	8.28021	8.86816	8.38714
PputA514_6149	Glutathione S-transferase 3 OS=Schizosaccharomyces pombe (strain 972 / ATCC 24843) GN=gst3 PE=1 SV=3	8.9907	3.76713	9.93134	8.37656
PputA514_4383	Uncharacterized protein PA3922 OS=Pseudomonas aeruginosa (strain ATCC 15692 / PAO1 / 1C / PRS 101 / LMG 12228) GN=PA3922 PE=1 SV=1	0	0	7.31159	8.3753
PputA514_1455	RNA polymerase sigma factor RpoS OS=Pseudomonas aeruginosa (strain ATCC 15692 / PAO1 / 1C / PRS 101 / LMG 12228) GN=rpoS PE=3 SV=1	10.4308	9.24485	9.65065	8.37245
PputA514_0962	Phospho-2-dehydro-3-deoxyheptonate aldolase 1, chloroplastic OS=Arabidopsis thaliana GN=DHS1 PE=2 SV=2	3.2261	3.87467	8.49138	8.36593
PputA514_0878	hypothetical protein	9.57434	9.14366	9.43487	8.36519
PputA514_3936	UPF0174 protein jhp_1494 OS=Helicobacter pylori (strain J99 / ATCC 700824) GN=jhp_1494 PE=3 SV=1	8.96341	9.36094	8.73273	8.36424
PputA514_3020	Methylmalonate semialdehyde dehydrogenase [acylating] 1 OS=Geobacillus kaustophilus (strain HTA426) GN=iolA1 PE=3 SV=1	0	0	8.10857	8.36081
PputA514_0983	Probable L,D-transpeptidase YbiS OS=Escherichia coli (strain K12) GN=ybiS PE=1 SV=1	9.5519	9.28425	8.63729	8.36009
PputA514_1457	Protein-L-isoaspartate O-methyltransferase OS=Pseudomonas fluorescens (strain SBW25) GN=pcm PE=3 SV=1	8.48854	8.74122	8.61048	8.35953
PputA514_4183	Formyltetrahydrofolate deformylase OS=Synechocystis sp. (strain PCC 6803 / Kazusa) GN=purU PE=3 SV=1	7.92008	10.1341	8.72193	8.35568
PputA514_4387	Putative aldolase class 2 protein PA3430 OS=Pseudomonas aeruginosa (strain ATCC 15692 / PAO1 / 1C / PRS 101 / LMG 12228) GN=PA3430 PE=3 SV=1	0	0	8.80954	8.35107
PputA514_4684	Putative xanthine dehydrogenase YagR molybdenum-binding subunit OS=Escherichia coli (strain K12) GN=yagR PE=3 SV=1	7.02825	2.85174	8.95177	8.35084
PputA514_2253	trehalose synthase	0	0	8.15539	8.34463
PputA514_6100	-	9.27727	7.22162	7.34495	8.33989
PputA514_5431	D-beta-hydroxybutyrate dehydrogenase OS=Cupriavidus necator (strain ATCC 17699 / H16 / DSM 428 / Stanier 337) GN=hbdH1 PE=3 SV=2	10.1469	8.84185	8.71112	8.32864
PputA514_4167	-	4.56757	4.70856	9.49223	8.32623
PputA514_1986	Nicotinate-nucleotide pyrophosphorylase [carboxylating] OS=Pseudomonas aeruginosa (strain ATCC 15692 / PAO1 / 1C / PRS 101 / LMG 12228) GN=nadC PE=3 SV=2	9.32375	9.01365	9.15319	8.32622
PputA514_4566	Trk system potassium uptake protein TrkA OS=Vibrio alginolyticus GN=trkA PE=3 SV=1	3.71931	0	9.11041	8.32589
PputA514_2708	-	0	0	7.69712	8.32364
PputA514_4489	N-acetylmuramoyl-L-alanine amidase AmiD OS=Escherichia coli (strain K12) GN=amiD PE=1 SV=1	0	4.43202	8.73174	8.32303
PputA514_4781	Uncharacterized N-acetyltransferase YhfO OS=Bacillus subtilis (strain 168) GN=yhfO PE=3 SV=1	9.70825	9.74261	10.3194	8.32192
PputA514_2187	Glycogen debranching enzyme OS=Escherichia coli O81 (strain ED1a) GN=glgX PE=3 SV=1	3.79469	0	8.76836	8.30991
PputA514_3641	-	13.4948	11.6333	4.74059	8.30756
PputA514_2997	-	7.69331	8.09234	8.63394	8.30698
PputA514_2733	Putative thiamine pyrophosphate-containing protein YdaP OS=Bacillus subtilis (strain 168) GN=ydaP PE=2 SV=1	3.5134	0	9.61901	8.30279
PputA514_6290	Probable allantoicase OS=Pseudomonas fluorescens (strain SBW25) GN=alc PE=3 SV=1	8.61294	9.403	8.71454	8.30261
PputA514_6265	Acireductone dioxygenase OS=Pseudomonas fluorescens (strain Pf0-1) GN=mtnD PE=3 SV=2	4.24667	9.625	8.17233	8.29885
PputA514_1951	Dipeptide transport ATP-binding protein DppF OS=Escherichia coli (strain K12) GN=dppF PE=3 SV=1	7.27079	8.01208	9.70007	8.29134
PputA514_0023	Bifunctional protein GlmU OS=Pseudomonas fluorescens (strain SBW25) GN=glmU PE=3 SV=1	0	3.59516	3.75501	8.28986
PputA514_3215	Uncharacterized protein ZMO1242 OS=Zymomonas mobilis subsp. mobilis (strain ATCC 31821 / ZM4 / CP4) GN=ZMO1242 PE=4 SV=2	3.83918	8.63475	7.91904	8.28827
PputA514_0011	Uncharacterized protein in gidB 3'region OS=Pseudomonas putida PE=4 SV=1	4.11243	9.29763	3.91324	8.2844
PputA514_3439	Protein YdeP OS=Escherichia coli O157:H7 GN=ydeP PE=3 SV=3	0	10.3816	9.67286	8.27371
PputA514_0132	Putative type VI secretion system protein VgrGA OS=Dickeya dadantii (strain 3937) GN=vgrGA PE=4 SV=1	0	0	7.90758	8.27311
PputA514_4755	Membrane-bound lytic murein transglycosylase B OS=Escherichia coli (strain K12) GN=mltB PE=1 SV=1	3.77595	0	7.23087	8.27241
PputA514_5537	Uncharacterized protein YxeQ OS=Bacillus subtilis (strain 168) GN=yxeQ PE=3 SV=2	0	0	7.98217	8.26639
PputA514_0783	Spermidine/putrescine import ATP-binding protein PotA OS=Haemophilus influenzae (strain 86-028NP) GN=potA PE=3 SV=2	3.29541	7.56154	7.63833	8.2648
PputA514_6274	GTP cyclohydrolase 1 2 OS=Pseudomonas syringae pv. tomato (strain DC3000) GN=folE2 PE=3 SV=1	10.96	10.1663	9.24312	8.25841
PputA514_4965	Ribosomal RNA small subunit methyltransferase A OS=Pseudomonas fluorescens (strain Pf-5 / ATCC BAA-477) GN=rsmA PE=3 SV=1	10.0265	9.1857	9.34744	8.25744
PputA514_3433	3'(2'),5'-bisphosphate nucleotidase CysQ OS=Salmonella typhi GN=cysQ PE=3 SV=1	0	0	6.96858	8.25606
PputA514_1914	5-dehydro-4-deoxyglucarate dehydratase OS=Pseudomonas putida (strain KT2440) GN=PP_3599 PE=3 SV=1	4.43976	8.34125	8.84204	8.25205
PputA514_6252	Putative aminopeptidase YhfE OS=Bacillus subtilis (strain 168) GN=yhfE PE=3 SV=1	7.48412	3.30632	7.12093	8.24741
PputA514_1788	Uncharacterized HTH-type transcriptional regulator HI_1364 OS=Haemophilus influenzae (strain ATCC 51907 / DSM 11121 / KW20 / Rd) GN=HI_1364 PE=4 SV=1	6.77526	8.30904	7.66933	8.24604
PputA514_0304	Peroxiredoxin-like protein DDB_G0282517, mitochondrial OS=Dictyostelium discoideum GN=DDB_G0282517 PE=3 SV=1	9.46322	0	4.20573	8.23784
PputA514_5343	Uncharacterized HTH-type transcriptional regulator HI_0143 OS=Haemophilus influenzae (strain ATCC 51907 / DSM 11121 / KW20 / Rd) GN=HI_0143 PE=4 SV=2	3.84768	0	8.82783	8.23784
PputA514_0074	HTH-type transcriptional regulator HexR OS=Escherichia coli (strain K12) GN=hexR PE=3 SV=2	0	0	7.74127	8.23624
PputA514_2540	Extracellular serine protease OS=Serratia marcescens PE=1 SV=1	10.6635	0	7.63965	8.23593
PputA514_5959	-	0	0	8.03185	8.23434
PputA514_0669	Response regulator GacA OS=Pseudomonas fluorescens GN=gacA PE=3 SV=1	3.96891	8.56627	3.76213	8.23433
PputA514_4181	Methyl-accepting chemotaxis protein PctA OS=Pseudomonas aeruginosa (strain ATCC 15692 / PAO1 / 1C / PRS 101 / LMG 12228) GN=pctA PE=1 SV=1	7.69763	9.2172	6.04017	8.22433
PputA514_0010	Ribosomal RNA small subunit methyltransferase G OS=Pseudomonas fluorescens (strain Pf-5 / ATCC BAA-477) GN=rsmG PE=3 SV=2	7.86468	8.18201	8.25879	8.22431
PputA514_4400	GTP cyclohydrolase 1 1 OS=Pseudomonas syringae pv. tomato (strain DC3000) GN=folE1 PE=3 SV=1	9.13166	8.51582	8.30012	8.2191
PputA514_1107	3-oxo-Delta(4,5)-steroid 5-beta-reductase OS=Digitalis lanata PE=1 SV=1	8.01894	0	4.1956	8.21757
PputA514_2833	Uncharacterized ABC transporter ATP-binding protein YbiT OS=Escherichia coli (strain K12) GN=ybiT PE=3 SV=1	6.98751	7.90111	8.07084	8.21556
PputA514_3288	Probable metallo-hydrolase BURPS1710b_2304 OS=Burkholderia pseudomallei (strain 1710b) GN=BURPS1710b_2304 PE=1 SV=1	0	0	3.7721	8.20457
PputA514_1894	Protein TldD OS=Shigella flexneri GN=tldD PE=3 SV=1	8.3036	9.22486	8.77298	8.19843
PputA514_0290	Aminomethyltransferase OS=Pseudomonas syringae pv. tomato (strain DC3000) GN=gcvT PE=3 SV=1	3.34065	8.31298	7.76398	8.19431
PputA514_0533	-	9.33006	0	10.4859	8.18964
PputA514_2199	Methyl-accepting chemotaxis protein PA2652 OS=Pseudomonas aeruginosa (strain ATCC 15692 / PAO1 / 1C / PRS 101 / LMG 12228) GN=PA2652 PE=4 SV=1	8.02362	9.43911	6.86794	8.18894
PputA514_5873	Uncharacterized 21.2 kDa protein in hutC 3'region OS=Pseudomonas putida PE=4 SV=1	0	0	3.49229	8.1884
PputA514_3346	Probable voltage-gated potassium channel subunit beta OS=Arabidopsis thaliana GN=KAB1 PE=1 SV=1	9.89547	0	8.29079	8.18622
PputA514_2140	-	0	3.97468	8.5539	8.18038
PputA514_1477	UDP-3-O-acylglucosamine N-acyltransferase OS=Pseudomonas fluorescens (strain SBW25) GN=lpxD PE=3 SV=1	3.74873	6.80715	4.04954	8.1714
PputA514_2049	TPR repeat-containing protein PA4667 OS=Pseudomonas aeruginosa (strain ATCC 15692 / PAO1 / 1C / PRS 101 / LMG 12228) GN=PA4667 PE=4 SV=2	9.43844	9.3515	9.19247	8.16937
PputA514_1940	Periplasmic dipeptide transport protein OS=Escherichia coli (strain K12) GN=dppA PE=1 SV=1	4.14372	4.60496	9.48131	8.16891
PputA514_1819	Ribosomal RNA small subunit methyltransferase H OS=Pseudomonas fluorescens (strain SBW25) GN=rsmH PE=3 SV=1	7.09942	7.25582	4.28858	8.16655
PputA514_4801	Uncharacterized protein YjfK OS=Escherichia coli (strain K12) GN=yjfK PE=4 SV=1	0	0	8.7281	8.15843
PputA514_5720	-	9.49416	9.3802	9.03251	8.15758
PputA514_3575	-	3.64873	0	8.75271	8.14945
PputA514_2047	Peptide chain release factor 1 OS=Pseudomonas fluorescens (strain SBW25) GN=prfA PE=3 SV=1	3.23045	0	7.63991	8.13489
PputA514_4606	2-amino-4-hydroxy-6-hydroxymethyldihydropteridine pyrophosphokinase OS=Pseudomonas aeruginosa (strain ATCC 15692 / PAO1 / 1C / PRS 101 / LMG 12228) GN=folK PE=3 SV=1	4.10341	0	3.89662	8.13485
PputA514_6366	Flagellar motor switch protein FliM OS=Pseudomonas aeruginosa (strain ATCC 15692 / PAO1 / 1C / PRS 101 / LMG 12228) GN=fliM PE=3 SV=2	7.86023	8.33527	3.90422	8.13484
PputA514_5019	Uncharacterized GST-like protein YibF OS=Escherichia coli (strain K12) GN=yibF PE=1 SV=1	9.65271	9.21612	9.56712	8.12693
PputA514_2191	4-alpha-glucanotransferase OS=Escherichia coli (strain K12) GN=malQ PE=3 SV=2	8.5176	0	8.56597	8.12518
PputA514_5114	5,10-methylenetetrahydrofolate reductase OS=Aquifex aeolicus (strain VF5) GN=metF PE=3 SV=1	8.79368	4.21112	8.34758	8.12384
PputA514_5228	Glyoxylate/hydroxypyruvate reductase B OS=Escherichia fergusonii (strain ATCC 35469 / DSM 13698 / CDC 0568-73) GN=ghrB PE=3 SV=1	8.21532	4.26548	3.10502	8.12147
PputA514_3265	Hydantoin utilization protein C OS=Pseudomonas sp. (strain NS671) GN=hyuC PE=1 SV=1	3.40663	3.84009	8.44566	8.11873
PputA514_5458	Probable protease SohB OS=Shigella flexneri GN=sohB PE=3 SV=1	8.96502	7.70236	9.3229	8.11317
PputA514_5966	Putative conjugal transfer protein Rv3659c/MT3759 OS=Mycobacterium tuberculosis GN=Rv3659c PE=2 SV=1	0	0	7.94013	8.11316
PputA514_4370	7-cyano-7-deazaguanine synthase 2 OS=Pseudomonas fluorescens (strain Pf-5 / ATCC BAA-477) GN=queC2 PE=3 SV=1	8.20162	4.77334	3.84824	8.10781
PputA514_3513	Sulfate/thiosulfate import ATP-binding protein CysA OS=Pseudomonas syringae pv. tomato (strain DC3000) GN=cysA PE=3 SV=1	0	7.03115	7.06146	8.10296
PputA514_4568	Protein Ddg OS=Shigella flexneri GN=lpxP PE=3 SV=1	0	7.68987	9.11686	8.10066
PputA514_0167	UPF0701 protein HI_0467 OS=Haemophilus influenzae (strain ATCC 51907 / DSM 11121 / KW20 / Rd) GN=HI_0467 PE=1 SV=1	10.1565	8.79376	8.98173	8.09335
PputA514_0140	ImpA family type VI secretion-associated protein	8.68968	3.44254	8.4228	8.09009
PputA514_0634	Ketimine reductase mu-crystallin OS=Macropus fuliginosus GN=CRYM PE=2 SV=1	3.32682	0	8.49354	8.07022
PputA514_0249	Delta-aminolevulinic acid dehydratase OS=Pseudomonas aeruginosa (strain ATCC 15692 / PAO1 / 1C / PRS 101 / LMG 12228) GN=hemB PE=1 SV=1	9.00205	8.43055	8.85914	8.06918
PputA514_1384	4-hydroxybenzoate transporter PcaK OS=Pseudomonas putida GN=pcaK PE=1 SV=1	0	9.77629	4.3226	8.06854
PputA514_3687	Ribosomal RNA large subunit methyltransferase K/L OS=Pseudomonas fluorescens (strain Pf0-1) GN=rlmL PE=3 SV=1	6.63274	7.76871	8.4396	8.06833
PputA514_2175	Cystathionine beta-synthase OS=Homo sapiens GN=CBS PE=1 SV=2	0	0	8.0223	8.06381
PputA514_4125	Carbamate kinase OS=Pseudomonas aeruginosa (strain ATCC 15692 / PAO1 / 1C / PRS 101 / LMG 12228) GN=arcC PE=3 SV=1	11.2496	8.81297	3.43395	8.06281
PputA514_4779	Ethanolamine ammonia-lyase heavy chain OS=Escherichia coli (strain K12) GN=eutB PE=1 SV=1	3.33988	7.85796	8.75476	8.06126
PputA514_5077	-	3.74239	7.78019	7.51792	8.05948
PputA514_0747	2-hydroxychromene-2-carboxylate isomerase OS=Sphingobium xenophagum GN=nsaD PE=1 SV=1	8.65243	4.31002	8.01708	8.05859
PputA514_0319	Putrescine transport ATP-binding protein PotG OS=Escherichia coli (strain K12) GN=potG PE=3 SV=2	3.48393	8.14609	9.17311	8.05687
PputA514_0372	Dihydrofolate reductase type 3 OS=Salmonella typhimurium GN=dhfrIII PE=1 SV=1	4.27169	9.30656	8.2224	8.0564
PputA514_0482	Methyl-accepting chemotaxis protein PA2652 OS=Pseudomonas aeruginosa (strain ATCC 15692 / PAO1 / 1C / PRS 101 / LMG 12228) GN=PA2652 PE=4 SV=1	7.93035	10.0638	3.65839	8.05522
PputA514_5872	Urocanate hydratase OS=Pseudomonas fluorescens (strain SBW25) GN=hutU PE=3 SV=1	0	7.72853	8.20898	8.05437
PputA514_3026	Uncharacterized deoxyribonuclease MJ0761 OS=Methanocaldococcus jannaschii (strain ATCC 43067 / DSM 2661 / JAL-1 / JCM 10045 / NBRC 100440) GN=MJ0761 PE=3 SV=1	3.80945	0	0	8.04692
PputA514_1505	Titin OS=Homo sapiens GN=TTN PE=1 SV=4	10.8363	9.03713	7.71022	8.04425
PputA514_0374	hypothetical protein	3.62387	7.63347	9.7952	8.04425
PputA514_3835	HTH-type transcriptional regulator AcrR OS=Shigella flexneri GN=acrR PE=3 SV=1	3.57918	0	7.83738	8.03982
PputA514_0839	hypothetical protein	3.43265	3.6014	4.1793	8.03927
PputA514_1839	Long-chain-fatty-acid--CoA ligase OS=Thermus thermophilus (strain HB8 / ATCC 27634 / DSM 579) GN=TTHA0604 PE=1 SV=1	8.46553	8.32938	8.92524	8.03263
PputA514_2615	Lignostilbene-alpha,beta-dioxygenase isozyme III OS=Sphingomonas paucimobilis GN=lsdB PE=1 SV=1	0	0	8.80227	8.03234
PputA514_1063	-	8.54649	4.70601	3.70487	8.02862
PputA514_4564	Methionyl-tRNA formyltransferase OS=Pseudomonas fluorescens (strain Pf0-1) GN=fmt PE=3 SV=1	4.22589	4.36688	8.92164	8.02593
PputA514_1729	Maleylacetoacetate isomerase OS=Pseudomonas aeruginosa (strain ATCC 15692 / PAO1 / 1C / PRS 101 / LMG 12228) GN=maiA PE=3 SV=1	0	0	8.79399	8.01679
PputA514_5729	Esterase YqiA OS=Shigella flexneri GN=yqiA PE=3 SV=1	10.1569	8.68926	9.16972	8.01509
PputA514_4936	Probable nitronate monooxygenase OS=Staphylococcus haemolyticus (strain JCSC1435) GN=SH2032 PE=3 SV=1	9.86165	7.73305	8.60232	8.01233
PputA514_1883	RNA polymerase sigma-54 factor OS=Pseudomonas putida GN=rpoN PE=3 SV=1	8.45643	8.80542	7.83563	8.00866
PputA514_2987	Disulfide-bond oxidoreductase YghU OS=Escherichia coli (strain K12) GN=yghU PE=1 SV=2	3.9362	9.55062	9.23859	8.00795
PputA514_0299	Uncharacterized protein YgiF OS=Escherichia coli (strain K12) GN=ygiF PE=4 SV=1	7.7299	7.83648	8.31693	8.00455
PputA514_5866	Histidine ammonia-lyase OS=Pseudomonas fluorescens (strain SBW25) GN=hutH PE=3 SV=2	7.51553	8.25681	8.82784	8.00088
PputA514_6337	Probable lipid kinase YegS-like OS=Pseudomonas fluorescens (strain Pf0-1) GN=Pfl01_3958 PE=3 SV=2	8.41342	0	8.03536	8.00088
PputA514_1780	NADPH-dependent 1-acyldihydroxyacetone phosphate reductase OS=Schizosaccharomyces pombe (strain 972 / ATCC 24843) GN=ayr1 PE=3 SV=2	3.5914	3.89922	3.7388	8.00016
PputA514_2334	KaiC-like protein 2 OS=Synechocystis sp. (strain PCC 6803 / Kazusa) GN=slr1942 PE=3 SV=1	8.09383	7.25015	8.73064	8
PputA514_0435	Malonyl-S-ACP:biotin-protein carboxyltransferase MADC OS=Malonomonas rubra GN=madC PE=1 SV=1	0	0	6.71	7.99746
PputA514_2817	Iron uptake system component EfeO OS=Yersinia pseudotuberculosis serotype I (strain IP32953) GN=efeO PE=3 SV=1	12.5116	10.1225	3.52596	7.98952
PputA514_3209	Methylcrotonoyl-CoA carboxylase beta chain, mitochondrial OS=Mus musculus GN=Mccc2 PE=1 SV=1	3.23714	3.40593	8.52183	7.98735
PputA514_0750	Cysteine desulfurase OS=Azotobacter vinelandii GN=iscS PE=1 SV=3	3.68018	0	7.44298	7.98451
PputA514_5416	Putative binding protein BRA0576/BS1330_II0571 OS=Brucella suis biovar 1 (strain 1330) GN=BRA0576 PE=3 SV=1	7.83742	6.66614	6.98561	7.98055
PputA514_5605	-	6.62062	0	7.25739	7.98018
PputA514_3007	Methyl-accepting chemotaxis protein PctB OS=Pseudomonas aeruginosa (strain ATCC 15692 / PAO1 / 1C / PRS 101 / LMG 12228) GN=pctB PE=1 SV=1	8.10758	9.10641	6.12203	7.9782
PputA514_5439	Octopine permease ATP-binding protein P OS=Rhizobium meliloti GN=occP PE=3 SV=1	3.48938	9.74352	9.63594	7.97752
PputA514_3637	Aerotaxis receptor OS=Escherichia coli (strain K12) GN=aer PE=1 SV=1	8.8472	9.22726	0	7.97707
PputA514_3100	50S ribosomal protein L16 arginine hydroxylase OS=Escherichia coli (strain K12) GN=ycfD PE=1 SV=2	8.52845	7.24752	8.15585	7.97706
PputA514_4225	-	10.4032	8.87828	9.5736	7.97035
PputA514_5171	Alpha-1,4-glucan:maltose-1-phosphate maltosyltransferase OS=Pseudomonas aeruginosa (strain ATCC 15692 / PAO1 / 1C / PRS 101 / LMG 12228) GN=glgE PE=3 SV=1	3.76888	0	9.32794	7.96576
PputA514_0450	Adenosylmethionine-8-amino-7-oxononanoate aminotransferase OS=Lysinibacillus sphaericus GN=bioA PE=1 SV=1	3.70219	7.55313	7.42236	7.96387
PputA514_1823	Penicillin-binding protein activator LpoA OS=Vibrio vulnificus (strain YJ016) GN=lpoA PE=3 SV=1	9.00792	3.74793	0	7.96386
PputA514_5931	Methylmalonate-semialdehyde dehydrogenase [acylating] OS=Pseudomonas aeruginosa (strain ATCC 15692 / PAO1 / 1C / PRS 101 / LMG 12228) GN=mmsA PE=1 SV=2	8.16026	8.91983	8.51558	7.96213
PputA514_0614	sn-glycerol-3-phosphate import ATP-binding protein UgpC OS=Burkholderia xenovorans (strain LB400) GN=ugpC PE=3 SV=1	0	0	6.83145	7.95798
PputA514_0287	Probable binding protein component of ABC iron transporter PA5217 OS=Pseudomonas aeruginosa (strain ATCC 15692 / PAO1 / 1C / PRS 101 / LMG 12228) GN=PA5217 PE=1 SV=1	8.71475	3.93832	9.06374	7.95583
PputA514_3969	Arginine N-succinyltransferase subunit beta OS=Pseudomonas aeruginosa (strain ATCC 15692 / PAO1 / 1C / PRS 101 / LMG 12228) GN=aruG PE=1 SV=2	0	6.84886	7.58664	7.95583
PputA514_4214	Phosphogluconate dehydratase OS=Pseudomonas aeruginosa (strain ATCC 15692 / PAO1 / 1C / PRS 101 / LMG 12228) GN=edd PE=3 SV=3	10.8166	8.60041	8.0749	7.95542
PputA514_2194	Glyoxylate reductase OS=Aeropyrum pernix (strain ATCC 700893 / DSM 11879 / JCM 9820 / NBRC 100138 / K1) GN=gyaR PE=3 SV=2	6.79786	7.95415	7.93465	7.94993
PputA514_1674	Glutamyl-tRNA(Gln) amidotransferase subunit A OS=Streptococcus uberis (strain ATCC BAA-854 / 0140J) GN=gatA PE=3 SV=1	0	0	8.42559	7.94677
PputA514_5906	Imidazole glycerol phosphate synthase subunit HisH OS=Pseudomonas fluorescens (strain Pf0-1) GN=hisH PE=3 SV=1	3.61243	8.32708	4.41326	7.94539
PputA514_3603	-	4.4412	0	0	7.94194
PputA514_0230	Protein HemY OS=Shigella flexneri GN=hemY PE=3 SV=1	11.6198	9.81844	9.60274	7.93677
PputA514_5584	Membrane protein YdfJ OS=Bacillus subtilis (strain 168) GN=ydfJ PE=2 SV=1	0	6.58841	7.89491	7.93645
PputA514_4511	Putative copper-binding protein OS=Pseudomonas stutzeri GN=scoP PE=3 SV=2	0	0	9.49653	7.92685
PputA514_2029	Ferrochelatase OS=Pseudomonas fluorescens (strain SBW25) GN=hemH PE=3 SV=1	9.35351	7.84887	9.05907	7.92063
PputA514_3828	Uncharacterized sugar kinase YegV OS=Escherichia coli (strain K12) GN=yegV PE=3 SV=1	0	0	8.15125	7.92063
PputA514_5627	Probable inorganic polyphosphate/ATP-NAD kinase OS=Pseudomonas fluorescens (strain SBW25) GN=ppnK PE=3 SV=1	0	3.51263	6.92235	7.91729
PputA514_2186	Glycogen operon protein GlgX homolog OS=Mycobacterium tuberculosis GN=glgX PE=3 SV=1	7.69628	0	9.15707	7.90614
PputA514_4685	Putative xanthine dehydrogenase YagS FAD-binding subunit OS=Escherichia coli (strain K12) GN=yagS PE=3 SV=1	3.58791	0	8.47735	7.89633
PputA514_5116	ATP-dependent RNA helicase RhlE OS=Escherichia coli (strain K12) GN=rhlE PE=1 SV=3	3.95731	8.578	7.28632	7.89247
PputA514_5904	1-(5-phosphoribosyl)-5-[(5-phosphoribosylamino)methylideneamino] imidazole-4-carboxamide isomerase OS=Pseudomonas fluorescens (strain SBW25) GN=hisA PE=3 SV=1	9.79235	9.11248	8.88542	7.89175
PputA514_2354	-	4.09363	3.6014	4.52596	7.87829
PputA514_3709	Putative phosphoenolpyruvate synthase regulatory protein OS=Pseudomonas fluorescens (strain SBW25) GN=PFLU_4621 PE=3 SV=1	0	8.46751	8.57374	7.87829
PputA514_4154	Holliday junction ATP-dependent DNA helicase RuvB OS=Pseudomonas fluorescens (strain SBW25) GN=ruvB PE=3 SV=1	3.74669	3.68014	3.33238	7.87482
PputA514_2107	hypothetical protein	4.01102	8.59482	4.23584	7.87406
PputA514_1356	hypothetical protein	4.12603	3.82113	7.53929	7.87335
PputA514_2604	Transcriptional regulator KdgR OS=Escherichia coli (strain K12) GN=kdgR PE=1 SV=1	0	0	7.03901	7.873
PputA514_4514	-	3.67644	3.84517	7.23941	7.86587
PputA514_3751	-	7.93739	7.72526	8.70574	7.86574
PputA514_0699	hypothetical protein	11.7797	11.7352	0	7.86166
PputA514_2513	Octopine permease ATP-binding protein P OS=Rhizobium meliloti GN=occP PE=3 SV=1	0	0	8.74971	7.86002
PputA514_5523	-	0	0	0	7.85996
PputA514_2735	Uncharacterized 104.1 kDa protein in hypE 3'region OS=Rhodobacter capsulatus PE=4 SV=1	6.07833	7.06069	8.18892	7.8562
PputA514_5864	Imidazolonepropionase OS=Pseudomonas fluorescens (strain Pf0-1) GN=hutI PE=3 SV=1	0	3.32142	7.48432	7.84779
PputA514_5723	DNA topoisomerase 4 subunit A OS=Pseudomonas aeruginosa (strain ATCC 15692 / PAO1 / 1C / PRS 101 / LMG 12228) GN=parC PE=3 SV=1	7.50122	8.15753	8.76376	7.84459
PputA514_0284	2-octaprenyl-6-methoxyphenol hydroxylase OS=Escherichia coli (strain K12) GN=ubiH PE=1 SV=2	3.82448	4.20819	4.12532	7.84009
PputA514_4497	DNA polymerase I OS=Pseudomonas aeruginosa (strain ATCC 15692 / PAO1 / 1C / PRS 101 / LMG 12228) GN=polA PE=3 SV=1	8.20596	8.77731	8.3994	7.83284
PputA514_0816	Acyl-coenzyme A dehydrogenase OS=Escherichia coli (strain K12) GN=fadE PE=2 SV=2	7.99731	3.76939	9.78712	7.82547
PputA514_3967	N-succinylarginine dihydrolase OS=Pseudomonas fluorescens (strain SBW25) GN=astB PE=3 SV=1	8.17625	8.94379	8.66534	7.81939
PputA514_2541	Extracellular serine protease OS=Serratia marcescens PE=1 SV=1	7.46957	0	5.68783	7.81429
PputA514_6296	-	3.96244	0	8.00755	7.80634
PputA514_5708	Bifunctional NAD(P)H-hydrate repair enzyme Nnr OS=Coxiella burnetii (strain RSA 493 / Nine Mile phase I) GN=nnr PE=3 SV=1	8.82374	7.89512	8.99411	7.80592
PputA514_4480	-	8.637	4.68838	7.46644	7.80044
PputA514_4937	-	7.94072	3.48191	8.25878	7.80031
PputA514_6189	Chemotaxis protein CheY OS=Salmonella typhimurium (strain LT2 / SGSC1412 / ATCC 700720) GN=cheY PE=1 SV=2	0	0	0	7.79248
PputA514_0397	Thiazole synthase OS=Pseudomonas fluorescens (strain SBW25) GN=thiG PE=3 SV=1	9.64171	10.2981	7.08739	7.78986
PputA514_0311	Gamma-glutamylputrescine synthetase PuuA OS=Escherichia coli (strain K12) GN=puuA PE=1 SV=2	2.77591	0	6.8421	7.78362
PputA514_3194	Fusaric acid resistance protein FusA OS=Burkholderia cepacia GN=fusA PE=3 SV=2	3.81092	9.65215	8.05682	7.77963
PputA514_0004	Chromosomal replication initiator protein DnaA OS=Pseudomonas fluorescens (strain SBW25) GN=dnaA PE=3 SV=1	8.63437	8.63663	8.67824	7.77525
PputA514_0945	Deoxyguanosinetriphosphate triphosphohydrolase-like protein OS=Pseudomonas aeruginosa (strain ATCC 15692 / PAO1 / 1C / PRS 101 / LMG 12228) GN=dgt2 PE=3 SV=1	3.87329	6.97137	8.46458	7.75957
PputA514_4771	Probable aromatic acid decarboxylase OS=Pseudomonas aeruginosa (strain ATCC 15692 / PAO1 / 1C / PRS 101 / LMG 12228) GN=PA4019 PE=1 SV=1	0	0	4.00087	7.75842
PputA514_3576	-	0	0	0	7.75359
PputA514_5034	Sarcosine oxidase subunit gamma OS=Corynebacterium sp. (strain P-1) GN=soxG PE=4 SV=1	0	0	7.62506	7.75151
PputA514_0265	3-octaprenyl-4-hydroxybenzoate carboxy-lyase OS=Pseudomonas fluorescens (strain SBW25) GN=ubiD PE=3 SV=1	3.30352	3.97225	7.86201	7.74256
PputA514_3914	Uncharacterized protein YydD OS=Bacillus subtilis (strain 168) GN=yydD PE=4 SV=1	3.18769	0	7.37308	7.74062
PputA514_2353	Undecaprenyl-phosphate 4-deoxy-4-formamido-L-arabinose transferase OS=Pseudomonas fluorescens (strain SBW25) GN=arnC PE=3 SV=1	8.09497	3.61176	7.2431	7.73809
PputA514_3831	Uncharacterized HTH-type transcriptional regulator YidP OS=Escherichia coli (strain K12) GN=yidP PE=1 SV=1	3.61243	0	8.11137	7.73786
PputA514_3667	-	8.28101	0	8.17513	7.73698
PputA514_5953	3-ketoacyl-CoA thiolase OS=Shewanella sp. (strain W3-18-1) GN=fadI PE=3 SV=1	8.2523	7.32369	8.11918	7.73448
PputA514_2790	Uncharacterized HTH-type transcriptional regulator YeeY OS=Escherichia coli (strain K12) GN=yeeY PE=4 SV=2	0	0	7.10571	7.73214
PputA514_2746	S-(hydroxymethyl)glutathione dehydrogenase OS=Methylobacter marinus GN=fdh PE=3 SV=2	3.32796	0	8.30032	7.73065
PputA514_0879	Uncharacterized protein RP093 OS=Rickettsia prowazekii (strain Madrid E) GN=RP093 PE=3 SV=1	8.02618	9.22909	8.70955	7.72484
PputA514_0144	Uncharacterized 24.6 kDa protein in ccpA 3'region OS=Bacillus megaterium GN=ytxE PE=3 SV=1	7.36137	0	9.04187	7.72097
PputA514_2021	Phosphate acetyltransferase OS=Pseudomonas putida (strain KT2440) GN=pta PE=3 SV=1	7.22167	8.17047	8.19383	7.71277
PputA514_4605	Poly(A) polymerase I OS=Escherichia coli (strain K12) GN=pcnB PE=1 SV=2	6.53138	6.68776	7.47202	7.70967
PputA514_2501	Universal stress protein E OS=Photorhabdus luminescens subsp. laumondii (strain TT01) GN=uspE PE=3 SV=1	11.1785	8.87786	3.14621	7.70367
PputA514_3460	Glutamate--cysteine ligase OS=Pseudomonas fluorescens (strain Pf0-1) GN=gshA PE=3 SV=1	7.46817	8.07105	8.50233	7.69628
PputA514_2013	4-hydroxy-3-methylbut-2-enyl diphosphate reductase OS=Pseudomonas fluorescens (strain SBW25) GN=ispH PE=3 SV=1	8.70744	9.34757	8.35561	7.68958
PputA514_3051	3-deoxy-manno-octulosonate cytidylyltransferase OS=Pseudomonas fluorescens (strain SBW25) GN=kdsB PE=3 SV=1	9.3472	8.06631	9.22806	7.68463
PputA514_6089	Uncharacterized oxidoreductase PA3106 OS=Pseudomonas aeruginosa (strain ATCC 15692 / PAO1 / 1C / PRS 101 / LMG 12228) GN=PA3106 PE=3 SV=1	0	0	3.56773	7.68463
PputA514_4308	Methionine aminotransferase OS=Escherichia coli (strain K12) GN=ybdL PE=1 SV=1	8.52875	9.431	9.06553	7.68084
PputA514_1285	TPR repeat-containing protein YfgC OS=Salmonella typhimurium (strain LT2 / SGSC1412 / ATCC 700720) GN=yfgC PE=3 SV=1	7.36925	7.56081	8.1024	7.67914
PputA514_5811	Glutamate synthase [NADPH] large chain OS=Escherichia coli (strain K12) GN=gltB PE=1 SV=3	4.08243	9.92202	8.34387	7.67786
PputA514_3371	Fe(3+) dicitrate-binding periplasmic protein OS=Escherichia coli (strain K12) GN=fecB PE=3 SV=3	9.3197	3.94471	6.43844	7.67611
PputA514_1205	Soluble lytic murein transglycosylase OS=Escherichia coli (strain K12) GN=slt PE=1 SV=1	7.65921	3.7688	7.45512	7.6719
PputA514_5159	3-phosphoshikimate 1-carboxyvinyltransferase OS=Pseudomonas syringae pv. syringae (strain B728a) GN=aroA PE=3 SV=1	8.44334	9.35091	8.28766	7.67139
PputA514_1015	Capsular polysaccharide biosynthesis protein CapD OS=Staphylococcus aureus GN=capD PE=3 SV=1	8.10295	3.66393	8.45461	7.67009
PputA514_6327	Probable acyl-CoA dehydrogenase 6 OS=Caenorhabditis elegans GN=acdh-6 PE=3 SV=2	3.18202	0	7.41151	7.66953
PputA514_3417	-	6.80931	0	7.93922	7.66894
PputA514_1044	Phosphoglycolate phosphatase 2 OS=Pseudomonas aeruginosa (strain ATCC 15692 / PAO1 / 1C / PRS 101 / LMG 12228) GN=gph2 PE=3 SV=1	10.5787	8.62257	9.03839	7.66486
PputA514_5765	Glutamate-ammonia-ligase adenylyltransferase OS=Pseudomonas syringae pv. tomato (strain DC3000) GN=glnE PE=3 SV=1	7.60155	8.67979	8.9956	7.66246
PputA514_1618	Sporulation kinase E OS=Bacillus subtilis (strain 168) GN=kinE PE=1 SV=1	2.87168	3.33288	8.02051	7.66001
PputA514_4077	HTH-type transcriptional regulator HexR OS=Pseudomonas aeruginosa (strain ATCC 15692 / PAO1 / 1C / PRS 101 / LMG 12228) GN=hexR PE=4 SV=2	0	0	3.18978	7.65934
PputA514_1821	Ribosomal RNA small subunit methyltransferase I OS=Pseudomonas aeruginosa (strain ATCC 15692 / PAO1 / 1C / PRS 101 / LMG 12228) GN=rsmI PE=3 SV=1	0	0	6.95186	7.65434
PputA514_5741	-	8.28764	8.81244	8.31323	7.64723
PputA514_5154	NADH pyrophosphatase OS=Pseudomonas fluorescens (strain Pf0-1) GN=nudC PE=3 SV=1	7.49245	8.52622	8.3105	7.64452
PputA514_3599	Type I secretion system membrane fusion protein PrsE OS=Rhizobium meliloti (strain 1021) GN=prsE PE=1 SV=1	6.77962	6.93599	8.26664	7.63924
PputA514_5626	Bis(5'-nucleosyl)-tetraphosphatase PrpE [asymmetrical] OS=Bacillus halodurans (strain ATCC BAA-125 / DSM 18197 / FERM 7344 / JCM 9153 / C-125) GN=prpE PE=3 SV=1	0	0	3.68687	7.63038
PputA514_1811	UDP-N-acetylglucosamine--N-acetylmuramyl-(pentapeptide) pyrophosphoryl-undecaprenol N-acetylglucosamine transferase OS=Pseudomonas fluorescens (strain SBW25) GN=murG PE=3 SV=1	3.59895	0	8.72915	7.62595
PputA514_5863	-	8.84336	7.99971	7.94497	7.61804
PputA514_0212	Flavin mononucleotide phosphatase YigB OS=Shigella flexneri GN=yigB PE=3 SV=1	8.20786	4.71927	8.28002	7.61404
PputA514_1112	Glucose--fructose oxidoreductase OS=Zymomonas mobilis subsp. mobilis (strain ATCC 31821 / ZM4 / CP4) GN=gfo PE=1 SV=2	3.36803	0	7.76921	7.60319
PputA514_4048	Biofilm dispersion protein BdlA OS=Pseudomonas aeruginosa (strain ATCC 15692 / PAO1 / 1C / PRS 101 / LMG 12228) GN=bdlA PE=1 SV=1	7.82078	0	7.1299	7.59541
PputA514_1601	Formate dehydrogenase subunit alpha OS=Methanocaldococcus jannaschii (strain ATCC 43067 / DSM 2661 / JAL-1 / JCM 10045 / NBRC 100440) GN=fdhA PE=3 SV=2	0	0	8.0539	7.59539
PputA514_5170	Trehalose synthase OS=Pimelobacter sp. (strain R48) GN=treS PE=3 SV=1	6.06823	2.58376	8.8126	7.59418
PputA514_1420	Putative pyridoxal-phosphate dependent protein F13B12.4 OS=Caenorhabditis elegans GN=F13B12.4 PE=1 SV=1	8.8757	10.0483	6.87907	7.58157
PputA514_4812	1-deoxy-D-xylulose-5-phosphate synthase OS=Pseudomonas fluorescens (strain SBW25) GN=dxs PE=3 SV=1	7.815	8.42481	8.04815	7.57829
PputA514_3788	-	9.0709	7.82355	3.47727	7.57336
PputA514_4138	Hemolysin OS=Serratia marcescens GN=shlA PE=1 SV=1	5.3604	0	0	7.57029
PputA514_4580	Sulfoxide reductase catalytic subunit YedY OS=Pseudomonas syringae pv. tomato (strain DC3000) GN=yedY PE=3 SV=1	0	7.15842	4.02473	7.56916
PputA514_2964	Carboxylesterase 1 OS=Pseudomonas fluorescens GN=estA PE=3 SV=1	3.81842	0	7.84206	7.56494
PputA514_2025	Putative GTP cyclohydrolase 1 type 2 OS=Pseudomonas aeruginosa (strain ATCC 15692 / PAO1 / 1C / PRS 101 / LMG 12228) GN=PA4445 PE=3 SV=1	0	0	0	7.56489
PputA514_6191	Methyl-accepting chemotaxis protein III OS=Escherichia coli (strain K12) GN=trg PE=1 SV=3	8.5826	0	6.73081	7.56472
PputA514_6196	Probable methyl-accepting chemotaxis protein BT9727_0469 OS=Bacillus thuringiensis subsp. konkukian (strain 97-27) GN=BT9727_0469 PE=3 SV=1	9.11481	9.05087	6.77048	7.55794
PputA514_4671	Inner membrane protein YjiY OS=Escherichia coli (strain K12) GN=yjiY PE=1 SV=2	7.99458	10.2407	8.69224	7.55442
PputA514_2017	Riboflavin biosynthesis protein RibF OS=Pseudomonas fluorescens GN=ribF PE=3 SV=1	0	8.79903	7.5539	7.54884
PputA514_4085	Uncharacterized sugar isomerase YihS OS=Escherichia coli (strain K12) GN=yihS PE=1 SV=2	11.0818	3.55447	0	7.54746
PputA514_5834	Poly(3-hydroxyalkanoate) polymerase 1 OS=Pseudomonas oleovorans GN=phaA PE=3 SV=1	7.14045	8.62444	8.5488	7.54661
PputA514_2948	Uncharacterized protein C285.05 OS=Schizosaccharomyces pombe (strain 972 / ATCC 24843) GN=SPCC285.05 PE=4 SV=1	3.26538	3.43413	3.96985	7.54372
PputA514_0214	Uncharacterized protein YigA OS=Salmonella typhimurium (strain LT2 / SGSC1412 / ATCC 700720) GN=yigA PE=4 SV=2	8.746	8.63017	8.66041	7.54099
PputA514_4239	-	10.1555	4.31593	8.97912	7.54097
PputA514_2331	Sensor protein GacS OS=Pseudomonas syringae pv. syringae GN=gacS PE=3 SV=1	0	0	8.51365	7.5403
PputA514_3193	Multidrug export protein EmrA OS=Escherichia coli (strain K12) GN=emrA PE=1 SV=2	6.76202	9.483	7.28762	7.53666
PputA514_3622	Methyl-accepting chemotaxis protein PctB OS=Pseudomonas aeruginosa (strain ATCC 15692 / PAO1 / 1C / PRS 101 / LMG 12228) GN=pctB PE=1 SV=1	7.93377	9.1291	7.08197	7.52713
PputA514_1511	Multidrug resistance protein MdtA OS=Photorhabdus luminescens subsp. laumondii (strain TT01) GN=mdtA PE=3 SV=1	3.19907	0	7.73816	7.52238
PputA514_0648	3-ketoacyl-CoA thiolase, mitochondrial OS=Bos taurus GN=ACAA2 PE=2 SV=1	0	3.83963	7.97418	7.51574
PputA514_1809	D-alanine--D-alanine ligase OS=Pseudomonas fluorescens (strain Pf0-1) GN=ddl PE=1 SV=1	0	3.64029	9.32029	7.51161
PputA514_4627	Dihydropteroate synthase OS=Shigella flexneri GN=folP PE=3 SV=1	4.30579	4.18218	7.33745	7.51042
PputA514_0041	Uncharacterized protein YnbC OS=Escherichia coli (strain K12) GN=ynbC PE=4 SV=1	6.3773	0	7.86438	7.50913
PputA514_0978	Putative 2-dehydropantoate 2-reductase OS=Nostoc sp. (strain PCC 7120 / UTEX 2576) GN=all1319 PE=3 SV=1	4.31318	4.35783	3.90647	7.50784
PputA514_1670	3-oxoacyl-[acyl-carrier-protein] reductase FabG OS=Thermotoga maritima (strain ATCC 43589 / MSB8 / DSM 3109 / JCM 10099) GN=fabG PE=3 SV=1	3.49638	0	7.67178	7.50578
PputA514_5702	GTPase HflX OS=Escherichia coli (strain K12) GN=hflX PE=1 SV=3	7.80141	7.29681	7.16605	7.50007
PputA514_5760	Protein InaA OS=Escherichia coli (strain K12) GN=inaA PE=1 SV=3	8.88631	8.45769	8.87351	7.50001
PputA514_0667	UvrABC system protein C OS=Pseudomonas fluorescens (strain SBW25) GN=uvrC PE=3 SV=1	3.48916	4.24289	8.15735	7.49135
PputA514_1194	LexA repressor OS=Pseudomonas chlororaphis GN=lexA PE=3 SV=1	4.2906	7.8615	4.59143	7.4798
PputA514_0164	Guanosine-3',5'-bis(diphosphate) 3'-pyrophosphohydrolase OS=Shigella flexneri GN=spoT PE=3 SV=1	7.03037	8.33143	8.46343	7.466
PputA514_5903	Imidazole glycerol phosphate synthase subunit HisF OS=Pseudomonas fluorescens (strain SBW25) GN=hisF PE=3 SV=1	7.60618	8.05497	3.77722	7.46577
PputA514_0950	hypothetical protein	9.38536	10.0065	8.62983	7.46386
PputA514_4826	Riboflavin biosynthesis protein RibD OS=Escherichia coli (strain K12) GN=ribD PE=1 SV=1	3.36681	7.11934	7.23131	7.45415
PputA514_6095	Bifunctional protein FolC OS=Escherichia coli (strain K12) GN=folC PE=1 SV=2	7.38181	8.62314	8.22617	7.44897
PputA514_1686	GTPase Era OS=Pseudomonas fluorescens (strain Pf0-1) GN=era PE=3 SV=1	3.36198	7.82617	4.06649	7.44446
PputA514_2383	Filamentous hemagglutinin OS=Bordetella pertussis (strain Tohama I / ATCC BAA-589 / NCTC 13251) GN=fhaB PE=1 SV=4	4.02308	3.31153	1.29368	7.44234
PputA514_5776	Bifunctional protein PutA OS=Escherichia coli (strain K12) GN=putA PE=1 SV=3	6.82809	7.77692	7.67243	7.43896
PputA514_5727	DNA topoisomerase 4 subunit B OS=Pseudomonas aeruginosa (strain ATCC 15692 / PAO1 / 1C / PRS 101 / LMG 12228) GN=parE PE=3 SV=1	8.786	8.42201	7.83784	7.4291
PputA514_0474	UPF0502 protein PFLU_2135 OS=Pseudomonas fluorescens (strain SBW25) GN=PFLU_2135 PE=3 SV=1	3.89143	0	8.8769	7.41842
PputA514_1947	Dipeptide transport system permease protein DppB OS=Escherichia coli (strain K12) GN=dppB PE=1 SV=1	9.06155	9.92541	9.66316	7.41218
PputA514_3973	HTH-type transcriptional regulator CdhR OS=Pseudomonas aeruginosa (strain ATCC 15692 / PAO1 / 1C / PRS 101 / LMG 12228) GN=cdhR PE=1 SV=1	7.3424	0	7.65154	7.40954
PputA514_1398	Uncharacterized signaling protein PA3311 OS=Pseudomonas aeruginosa (strain ATCC 15692 / PAO1 / 1C / PRS 101 / LMG 12228) GN=PA3311 PE=4 SV=1	3.14307	0	6.7809	7.40737
PputA514_1004	Uncharacterized NTE family protein Mb1092c OS=Mycobacterium bovis (strain ATCC BAA-935 / AF2122/97) GN=Mb1092c PE=3 SV=1	0	0	8.28629	7.40384
PputA514_3968	N-succinylglutamate 5-semialdehyde dehydrogenase OS=Pseudomonas fluorescens (strain SBW25) GN=astD PE=3 SV=1	7.6289	6.99271	7.20103	7.40353
PputA514_0152	hypothetical protein	3.19142	0	0	7.39592
PputA514_5155	Delta(3,5)-Delta(2,4)-dienoyl-CoA isomerase, mitochondrial OS=Rattus norvegicus GN=Ech1 PE=1 SV=2	0	3.57898	3.7388	7.38895
PputA514_1541	Methyl-accepting chemotaxis protein McpB OS=Bacillus subtilis (strain 168) GN=mcpB PE=1 SV=2	8.27528	7.34665	7.2159	7.38891
PputA514_0300	Acetylornithine deacetylase OS=Edwardsiella ictaluri (strain 93-146) GN=argE PE=3 SV=1	3.84108	8.56254	7.05434	7.38833
PputA514_4549	D-galactonate dehydratase OS=Ralstonia pickettii (strain 12J) GN=dgoD PE=1 SV=1	0	3.32868	6.7619	7.38833
PputA514_4316	Cytoskeleton protein RodZ OS=Escherichia coli (strain SMS-3-5 / SECEC) GN=rodZ PE=3 SV=1	8.52797	8.1843	8.53323	7.38761
PputA514_3278	Uncharacterized protein YtbQ OS=Bacillus subtilis (strain 168) GN=ytbQ PE=3 SV=1	0	3.88861	0	7.36773
PputA514_5468	Transketolase OS=Bacillus halodurans (strain ATCC BAA-125 / DSM 18197 / FERM 7344 / JCM 9153 / C-125) GN=tkt PE=3 SV=1	6.92697	0	8.71783	7.36255
PputA514_3970	Arginine N-succinyltransferase subunit alpha OS=Pseudomonas aeruginosa (strain ATCC 15692 / PAO1 / 1C / PRS 101 / LMG 12228) GN=astA PE=1 SV=2	0	3.70728	8.01913	7.35308
PputA514_5870	Glycine betaine-binding periplasmic protein OS=Escherichia coli (strain K12) GN=proX PE=1 SV=1	4.21686	8.09707	7.30537	7.34688
PputA514_4231	Transcriptional activator protein IrlR OS=Burkholderia pseudomallei (strain K96243) GN=irlR PE=3 SV=2	9.90359	10.548	9.50139	7.34676
PputA514_1877	Arabinose 5-phosphate isomerase KdsD OS=Pseudomonas aeruginosa (strain ATCC 15692 / PAO1 / 1C / PRS 101 / LMG 12228) GN=kdsD PE=1 SV=1	7.5588	8.37611	7.16045	7.33347
PputA514_1192	Beta-hexosaminidase OS=Pseudomonas aeruginosa (strain ATCC 15692 / PAO1 / 1C / PRS 101 / LMG 12228) GN=nagZ PE=3 SV=1	3.9066	4.57537	3.78478	7.3262
PputA514_5012	Uncharacterized protein MK0525 OS=Methanopyrus kandleri (strain AV19 / DSM 6324 / JCM 9639 / NBRC 100938) GN=MK0525 PE=4 SV=2	0	0	8.23809	7.2958
PputA514_5376	Protein CobW OS=Pseudomonas aeruginosa (strain ATCC 15692 / PAO1 / 1C / PRS 101 / LMG 12228) GN=cobW PE=3 SV=1	9.41609	11.6895	8.27945	7.29474
PputA514_0384	Probable coniferyl aldehyde dehydrogenase OS=Pseudomonas aeruginosa (strain ATCC 15692 / PAO1 / 1C / PRS 101 / LMG 12228) GN=calB PE=3 SV=1	3.03046	8.06688	8.43615	7.28149
PputA514_2500	Alcohol dehydrogenase OS=Cupriavidus necator GN=adh PE=3 SV=1	9.38029	8.47891	0	7.27848
PputA514_5675	Putative aldehyde dehydrogenase family 7 member A1 homolog OS=Caenorhabditis elegans GN=alh-9 PE=3 SV=2	0	4.32848	7.99247	7.27672
PputA514_1188	Transcription-repair-coupling factor OS=Haemophilus influenzae (strain ATCC 51907 / DSM 11121 / KW20 / Rd) GN=mfd PE=3 SV=1	7.24394	7.51145	8.3953	7.27586
PputA514_1181	Uncharacterized protein YqiK OS=Bacillus subtilis (strain 168) GN=yqiK PE=4 SV=2	3.52296	0	3.60862	7.26644
PputA514_1617	Acetoacetate metabolism regulatory protein AtoC OS=Escherichia coli (strain K12) GN=atoC PE=3 SV=2	8.99102	8.92362	7.27065	7.26567
PputA514_3839	UPF0755 protein HI_0457 OS=Haemophilus influenzae (strain ATCC 51907 / DSM 11121 / KW20 / Rd) GN=HI_0457 PE=3 SV=1	6.53138	3.21154	6.76445	7.25948
PputA514_4093	Uncharacterized signaling protein PA1727 OS=Pseudomonas aeruginosa (strain ATCC 15692 / PAO1 / 1C / PRS 101 / LMG 12228) GN=PA1727 PE=4 SV=1	8.22884	7.50773	7.82723	7.25754
PputA514_5759	-	7.92004	3.47971	8.06612	7.25746
PputA514_0347	Alkaline phosphatase isozyme conversion protein OS=Escherichia coli (strain K12) GN=iap PE=3 SV=1	0	6.18432	7.45723	7.25607
PputA514_1187	Transcription-repair-coupling factor OS=Escherichia coli (strain K12) GN=mfd PE=1 SV=2	0	0	3.99915	7.25502
PputA514_2613	Uncharacterized oxidoreductase YkvO OS=Bacillus subtilis (strain 168) GN=ykvO PE=3 SV=1	0	0	0	7.24853
PputA514_4865	UvrABC system protein A OS=Pseudomonas putida (strain KT2440) GN=uvrA PE=3 SV=1	3.76479	7.04082	7.66134	7.24414
PputA514_2813	Ornithine utilization regulator OS=Pseudomonas aeruginosa (strain ATCC 15692 / PAO1 / 1C / PRS 101 / LMG 12228) GN=oruR PE=4 SV=1	4.57552	7.33205	7.20129	7.24283
PputA514_0649	Putative long-chain-fatty-acid--CoA ligase OS=Haemophilus influenzae (strain ATCC 51907 / DSM 11121 / KW20 / Rd) GN=HI_0002 PE=3 SV=1	0	5.87674	8.26809	7.24091
PputA514_0097	Aspartate ammonia-lyase OS=Pseudomonas fluorescens GN=aspA PE=3 SV=1	3.32452	7.69569	6.74303	7.23799
PputA514_6299	Probable septum site-determining protein MinC OS=Pseudomonas fluorescens (strain SBW25) GN=minC PE=3 SV=1	4.30055	9.64055	9.03604	7.23666
PputA514_1529	-	3.11075	0	3.20402	7.23444
PputA514_2996	Alpha-ketoglutaric semialdehyde dehydrogenase OS=Acinetobacter baylyi (strain ATCC 33305 / BD413 / ADP1) GN=ACIAD0131 PE=1 SV=1	7.72825	7.60103	7.93376	7.21937
PputA514_3560	-	0	0	0	7.21385
PputA514_4619	tRNA pseudouridine synthase B OS=Pseudomonas fluorescens (strain Pf-5 / ATCC BAA-477) GN=truB PE=3 SV=1	0	0	3.43574	7.21315
PputA514_4338	S-adenosylmethionine:tRNA ribosyltransferase-isomerase OS=Pseudomonas fluorescens (strain SBW25) GN=queA PE=3 SV=1	3.90355	4.9963	7.45661	7.20568
PputA514_3456	Osmolarity sensor protein EnvZ OS=Salmonella typhi GN=envZ PE=3 SV=2	7.89932	4.34435	3.18395	7.19431
PputA514_6354	Flagellar biosynthesis protein FlhF OS=Pseudomonas putida GN=flhF PE=3 SV=1	6.83135	0	3.17472	7.19101
PputA514_3995	Glutamine transport ATP-binding protein GlnQ OS=Geobacillus stearothermophilus GN=glnQ PE=2 SV=1	0	0	3.28287	7.18461
PputA514_1369	Probable efflux pump membrane transporter TtgB OS=Pseudomonas putida (strain KT2440) GN=ttgB PE=1 SV=1	7.80178	9.07029	9.10739	7.17961
PputA514_5413	Hydroxyacylglutathione hydrolase OS=Pseudomonas fluorescens (strain SBW25) GN=gloB PE=3 SV=1	0	8.56062	0	7.17894
PputA514_2627	Toluene-4-sulfonate monooxygenase system iron-sulfur subunit TsaM1 OS=Comamonas testosteroni GN=tsaM1 PE=1 SV=1	0	0	8.50273	7.17576
PputA514_3581	-	0	0	0	7.17476
PputA514_4925	ABC transporter protein AbcA OS=Aeromonas salmonicida GN=abcA PE=3 SV=1	3.23421	3.54203	8.39835	7.17461
PputA514_2710	Uncharacterized oxidoreductase YxnA OS=Bacillus subtilis (strain 168) GN=yxnA PE=3 SV=2	0	0	8.28149	7.16207
PputA514_1514	Ribosomal RNA small subunit methyltransferase J OS=Pseudomonas fluorescens (strain SBW25) GN=rsmJ PE=3 SV=1	7.8763	8.03262	8.22061	7.1509
PputA514_5338	3D-(3,5/4)-trihydroxycyclohexane-1,2-dione hydrolase OS=Bacillus cereus (strain 03BB102) GN=iolD PE=3 SV=1	0	4.21053	7.53279	7.13707
PputA514_4958	-	8.97141	3.47971	0	7.13488
PputA514_5664	Mannose-6-phosphate isomerase OS=Rhizobium meliloti (strain 1021) GN=pmi PE=3 SV=1	3.49735	3.66609	0	7.13028
PputA514_6446	GTP pyrophosphokinase OS=Shigella flexneri GN=relA PE=3 SV=1	7.86857	8.03221	9.09984	7.12832
PputA514_4264	Signal recognition particle protein OS=Escherichia coli (strain K12) GN=ffh PE=1 SV=1	9.26415	9.08427	7.98874	7.12663
PputA514_3614	Phytochrome-like protein cph2 OS=Synechocystis sp. (strain PCC 6803 / Kazusa) GN=cph2 PE=1 SV=1	7.4625	7.32635	8.1234	7.12595
PputA514_6454	Agmatinase, mitochondrial OS=Gallus gallus GN=AGMAT PE=2 SV=1	0	0	4.29361	7.12149
PputA514_2026	Probable periplasmic serine endoprotease DegP-like OS=Pseudomonas putida (strain W619) GN=PputW619_1070 PE=3 SV=1	3.30963	6.91475	6.99155	7.11804
PputA514_1547	Ribosomal protein S12 methylthiotransferase RimO OS=Pseudomonas fluorescens (strain Pf0-1) GN=rimO PE=3 SV=1	3.4532	3.44077	0	7.1126
PputA514_5687	Replicative DNA helicase OS=Shigella flexneri GN=dnaB PE=3 SV=1	0	3.68839	3.14066	7.10781
PputA514_3081	Siroheme synthase OS=Pseudomonas fluorescens (strain SBW25) GN=cysG PE=3 SV=1	3.54738	7.40453	6.27378	7.10776
PputA514_3062	2-hydroxyacid dehydrogenase homolog OS=Haemophilus influenzae (strain ATCC 51907 / DSM 11121 / KW20 / Rd) GN=ddh PE=3 SV=1	0	0	3.0962	7.10383
PputA514_2794	Lysine-arginine-ornithine-binding periplasmic protein OS=Escherichia coli (strain K12) GN=argT PE=1 SV=3	0	3.58165	7.7678	7.1018
PputA514_4506	Methionine import ATP-binding protein MetN 1 OS=Pseudomonas fluorescens (strain Pf0-1) GN=metN1 PE=3 SV=1	3.57487	8.45947	7.40472	7.07777
PputA514_6117	UvrABC system protein B OS=Pseudomonas fluorescens (strain Pf-5 / ATCC BAA-477) GN=uvrB PE=3 SV=1	7.78063	7.61831	5.74167	7.07563
PputA514_1675	Probable HTH-type transcriptional regulator YjjM OS=Escherichia coli (strain K12) GN=yjjM PE=2 SV=2	0	0	3.96776	7.03951
PputA514_0156	ATP-dependent DNA helicase RecG OS=Haemophilus influenzae (strain ATCC 51907 / DSM 11121 / KW20 / Rd) GN=recG PE=3 SV=1	6.38685	3.65399	7.90746	7.039
PputA514_2587	Ornithine utilization regulator OS=Pseudomonas aeruginosa (strain ATCC 15692 / PAO1 / 1C / PRS 101 / LMG 12228) GN=oruR PE=4 SV=1	3.75493	0	7.05727	7.02281
PputA514_2190	Maltooligosyl trehalose synthase OS=Arthrobacter sp. (strain Q36) GN=treY PE=1 SV=1	8.53448	0	8.41341	7.02238
PputA514_0390	Uncharacterized zinc protease y4wA OS=Rhizobium sp. (strain NGR234) GN=NGR_a01040 PE=3 SV=1	3.56788	6.44549	3.7724	7.01728
PputA514_4133	Quinolinate synthase A OS=Pseudomonas fluorescens (strain Pf0-1) GN=nadA PE=3 SV=1	8.10018	7.46405	7.1723	7.00639
PputA514_0881	-	0	0	3.04341	6.99816
PputA514_1219	hypothetical protein	0	0	8.44449	6.986
PputA514_3431	C4-dicarboxylate transport transcriptional regulatory protein DctD OS=Rhizobium meliloti (strain 1021) GN=dctD PE=1 SV=3	7.55	6.41387	7.39437	6.98567
PputA514_6245	Uncharacterized protein in chlN 3'region (Fragment) OS=Leptolyngbya boryana PE=4 SV=1	8.21102	8.51209	8.23662	6.98561
PputA514_1123	Uncharacterized 104.1 kDa protein in hypE 3'region OS=Rhodobacter capsulatus PE=4 SV=1	6.40132	6.48887	7.45631	6.98462
PputA514_0149	ppkA-like protein	3.22849	0	7.50438	6.96995
PputA514_1609	Glycerol-3-phosphate dehydrogenase OS=Pseudomonas tolaasii GN=glpD PE=3 SV=1	7.69116	0	2.77714	6.96576
PputA514_0566	N-substituted formamide deformylase OS=Arthrobacter pascens GN=nfdA PE=1 SV=1	0	8.30667	5.8257	6.95222
PputA514_5334	Putative ribose/galactose/methyl galactoside import ATP-binding protein OS=Pseudomonas fluorescens (strain Pf-5 / ATCC BAA-477) GN=PFL_2594 PE=3 SV=1	6.38459	4.01404	7.7787	6.95173
PputA514_1790	Chemotaxis protein CheV OS=Bacillus subtilis (strain 168) GN=cheV PE=1 SV=1	7.37737	8.35563	0	6.94449
PputA514_1035	3-phosphoshikimate 1-carboxyvinyltransferase OS=Methylococcus capsulatus (strain ATCC 33009 / NCIMB 11132 / Bath) GN=aroA PE=3 SV=2	2.71464	6.39992	6.31572	6.94225
PputA514_1999	NADH dehydrogenase	6.6438	0	2.8998	6.91847
PputA514_5408	Biodegradative arginine decarboxylase OS=Escherichia coli (strain K12) GN=adiA PE=1 SV=1	0	0	7.24008	6.91307
PputA514_0484	Methyl-accepting chemotaxis protein PctC OS=Pseudomonas aeruginosa (strain ATCC 15692 / PAO1 / 1C / PRS 101 / LMG 12228) GN=pctC PE=1 SV=1	7.20933	7.9234	6.01848	6.88766
PputA514_4737	(Dimethylallyl)adenosine tRNA methylthiotransferase MiaB OS=Pseudomonas fluorescens (strain Pf-5 / ATCC BAA-477) GN=miaB PE=3 SV=1	6.61075	0	6.71235	6.88537
PputA514_2116	hypothetical protein	8.86318	9.05998	6.85728	6.87253
PputA514_5128	4-aminobutyrate aminotransferase GabT OS=Escherichia coli (strain K12) GN=gabT PE=1 SV=1	0	3.24472	3.37678	6.87241
PputA514_4598	Probable aspartate aminotransferase 2 OS=Methanocaldococcus jannaschii (strain ATCC 43067 / DSM 2661 / JAL-1 / JCM 10045 / NBRC 100440) GN=MJ0684 PE=1 SV=2	3.17268	3.3415	0	6.85847
PputA514_3211	Methylcrotonoyl-CoA carboxylase subunit alpha, mitochondrial OS=Dictyostelium discoideum GN=mccA PE=3 SV=1	0	0	8.07976	6.84907
PputA514_3285	Sulfide:quinone oxidoreductase, mitochondrial OS=Homo sapiens GN=SQRDL PE=1 SV=1	0	3.96732	6.71723	6.84375
PputA514_0919	Cytochrome c-type biogenesis protein CycH OS=Pseudomonas fluorescens GN=cycH PE=3 SV=1	8.73006	6.64041	8.06744	6.84372
PputA514_4361	Cyanobacterial phytochrome B OS=Nostoc sp. (strain PCC 7120 / UTEX 2576) GN=bphB PE=3 SV=1	3.20876	6.95687	3.30204	6.83417
PputA514_4129	L-serine dehydratase OS=Streptomyces coelicolor (strain ATCC BAA-471 / A3(2) / M145) GN=sdaA PE=3 SV=1	6.26696	3.99024	6.50012	6.83412
PputA514_5447	Uncharacterized transcriptional regulator YjhU OS=Escherichia coli (strain K12) GN=yjhU PE=3 SV=2	3.80647	0	3.39974	6.83344
PputA514_3919	-	6.1803	7.66431	6.41343	6.81619
PputA514_5196	Mannitol 2-dehydrogenase OS=Phaeosphaeria nodorum (strain SN15 / ATCC MYA-4574 / FGSC 10173) GN=SNOG_09898 PE=3 SV=1	0	0	3.08936	6.81286
PputA514_6443	Ferric aerobactin receptor OS=Klebsiella pneumoniae GN=iutA PE=1 SV=1	3.64832	0	7.46077	6.79474
PputA514_5363	Methionine gamma-lyase OS=Pseudomonas putida GN=mdeA PE=1 SV=2	0	0	6.73075	6.77227
PputA514_6488	Methyl-accepting chemotaxis protein NahY OS=Pseudomonas putida GN=nahY PE=4 SV=1	0	7.26797	0	6.75478
PputA514_1733	D-alanyl-D-alanine carboxypeptidase DacC OS=Bacillus subtilis (strain 168) GN=dacC PE=1 SV=1	6.6843	7.7941	7.4821	6.75146
PputA514_6023	Aliphatic amidase expression-regulating protein OS=Pseudomonas aeruginosa (strain ATCC 15692 / PAO1 / 1C / PRS 101 / LMG 12228) GN=amiC PE=1 SV=5	0	0	2.91834	6.74812
PputA514_6122	-	3.76115	3.69461	3.06196	6.74286
PputA514_5197	Xylulose kinase OS=Haemophilus influenzae (strain ATCC 51907 / DSM 11121 / KW20 / Rd) GN=xylB PE=3 SV=1	7.56442	7.69451	8.47379	6.72789
PputA514_4653	-	3.51456	6.9704	7.40109	6.72024
PputA514_2159	L-sorbosone dehydrogenase OS=Gluconacetobacter liquefaciens PE=4 SV=1	8.51896	0	8.10228	6.71758
PputA514_5220	Probable autotransporter ROD_p1121 OS=Citrobacter rodentium (strain ICC168) GN=ROD_p1121 PE=1 SV=1	7.93093	0	0	6.70558
PputA514_5187	Multidrug resistance protein MdtA OS=Dickeya dadantii (strain Ech586) GN=mdtA PE=3 SV=1	7.50557	4.05685	6.3702	6.70423
PputA514_3588	Uncharacterized protein YdhJ OS=Escherichia coli (strain K12) GN=ydhJ PE=3 SV=2	0	0	6.56122	6.68775
PputA514_2335	UDP-N-acetylglucosamine--peptide N-acetylglucosaminyltransferase 110 kDa subunit OS=Rattus norvegicus GN=Ogt PE=1 SV=1	9.55351	8.85964	7.9161	6.6855
PputA514_0392	Cell division protein FtsX OS=Pseudomonas putida GN=ftsX PE=3 SV=1	8.55568	8.41952	8.75935	6.66937
PputA514_0271	Glycerol-3-phosphate transporter OS=Escherichia coli (strain K12) GN=glpT PE=1 SV=1	0	0	6.99509	6.66808
PputA514_0009	tRNA uridine 5-carboxymethylaminomethyl modification enzyme MnmG OS=Pseudomonas fluorescens (strain Pf-5 / ATCC BAA-477) GN=mnmG PE=3 SV=1	7.00313	8.64646	5.54007	6.66652
PputA514_2337	Acetyl-coenzyme A synthetase OS=Bacillus subtilis (strain 168) GN=acsA PE=1 SV=1	3.07943	8.29525	7.80329	6.65762
PputA514_4729	Putative acyl-CoA dehydrogenase AidB OS=Escherichia coli (strain K12) GN=aidB PE=1 SV=3	2.926	0	7.03114	6.65762
PputA514_6150	Methyl-accepting chemotaxis protein PctC OS=Pseudomonas aeruginosa (strain ATCC 15692 / PAO1 / 1C / PRS 101 / LMG 12228) GN=pctC PE=1 SV=1	0	8.24625	3.06721	6.65694
PputA514_0029	UPF0192 protein YPO2573/y1143/YP_1141 OS=Yersinia pestis GN=YPO2573 PE=3 SV=1	5.34496	2.6989	7.49464	6.65492
PputA514_6250	Asparagine synthetase [glutamine-hydrolyzing] 1 OS=Bacillus subtilis (strain 168) GN=asnB PE=1 SV=2	8.53029	4.04286	7.7197	6.62966
PputA514_2163	Methyl-accepting chemotaxis protein PctA OS=Pseudomonas aeruginosa (strain ATCC 15692 / PAO1 / 1C / PRS 101 / LMG 12228) GN=pctA PE=1 SV=1	3.45764	8.16414	3.18237	6.62142
PputA514_1230	Protease 2 OS=Escherichia coli (strain K12) GN=ptrB PE=1 SV=2	2.85478	6.31188	6.54959	6.59109
PputA514_3558	Hemolysin OS=Serratia marcescens GN=shlA PE=1 SV=1	2.62775	0	2.27514	6.5728
PputA514_0135	hypothetical protein	3.33946	0	7.4157	6.56046
PputA514_1472	DNA polymerase III subunit alpha OS=Pseudomonas fluorescens GN=dnaE PE=3 SV=1	5.40763	6.14897	5.72588	6.55986
PputA514_4696	Hexuronate transporter OS=Escherichia coli (strain K12) GN=exuT PE=1 SV=1	0	3.94892	3.47727	6.54393
PputA514_6010	Precorrin-6Y C(5,15)-methyltransferase [decarboxylating] OS=Pseudomonas aeruginosa (strain ATCC 15692 / PAO1 / 1C / PRS 101 / LMG 12228) GN=cobL PE=3 SV=1	6.45865	3.95462	3.23835	6.52581
PputA514_6256	Uncharacterized protein HI_1246 OS=Haemophilus influenzae (strain ATCC 51907 / DSM 11121 / KW20 / Rd) GN=HI_1246 PE=4 SV=1	7.75031	8.65791	8.25974	6.52498
PputA514_2940	Nicotinate phosphoribosyltransferase 1 OS=Pseudomonas aeruginosa (strain ATCC 15692 / PAO1 / 1C / PRS 101 / LMG 12228) GN=pncB1 PE=3 SV=1	0	0	3.23884	6.51158
PputA514_5433	Blue-light-activated protein OS=Pseudomonas syringae pv. phaseolicola (strain 1448A / Race 6) GN=PSPPH_2483 PE=3 SV=2	3.15444	3.32323	7.77537	6.48285
PputA514_0425	Chemotaxis protein CheA OS=Treponema pallidum (strain Nichols) GN=cheA PE=3 SV=2	6.01188	6.62164	6.6984	6.48266
PputA514_4741	Apolipoprotein N-acyltransferase OS=Pseudomonas syringae pv. tomato (strain DC3000) GN=lnt PE=3 SV=1	7.55963	8.00843	7.98198	6.46579
PputA514_0072	DNA helicase II OS=Escherichia coli (strain K12) GN=uvrD PE=1 SV=1	3.7235	6.34172	6.287	6.45998
PputA514_0423	Protein PilJ OS=Pseudomonas aeruginosa (strain ATCC 15692 / PAO1 / 1C / PRS 101 / LMG 12228) GN=pilJ PE=4 SV=1	6.36338	3.34973	5.96498	6.43046
PputA514_4172	Signal transduction histidine-protein kinase AtoS OS=Escherichia coli (strain K12) GN=atoS PE=3 SV=1	0	2.94254	3.5205	6.42913
PputA514_6377	Flagellar M-ring protein OS=Pseudomonas aeruginosa (strain ATCC 15692 / PAO1 / 1C / PRS 101 / LMG 12228) GN=fliF PE=3 SV=2	3.42631	3.43413	2.56608	6.41227
PputA514_2791	Putative gamma-glutamyltransferase YwrD OS=Bacillus subtilis (strain 168) GN=ywrD PE=1 SV=1	3.60429	0	3.3215	6.39966
PputA514_1378	Alpha-ketoglutarate permease OS=Shigella flexneri GN=kgtP PE=3 SV=1	3.38151	8.86517	7.22548	6.39855
PputA514_5469	UvrABC system protein A (Fragment) OS=Paucimonas lemoignei GN=uvrA PE=3 SV=1	2.82337	2.99207	2.62415	6.36732
PputA514_1832	Paraquat-inducible protein B OS=Escherichia coli (strain K12) GN=pqiB PE=2 SV=2	2.92086	3.06185	3.01417	6.3546
PputA514_5974	-	0	0	7.77641	6.31786
PputA514_0647	Isobutyryl-CoA dehydrogenase, mitochondrial OS=Dictyostelium discoideum GN=acad8 PE=3 SV=1	0	0	0	6.31098
PputA514_6487	Isocitrate dehydrogenase kinase/phosphatase OS=Pseudomonas fluorescens (strain Pf0-1) GN=aceK PE=3 SV=1	2.89773	0	7.00389	6.30849
PputA514_4768	MORN repeat-containing protein 1 OS=Homo sapiens GN=MORN1 PE=2 SV=2	3.89646	6.39512	6.26439	6.30589
PputA514_3601	Leukotoxin translocation ATP-binding protein LktB OS=Aggregatibacter actinomycetemcomitans GN=lktB PE=3 SV=1	3.22503	6.16048	6.96705	6.27885
PputA514_0659	Transcriptional regulatory protein XylR OS=Pseudomonas putida GN=xylR PE=4 SV=1	2.88144	3.02242	0	6.27603
PputA514_2188	hypothetical protein	14.136	11.2032	13.52	6.27405
PputA514_6049	RNA polymerase-associated protein RapA OS=Pseudomonas entomophila (strain L48) GN=rapA PE=3 SV=1	6.00287	5.45161	5.52853	6.23101
PputA514_0849	Autoinducer 2 sensor kinase/phosphatase LuxQ OS=Vibrio cholerae serotype O1 (strain ATCC 39315 / El Tor Inaba N16961) GN=luxQ PE=1 SV=1	0	2.99207	5.53322	6.15966
PputA514_6430	L-sorbosone dehydrogenase OS=Gluconacetobacter liquefaciens PE=4 SV=1	9.1693	0	3.2688	6.15652
PputA514_4902	50S ribosomal protein L7/L12 OS=Pseudomonas fluorescens (strain SBW25) GN=rplL PE=3 SV=1	15.8997	14.2677	12.608	6.15314
PputA514_3322	Xylulose kinase OS=Bacillus subtilis (strain 168) GN=xylB PE=3 SV=2	0	0	4.04537	6.13984
PputA514_3030	-	2.70774	0	0	6.1361
PputA514_0678	Uncharacterized protein MJ0590 OS=Methanocaldococcus jannaschii (strain ATCC 43067 / DSM 2661 / JAL-1 / JCM 10045 / NBRC 100440) GN=MJ0590 PE=4 SV=1	2.94874	7.29217	8.39842	6.11809
PputA514_3922	-	5.83189	3.0036	5.80789	6.10665
PputA514_2804	Uncharacterized peptidase y4nA OS=Rhizobium sp. (strain NGR234) GN=NGR_a02410 PE=3 SV=1	0	2.95224	3.24529	6.07993
PputA514_2384	Hemolysin transporter protein HpmB OS=Proteus mirabilis GN=hpmB PE=3 SV=1	0	0	2.98093	6.01087
PputA514_5681	Uncharacterized protein Rv2567/MT2643 OS=Mycobacterium tuberculosis GN=Rv2567 PE=4 SV=2	5.91274	5.86151	6.34197	5.97984
PputA514_1266	-	0	0	6.6087	5.95141
PputA514_5769	Uncharacterized signaling protein PA3311 OS=Pseudomonas aeruginosa (strain ATCC 15692 / PAO1 / 1C / PRS 101 / LMG 12228) GN=PA3311 PE=4 SV=1	6.25072	3.03315	5.61535	5.94928
PputA514_5169	1,4-alpha-glucan branching enzyme GlgB OS=Pseudomonas fluorescens (strain Pf0-1) GN=glgB PE=3 SV=1	2.70588	0	6.95915	5.92463
PputA514_3847	50S ribosomal protein L32 OS=Pseudomonas syringae pv. syringae (strain B728a) GN=rpmF PE=3 SV=1	12.9532	12.303	11.997	5.92196
PputA514_5375	Aerobic cobaltochelatase subunit CobN OS=Pseudomonas aeruginosa (strain ATCC 15692 / PAO1 / 1C / PRS 101 / LMG 12228) GN=cobN PE=3 SV=1	0	3.58451	0	5.83568
PputA514_4618	30S ribosomal protein S15 OS=Pseudomonas fluorescens (strain SBW25) GN=rpsO PE=3 SV=1	15.0349	13.5093	13.3522	5.7985
PputA514_3843	Acyl carrier protein OS=Pseudomonas fluorescens (strain Pf0-1) GN=acpP PE=3 SV=1	16.2353	15.5854	13.228	5.7327
PputA514_3090	Translation initiation factor IF-1 OS=Pseudomonas stutzeri (strain A1501) GN=infA PE=3 SV=1	13.2353	10.2887	11.1916	5.72768
PputA514_4892	50S ribosomal protein L23 OS=Pseudomonas syringae pv. syringae (strain B728a) GN=rplW PE=3 SV=1	12.173	12.5368	11.3686	5.72169
PputA514_5913	-	8.03811	7.6387	7.39682	5.64586
PputA514_1428	Beta-agarase B OS=Vibrio sp. (strain JT0107) GN=agaB PE=3 SV=1	2.97919	3.4887	6.16357	5.59393
PputA514_5782	Mechanosensitive channel MscK OS=Escherichia coli (strain K12) GN=mscK PE=1 SV=1	6.56187	6.21816	5.87096	5.54394
PputA514_3675	Chromosome partition protein Smc OS=Coxiella burnetii (strain RSA 493 / Nine Mile phase I) GN=smc PE=3 SV=1	2.88515	5.87252	6.35306	5.49082
PputA514_4599	RNA polymerase-binding transcription factor DksA OS=Salmonella typhimurium (strain LT2 / SGSC1412 / ATCC 700720) GN=dksA PE=3 SV=1	12.5675	5.44898	10.7683	5.48309
PputA514_4263	30S ribosomal protein S16 OS=Pseudomonas fluorescens (strain SBW25) GN=rpsP PE=3 SV=1	13.4061	13.1686	12.7586	5.48037
PputA514_1503	Glycerol-3-phosphate acyltransferase OS=Pseudomonas fluorescens (strain SBW25) GN=plsB PE=3 SV=1	5.90217	0	6.5888	5.46938
PputA514_0139	type VI secretion protein	11.9444	4.93109	11.9202	5.44642
PputA514_3826	-	13.0888	10.2565	12.6372	5.43817
PputA514_1499	Probable glucan endo-1,3-beta-glucosidase btgC OS=Aspergillus clavatus (strain ATCC 1007 / CBS 513.65 / DSM 816 / NCTC 3887 / NRRL 1) GN=btgC PE=3 SV=1	6.30144	2.766	6.53451	5.41513
PputA514_4159	Aspartate--tRNA ligase OS=Pseudomonas fluorescens (strain SBW25) GN=aspS PE=3 SV=1	5.877	0	4.85179	5.41478
PputA514_0179	50S ribosomal protein L33 OS=Pseudomonas syringae pv. tomato (strain DC3000) GN=rpmG PE=3 SV=1	14.4352	14.6285	10.3278	5.40768
PputA514_4074	6-phosphogluconolactonase OS=Pseudomonas putida GN=pgl PE=3 SV=1	9.74477	0	0	5.37167
PputA514_5178	-	0	0	0	5.34216
PputA514_0941	Uncharacterized protein YqjD OS=Shigella flexneri GN=yqjD PE=3 SV=1	14.1999	12.1765	12.297	5.32512
PputA514_0293	hypothetical protein	0	0	0	5.31767
PputA514_4759	Ribosomal silencing factor RsfS OS=Shigella flexneri GN=rsfS PE=3 SV=1	10.4533	9.40496	5.1834	5.30782
PputA514_0829	hypothetical protein	10.2174	0	5.06208	5.29789
PputA514_1658	Fimbria A protein OS=Serratia marcescens GN=smfA PE=1 SV=1	15.0796	0	4.1457	5.29044
PputA514_1952	-	0	0	0	5.28191
PputA514_4886	50S ribosomal protein L29 OS=Pseudomonas putida (strain W619) GN=rpmC PE=3 SV=1	16.1676	15.128	14.0533	5.25525
PputA514_0424	CheA signal transduction histidine kinase	7.34652	6.71038	3.24801	5.25277
PputA514_4882	-	0	0	5.39092	5.19663
PputA514_0031	UPF0192 protein YPO2573/y1143/YP_1141 OS=Yersinia pestis GN=YPO2573 PE=3 SV=1	0	0	3.94102	5.19139
PputA514_3682	Uxu operon regulator OS=Haemophilus influenzae (strain ATCC 51907 / DSM 11121 / KW20 / Rd) GN=uxuR PE=3 SV=1	11.2259	10.1309	10.5985	5.17354
PputA514_1808	D-alanine--D-alanine ligase OS=Pseudomonas entomophila (strain L48) GN=ddl PE=3 SV=1	0	0	0	5.15642
PputA514_4828	-	10.5639	10.77	10.3013	5.13213
PputA514_5815	-	4.4993	0	5.25356	5.10583
PputA514_5383	Fe/S biogenesis protein NfuA OS=Pseudomonas fluorescens (strain SBW25) GN=nfuA PE=3 SV=1	11.7283	10.4122	10.7054	5.092
PputA514_6056	50S ribosomal protein L35 OS=Pseudomonas syringae pv. syringae (strain B728a) GN=rpmI PE=3 SV=1	11.6062	5.30611	4.85456	5.08292
PputA514_3045	-	4.6186	0	9.31693	5.07174
PputA514_5949	Copper transport protein ATOX1 homolog OS=Dictyostelium discoideum GN=atox1 PE=3 SV=2	14.4369	7.27483	0	5.06818
PputA514_4677	Large-conductance mechanosensitive channel OS=Pseudomonas fluorescens (strain SBW25) GN=mscL PE=3 SV=1	9.79013	10.8372	11.5204	5.03611
PputA514_4347	Uncharacterized protein YjqA OS=Bacillus subtilis (strain 168) GN=yjqA PE=4 SV=1	5.1661	5.17388	9.85022	5.02279
PputA514_6409	Non-motile and phage-resistance protein OS=Caulobacter crescentus (strain ATCC 19089 / CB15) GN=pleC PE=1 SV=2	0	0	4.9567	4.9984
PputA514_0924	Cytochrome c-type biogenesis protein CcmE OS=Pseudomonas fluorescens (strain SBW25) GN=ccmE PE=3 SV=1	0	0	0	4.95231
PputA514_0012	Probable chromosome-partitioning protein ParB OS=Pseudomonas putida GN=parB PE=3 SV=1	10.5062	9.69701	9.11283	4.94642
PputA514_5888	Secreted chorismate mutase OS=Mycobacterium smegmatis (strain ATCC 700084 / mc(2)155) GN=MSMEG_2111 PE=1 SV=1	9.46666	9.28679	9.44852	4.93002
PputA514_4114	Protein YciI OS=Shigella flexneri GN=yciI PE=3 SV=1	11.9362	5.83046	11.9093	4.92921
PputA514_1116	16 kDa heat shock protein B OS=Azotobacter vinelandii GN=ibpB PE=3 SV=1	10.1527	12.5442	5.19672	4.91746
PputA514_2715	-	0	0	9.76604	4.91478
PputA514_4752	UPF0250 protein PFLU_5418 OS=Pseudomonas fluorescens (strain SBW25) GN=PFLU_5418 PE=3 SV=1	10.7416	5.1778	10.3987	4.90064
PputA514_4563	Peptide deformylase OS=Pseudomonas stutzeri (strain A1501) GN=def PE=3 SV=1	10.6613	8.45516	9.97462	4.88677
PputA514_4327	NifU-like protein OS=Haemophilus influenzae (strain ATCC 51907 / DSM 11121 / KW20 / Rd) GN=nifU PE=1 SV=2	4.12978	0	8.42426	4.88286
PputA514_0707	hypothetical protein	9.70113	8.33527	9.08832	4.87836
PputA514_5009	-	12.0891	11.9675	11.6362	4.87823
PputA514_3956	-	9.14376	0	9.58441	4.86645
PputA514_0954	Peptide methionine sulfoxide reductase MsrB OS=Pseudomonas fluorescens (strain SBW25) GN=msrB PE=3 SV=1	4.77956	0	9.47789	4.86422
PputA514_0401	Non-canonical purine NTP pyrophosphatase OS=Pseudomonas putida (strain KT2440) GN=PP_5100 PE=3 SV=1	11.5568	10.0106	8.8709	4.8532
PputA514_4950	Ribulose-phosphate 3-epimerase OS=Shigella flexneri GN=rpe PE=3 SV=1	8.99499	4.03393	9.55414	4.84766
PputA514_4414	Protein PhnA OS=Shigella flexneri GN=phnA PE=4 SV=1	4.35879	0	0	4.84125
PputA514_4152	Protein TolQ OS=Pseudomonas aeruginosa (strain ATCC 15692 / PAO1 / 1C / PRS 101 / LMG 12228) GN=tolQ PE=3 SV=1	11.5964	8.81444	8.73347	4.82546
PputA514_5126	Leucine-responsive regulatory protein OS=Klebsiella pneumoniae GN=lrp PE=3 SV=3	8.26632	3.97521	9.48808	4.82412
PputA514_2910	-	4.41175	0	0	4.81821
PputA514_1859	hypothetical protein	11.3934	9.85361	11.3211	4.79799
PputA514_2560	Phosphoglucomutase OS=Escherichia coli (strain K12) GN=pgm PE=1 SV=1	4.38147	0	9.60292	4.78794
PputA514_2706	-	0	0	9.61283	4.78545
PputA514_1031	Integration host factor subunit beta OS=Pseudomonas fluorescens (strain SBW25) GN=ihfB PE=3 SV=1	11.483	5.47098	10.6536	4.77557
PputA514_3003	-	0	0	0	4.76127
PputA514_4540	-	10.6993	9.5337	0	4.761
PputA514_4861	Trans-aconitate 2-methyltransferase OS=Rhizobium loti (strain MAFF303099) GN=tam PE=3 SV=1	4.38856	4.15365	8.49902	4.75984
PputA514_4625	Triosephosphate isomerase OS=Pseudomonas fluorescens (strain Pf-5 / ATCC BAA-477) GN=tpiA PE=3 SV=1	10.1233	8.58344	7.1602	4.75812
PputA514_4408	Protein CreA OS=Shigella flexneri GN=creA PE=4 SV=1	0	0	4.72878	4.74201
PputA514_0014	ATP synthase subunit a OS=Pseudomonas fluorescens (strain SBW25) GN=atpB PE=3 SV=1	10.3847	0	9.11178	4.73263
PputA514_5158	GlcNAc-binding protein A OS=Shewanella oneidensis (strain MR-1) GN=gbpA PE=3 SV=2	10.7763	0	7.42444	4.72924
PputA514_0420	Protein PilH OS=Pseudomonas aeruginosa (strain ATCC 15692 / PAO1 / 1C / PRS 101 / LMG 12228) GN=pilH PE=3 SV=1	11.2315	10.3141	6.00643	4.72718
PputA514_0729	hypothetical protein	0	0	4.7968	4.69883
PputA514_1034	Cytidylate kinase OS=Pseudomonas fluorescens (strain SBW25) GN=cmk PE=3 SV=1	9.88138	8.58427	9.37753	4.67077
PputA514_0702	FK506-binding protein 1 OS=Debaryomyces hansenii (strain ATCC 36239 / CBS 767 / JCM 1990 / NBRC 0083 / IGC 2968) GN=FPR1 PE=3 SV=1	4.71334	4.88966	0	4.66648
PputA514_4644	Ribosome association toxin RatA OS=Pseudomonas aeruginosa (strain ATCC 15692 / PAO1 / 1C / PRS 101 / LMG 12228) GN=ratA PE=3 SV=1	4.1839	0	9.92326	4.65892
PputA514_6323	HTH-type transcriptional repressor KstR2 OS=Mycobacterium tuberculosis GN=kstR2 PE=1 SV=1	8.91267	3.77063	9.09925	4.64731
PputA514_0017	ATP synthase subunit delta OS=Pseudomonas fluorescens (strain SBW25) GN=atpH PE=3 SV=1	13.2823	11.7551	9.02453	4.64499
PputA514_3875	-	8.41357	3.96549	8.35425	4.63855
PputA514_6332	Uncharacterized protein YcbX OS=Escherichia coli (strain K12) GN=ycbX PE=1 SV=1	8.99353	8.54664	9.29541	4.63484
PputA514_2749	Cytochrome bo(3) ubiquinol oxidase subunit 2 OS=Pseudomonas putida GN=cyoA PE=3 SV=1	4.22647	0	10.1012	4.62548
PputA514_4222	Putative NAD(P)H nitroreductase YdjA OS=Escherichia coli (strain K12) GN=ydjA PE=1 SV=1	4.50514	7.81999	8.59293	4.61912
PputA514_1460	2-C-methyl-D-erythritol 2,4-cyclodiphosphate synthase OS=Pseudomonas fluorescens (strain SBW25) GN=ispF PE=3 SV=1	0	0	4.29086	4.60403
PputA514_6367	Flagellar protein FliL OS=Aquifex aeolicus (strain VF5) GN=fliL PE=3 SV=1	4.49349	0	0	4.60003
PputA514_1189	hypothetical protein	0	0	8.93801	4.59428
PputA514_4498	-	10.8286	0	4.6457	4.58292
PputA514_0953	Glutathione peroxidase 2 OS=Saccharomyces cerevisiae (strain ATCC 204508 / S288c) GN=GPX2 PE=1 SV=1	9.56774	4.27217	9.46182	4.57843
PputA514_4329	Putative HTH-type transcriptional regulator ORF2 OS=Azotobacter vinelandii PE=4 SV=1	9.71089	4.23549	4.10285	4.56952
PputA514_1338	XRE family transcriptional regulator	0	0	3.76049	4.56621
PputA514_4620	Ribosome-binding factor A OS=Pseudomonas fluorescens (strain SBW25) GN=rbfA PE=3 SV=1	10.0262	4.39313	10.6966	4.56621
PputA514_3206	Hydroxymethylglutaryl-CoA lyase, mitochondrial OS=Macaca fascicularis GN=HMGCL PE=2 SV=1	0	0	4.11104	4.56334
PputA514_1504	Uncharacterized lipoprotein YbaY OS=Escherichia coli (strain K12) GN=ybaY PE=4 SV=1	3.94874	0	5.2933	4.56273
PputA514_2094	Porin D OS=Pseudomonas aeruginosa (strain ATCC 15692 / PAO1 / 1C / PRS 101 / LMG 12228) GN=oprD PE=1 SV=1	0	5.05026	10.8423	4.55155
PputA514_5912	Uncharacterized MFS-type transporter YhjX OS=Escherichia coli (strain K12) GN=yhjX PE=1 SV=1	9.04205	9.9351	8.89566	4.55086
PputA514_5722	-	11.5305	9.73622	10.1124	4.54834
PputA514_4558	Shikimate dehydrogenase OS=Pseudomonas mendocina (strain ymp) GN=aroE PE=3 SV=1	9.24842	7.96751	0	4.54664
PputA514_0388	Ribosomal RNA small subunit methyltransferase D OS=Escherichia coli (strain K12) GN=rsmD PE=1 SV=1	8.99134	0	9.68745	4.53566
PputA514_4479	Uncharacterized protein bll6063 OS=Bradyrhizobium diazoefficiens (strain JCM 10833 / IAM 13628 / NBRC 14792 / USDA 110) GN=bll6063 PE=4 SV=2	0	4.00245	6.84635	4.53264
PputA514_1878	3-deoxy-D-manno-octulosonate 8-phosphate phosphatase KdsC OS=Yersinia pestis GN=kdsC PE=1 SV=1	8.66322	9.27301	9.84377	4.52986
PputA514_4587	-	9.77528	4.652	0	4.52868
PputA514_4421	Methyl-accepting chemotaxis protein McpS OS=Pseudomonas putida (strain KT2440) GN=mcpS PE=1 SV=1	8.60119	8.34651	5.81209	4.5155
PputA514_0398	tRNA (guanine-N(7)-)-methyltransferase OS=Pseudomonas fluorescens (strain SBW25) GN=trmB PE=3 SV=1	9.4082	8.89404	7.89482	4.51437
PputA514_3257	-	3.73912	8.06609	8.62256	4.49218
PputA514_1166	Regulator of RpoS OS=Shigella flexneri GN=rssB PE=3 SV=1	3.28887	6.8875	7.84168	4.48782
PputA514_0956	Protease HtpX OS=Pseudomonas fluorescens (strain SBW25) GN=htpX PE=3 SV=1	10.5832	10.2648	9.74409	4.48078
PputA514_5485	-	4.87166	0	5.07616	4.4782
PputA514_4324	Chaperone protein HscA homolog OS=Pseudomonas fluorescens (strain Pf0-1) GN=hscA PE=3 SV=1	0	0	0	4.46851
PputA514_0405	Uncharacterized protein PA0392 OS=Pseudomonas aeruginosa (strain ATCC 15692 / PAO1 / 1C / PRS 101 / LMG 12228) GN=PA0392 PE=3 SV=2	11.2275	10.2696	8.68541	4.44767
PputA514_4070	(R)-specific enoyl-CoA hydratase OS=Aeromonas caviae GN=phaJ PE=1 SV=1	4.12617	0	9.34636	4.44767
PputA514_4758	Ribosomal RNA large subunit methyltransferase H OS=Pseudomonas fluorescens (strain SBW25) GN=rlmH PE=3 SV=1	5.15268	5.06427	9.12782	4.44486
PputA514_4499	Homoserine kinase OS=Pseudomonas aeruginosa (strain UCBPP-PA14) GN=thrB PE=3 SV=1	7.29786	3.75568	8.78486	4.4362
PputA514_0787	carboxyl-terminal protease	9.3024	0	5.35504	4.43104
PputA514_2742	-	0	0	5.12532	4.43104
PputA514_3065	-	5.10791	0	0	4.42941
PputA514_6474	FMN-dependent NADH-azoreductase 2 OS=Pseudomonas fluorescens (strain Pf0-1) GN=azoR2 PE=3 SV=1	0	8.27963	0	4.42196
PputA514_2836	FMN-dependent NADH-azoreductase 3 OS=Pseudomonas fluorescens (strain Pf0-1) GN=azoR3 PE=3 SV=1	0	0	0	4.41867
PputA514_3102	-	3.50807	0	4.3089	4.41453
PputA514_1921	Ubiquinol-cytochrome c reductase iron-sulfur subunit OS=Allochromatium vinosum (strain ATCC 17899 / DSM 180 / NBRC 103801 / D) GN=petA PE=3 SV=2	11.0068	9.35895	4.34822	4.41122
PputA514_5843	Uncharacterized protein YigP OS=Shigella flexneri GN=yigP PE=4 SV=1	11.2935	8.4727	8.4383	4.40459
PputA514_1561	Nicotinamide-nucleotide amidohydrolase PncC OS=Pseudomonas putida GN=pncC PE=3 SV=1	0	4.22234	3.88217	4.40286
PputA514_3185	Uncharacterized HIT-like protein MJ0866 OS=Methanocaldococcus jannaschii (strain ATCC 43067 / DSM 2661 / JAL-1 / JCM 10045 / NBRC 100440) GN=MJ0866 PE=4 SV=2	0	0	0	4.39107
PputA514_1572	-	0	0	0	4.38568
PputA514_0621	Isoquinoline 1-oxidoreductase subunit beta OS=Brevundimonas diminuta GN=iorB PE=1 SV=1	0	8.44659	3.57675	4.38249
PputA514_4311	UPF0070 protein YfgM OS=Escherichia coli (strain K12) GN=yfgM PE=3 SV=1	11.6396	9.61276	10.0083	4.37654
PputA514_4496	Probable GTP-binding protein EngB OS=Pseudomonas fluorescens (strain SBW25) GN=engB PE=3 SV=1	9.82491	9.91849	8.80074	4.37654
PputA514_5079	Rhamnosyltransferase 1 subunit A OS=Pseudomonas aeruginosa (strain ATCC 15692 / PAO1 / 1C / PRS 101 / LMG 12228) GN=rhlA PE=2 SV=2	4.03487	0	8.62914	4.35649
PputA514_6206	-	9.32581	0	7.75324	4.35116
PputA514_2479	Biofilm dispersion protein BdlA OS=Pseudomonas aeruginosa (strain ATCC 15692 / PAO1 / 1C / PRS 101 / LMG 12228) GN=bdlA PE=1 SV=1	4.09674	8.35737	0	4.3498
PputA514_1918	Stringent starvation protein A OS=Shigella flexneri GN=sspA PE=3 SV=2	8.61967	8.48354	8.17151	4.34713
PputA514_5694	Ribonuclease R OS=Escherichia coli (strain K12) GN=rnr PE=1 SV=2	0	4.69976	0	4.34505
PputA514_5970	-	9.2154	0	9.31701	4.34505
PputA514_4913	dTDP-4-dehydrorhamnose reductase OS=Salmonella typhimurium (strain LT2 / SGSC1412 / ATCC 700720) GN=rfbD PE=1 SV=1	0	0	0	4.34444
PputA514_3810	Probable lipoprotein YiaD OS=Escherichia coli (strain K12) GN=yiaD PE=1 SV=2	9.3387	0	3.73612	4.34178
PputA514_2761	50S ribosomal protein L3 glutamine methyltransferase OS=Xanthomonas campestris pv. campestris (strain ATCC 33913 / NCPPB 528 / LMG 568) GN=prmB PE=3 SV=1	0	0	4.15642	4.33807
PputA514_3545	Putative lipoprotein NMB1126/NMB1164 OS=Neisseria meningitidis serogroup B (strain MC58) GN=NMB1126 PE=1 SV=1	3.85877	4.02753	7.01913	4.3338
PputA514_6444	Uncharacterized protein YaiL OS=Escherichia coli (strain K12) GN=yaiL PE=4 SV=2	9.59497	3.89522	8.90409	4.33301
PputA514_2272	arsenical resistance protein ArsH	3.55994	0	3.9381	4.32744
PputA514_3639	Testis-expressed sequence 30 protein OS=Homo sapiens GN=TEX30 PE=2 SV=1	8.66436	9.53143	8.07876	4.32113
PputA514_4536	-	0	0	3.71259	4.31822
PputA514_1019	UDP-glucose 4-epimerase OS=Vibrio cholerae GN=galE PE=3 SV=1	8.94436	3.71615	4.00918	4.3149
PputA514_2176	4-hydroxy-tetrahydrodipicolinate synthase 2 OS=Clostridium acetobutylicum (strain ATCC 824 / DSM 792 / JCM 1419 / LMG 5710 / VKM B-1787) GN=dapA2 PE=3 SV=1	10.378	9.34757	9.01656	4.31053
PputA514_6347	Chemotaxis response regulator protein-glutamate methylesterase of group 1 operon OS=Pseudomonas putida (strain KT2440) GN=cheB1 PE=3 SV=1	8.80549	9.82234	7.68836	4.30562
PputA514_0131	hypothetical protein	10.0972	0	9.56005	4.29789
PputA514_3392	-	10.2188	0	0	4.29289
PputA514_1954	Peptide chain release factor 3 OS=Pseudomonas fluorescens (strain SBW25) GN=prfC PE=3 SV=1	7.44193	8.46678	6.95858	4.2918
PputA514_1575	Tail protein I OS=Enterobacteria phage P2 GN=I PE=4 SV=1	0	0	0	4.28445
PputA514_1167	type IV pilus assembly PilZ	10.2374	0	5.37353	4.28303
PputA514_4811	Geranylgeranyl pyrophosphate synthase, chloroplastic OS=Capsicum annuum GN=GGPS1 PE=3 SV=1	3.8741	8.2189	3.46744	4.28057
PputA514_1576	Baseplate assembly protein J OS=Enterobacteria phage P2 GN=J PE=4 SV=1	0	0	0	4.27557
PputA514_6448	Cysteine synthase B OS=Pseudomonas aeruginosa (strain ATCC 15692 / PAO1 / 1C / PRS 101 / LMG 12228) GN=cysM PE=3 SV=1	7.87737	7.53368	7.69542	4.26845
PputA514_0174	Deoxyuridine 5'-triphosphate nucleotidohydrolase OS=Pseudomonas fluorescens (strain SBW25) GN=dut PE=3 SV=1	9.32122	10.1091	9.60089	4.26366
PputA514_1820	Protein MraZ OS=Pseudomonas fluorescens (strain SBW25) GN=mraZ PE=3 SV=1	0	3.99817	0	4.26366
PputA514_3432	Uncharacterized protein YiiD OS=Escherichia coli (strain K12) GN=yiiD PE=4 SV=1	0	0	9.10089	4.26366
PputA514_2288	Probable nitronate monooxygenase OS=Staphylococcus saprophyticus subsp. saprophyticus (strain ATCC 15305 / DSM 20229) GN=SSP1854 PE=3 SV=1	0	0	3.70436	4.26025
PputA514_1496	Probable cysteine desulfurase OS=Pseudomonas putida (strain KT2440) GN=csdA PE=3 SV=1	3.15262	4.22509	7.2768	4.25919
PputA514_3068	NAD(P)H dehydrogenase (quinone) OS=Pseudomonas aeruginosa (strain ATCC 15692 / PAO1 / 1C / PRS 101 / LMG 12228) GN=PA0949 PE=1 SV=1	4.43265	0	0	4.25415
PputA514_6372	-	0	0	5.03307	4.25382
PputA514_2755	Protein YciE OS=Escherichia coli (strain K12) GN=yciE PE=1 SV=1	10.7357	8.80706	10.8838	4.25144
PputA514_0565	Uncharacterized protein YcaC OS=Escherichia coli (strain K12) GN=ycaC PE=1 SV=1	0	5.59788	3.43746	4.25064
PputA514_2990	Bacilysin biosynthesis oxidoreductase BacC OS=Bacillus subtilis (strain 168) GN=bacC PE=3 SV=2	3.97922	7.56062	7.79841	4.24671
PputA514_3523	5-aminovalerate aminotransferase DavT OS=Pseudomonas putida (strain KT2440) GN=davT PE=1 SV=1	4.13081	4.00707	0	4.24478
PputA514_6365	Flagellar motor switch protein FliN OS=Pseudomonas aeruginosa (strain ATCC 15692 / PAO1 / 1C / PRS 101 / LMG 12228) GN=fliN PE=3 SV=2	9.99102	10.2161	4.54283	4.24478
PputA514_2248	4-hydroxyproline epimerase OS=Pseudomonas aeruginosa (strain ATCC 15692 / PAO1 / 1C / PRS 101 / LMG 12228) GN=PA1268 PE=1 SV=1	0	0	0	4.24201
PputA514_4678	Ferredoxin--NADP reductase OS=Shigella flexneri GN=fpr PE=3 SV=3	0	0	4.43256	4.23827
PputA514_1263	HTH-type transcriptional activator NagR OS=Ralstonia sp. GN=nagR PE=4 SV=1	0	3.97698	7.35098	4.23502
PputA514_3055	Putative biopolymer transport protein ExbB homolog OS=Methanothermobacter thermautotrophicus (strain ATCC 29096 / DSM 1053 / JCM 10044 / NBRC 100330 / Delta H) GN=MTH_1022 PE=3 SV=1	8.67756	3.75682	7.70314	4.22982
PputA514_6061	-	10.108	5.28118	5.31693	4.22641
PputA514_4761	Gamma-glutamyl phosphate reductase OS=Pseudomonas fluorescens (strain SBW25) GN=proA PE=3 SV=1	8.26594	7.86676	7.52529	4.22408
PputA514_4030	-	4.8245	9.54369	0	4.22352
PputA514_4326	Iron-binding protein IscA OS=Serratia proteamaculans (strain 568) GN=iscA PE=3 SV=1	9.15718	0	0	4.21219
PputA514_3808	-	9.56774	8.88505	4.27271	4.20994
PputA514_4940	2-nonaprenyl-3-methyl-6-methoxy-1,4-benzoquinol hydroxylase OS=Pseudomonas fluorescens (strain SBW25) GN=coq7 PE=3 SV=1	8.58769	7.51433	8.83703	4.20882
PputA514_0685	2,5-diketo-D-gluconic acid reductase B OS=Yersinia pestis GN=dkgB PE=3 SV=1	8.47214	8.76	8.25184	4.2076
PputA514_5393	-	10.9701	4.62733	9.43518	4.20408
PputA514_4086	-	4.33105	0	0	4.20232
PputA514_3384	-	0	0	0	4.1979
PputA514_6445	Nucleoside triphosphate pyrophosphohydrolase OS=Escherichia coli (strain K12) GN=mazG PE=1 SV=1	9.22215	0	0	4.19446
PputA514_0348	Ribose-5-phosphate isomerase A OS=Pseudomonas fluorescens (strain SBW25) GN=rpiA PE=3 SV=1	9.0512	5.09491	0	4.18993
PputA514_4786	Adenosine monophosphate-protein transferase SoFic OS=Shewanella oneidensis (strain MR-1) GN=SO_4266 PE=1 SV=1	7.92728	8.08364	3.37457	4.18789
PputA514_0943	hypothetical protein	5.01218	4.23504	8.97257	4.17284
PputA514_4321	2Fe-2S ferredoxin OS=Haemophilus influenzae (strain ATCC 51907 / DSM 11121 / KW20 / Rd) GN=fdx PE=3 SV=2	5.29601	5.32001	9.89656	4.17284
PputA514_0377	Ribosomal RNA large subunit methyltransferase I OS=Vibrio cholerae serotype O1 (strain ATCC 39315 / El Tor Inaba N16961) GN=rlmI PE=3 SV=2	0	0	3.24376	4.1683
PputA514_1304	Uracil-DNA glycosylase OS=Pseudomonas fluorescens (strain SBW25) GN=ung PE=3 SV=1	3.84612	7.91702	7.78628	4.16763
PputA514_1523	hypothetical protein	9.06576	4.52117	9.41008	4.16649
PputA514_0463	Disulfide-bond oxidoreductase YfcG OS=Escherichia coli (strain K12) GN=yfcG PE=1 SV=1	4.63236	4.00863	8.78866	4.16139
PputA514_3512	Uncharacterized endoplasmic reticulum membrane protein YGL010W OS=Saccharomyces cerevisiae (strain ATCC 204508 / S288c) GN=YGL010W PE=1 SV=2	0	0	8.97305	4.15726
PputA514_3737	Cyclic-di-GMP-binding biofilm dispersal mediator protein OS=Escherichia coli (strain K12) GN=bdcA PE=1 SV=2	0	0	3.62534	4.146
PputA514_4262	Ribosome maturation factor RimM OS=Pseudomonas fluorescens (strain SBW25) GN=rimM PE=3 SV=1	0	8.74022	3.83181	4.14499
PputA514_6203	Chemotaxis protein CheY OS=Bacillus subtilis (strain 168) GN=cheY PE=1 SV=3	0	4.16997	0	4.14296
PputA514_0337	hypothetical protein	3.74259	0	3.54341	4.14161
PputA514_3991	Protein CicA OS=Caulobacter crescentus (strain ATCC 19089 / CB15) GN=cicA PE=4 SV=1	5.26478	9.17234	0	4.14161
PputA514_0383	hypothetical protein	8.69127	9.42364	9.03561	4.13292
PputA514_1494	Protein YffB OS=Escherichia coli (strain K12) GN=yffB PE=1 SV=1	11.2639	0	9.82308	4.12947
PputA514_3657	Adenine phosphoribosyltransferase OS=Pseudomonas fluorescens (strain SBW25) GN=apt PE=3 SV=1	8.39085	4.15596	8.41648	4.12895
PputA514_0869	Succinate dehydrogenase hydrophobic membrane anchor subunit OS=Coxiella burnetii (strain RSA 493 / Nine Mile phase I) GN=sdhD PE=1 SV=2	4.45689	5.31296	0	4.12501
PputA514_4805	Uncharacterized protein YjfI OS=Escherichia coli (strain K12) GN=yjfI PE=4 SV=1	4.67198	0	0	4.12501
PputA514_3917	Lon protease homolog 2, peroxisomal OS=Yarrowia lipolytica (strain CLIB 122 / E 150) GN=YALI0F23595g PE=3 SV=1	6.89478	4.02642	7.71293	4.12349
PputA514_0295	Protein QmcA OS=Shigella flexneri GN=qmcA PE=3 SV=1	3.50107	0	3.1485	4.12263
PputA514_4401	D-erythro-7,8-dihydroneopterin triphosphate epimerase OS=Shigella flexneri GN=folX PE=3 SV=2	9.24862	9.98096	4.70963	4.11911
PputA514_4422	-	0	0	3.81183	4.11755
PputA514_4960	-	0	0	4.17248	4.10971
PputA514_1984	1,6-anhydro-N-acetylmuramyl-L-alanine amidase AmpD OS=Haemophilus influenzae (strain ATCC 51907 / DSM 11121 / KW20 / Rd) GN=ampD PE=3 SV=1	4.14882	0	0	4.10941
PputA514_1916	HTH-type transcriptional regulator LutR OS=Bacillus subtilis (strain 168) GN=lutR PE=1 SV=1	9.16836	7.96348	8.72951	4.10292
PputA514_2944	Probable amino-acid ABC transporter periplasmic-binding protein y4oP OS=Rhizobium sp. (strain NGR234) GN=NGR_a02200 PE=3 SV=1	3.37657	3.51754	7.6396	4.10172
PputA514_5692	23S rRNA (guanosine-2'-O-)-methyltransferase RlmB OS=Pseudomonas syringae pv. tomato (strain DC3000) GN=rlmB PE=3 SV=1	0	0	9.38995	4.09716
PputA514_5530	Beta-lactamase OS=Pseudomonas fluorescens GN=ampC PE=1 SV=1	7.39348	3.24633	0	4.09521
PputA514_1287	Sigma factor AlgU regulatory protein MucB OS=Pseudomonas aeruginosa (strain ATCC 15692 / PAO1 / 1C / PRS 101 / LMG 12228) GN=mucB PE=1 SV=1	3.8177	0	8.71804	4.09264
PputA514_4920	Uncharacterized protein Mb1547 OS=Mycobacterium bovis (strain ATCC BAA-935 / AF2122/97) GN=Mb1547 PE=4 SV=1	7.87373	9.34879	8.21806	4.08519
PputA514_0715	Gamma-glutamylputrescine synthetase PuuA OS=Escherichia coli (strain K12) GN=puuA PE=1 SV=2	3.2261	6.9551	7.98537	4.08293
PputA514_3677	Xanthine dehydrogenase OS=Emericella nidulans (strain FGSC A4 / ATCC 38163 / CBS 112.46 / NRRL 194 / M139) GN=hxA PE=2 SV=2	0	0	6.54309	4.08104
PputA514_5478	GDP-mannose pyrophosphatase NudK OS=Serratia proteamaculans (strain 568) GN=nudK PE=3 SV=1	9.45229	9.35134	8.02446	4.07918
PputA514_4680	Ribosomal RNA large subunit methyltransferase G OS=Pseudomonas fluorescens (strain Pf0-1) GN=rlmG PE=3 SV=1	3.47079	3.31925	7.32805	4.07731
PputA514_2054	Peptidyl-tRNA hydrolase OS=Pseudomonas fluorescens (strain Pf0-1) GN=pth PE=3 SV=1	9.5709	7.95507	9.4691	4.07546
PputA514_3836	Uncharacterized deoxyribonuclease YcfH OS=Escherichia coli (strain K12) GN=ycfH PE=1 SV=1	7.07832	4.13119	4.05575	4.06898
PputA514_5104	Protein YqjC OS=Escherichia coli (strain K12) GN=yqjC PE=1 SV=3	8.86524	4.12843	9.03559	4.06621
PputA514_5536	Succinate--hydroxymethylglutarate CoA-transferase OS=Homo sapiens GN=SUGCT PE=1 SV=2	0	0	3.62168	4.0589
PputA514_0195	Cytochrome c5 OS=Pseudomonas mendocina PE=1 SV=1	8.54877	4.46094	7.40066	4.05799
PputA514_2111	hypothetical protein	9.78601	0	8.85818	4.04988
PputA514_6232	-	7.62507	0	4.03664	4.04988
PputA514_5535	Citrate lyase subunit beta-like protein OS=Mycobacterium tuberculosis GN=citE PE=1 SV=1	0	0	3.89711	4.04931
PputA514_0273	Flagellar protein FliL OS=Aquifex aeolicus (strain VF5) GN=fliL PE=3 SV=1	10.6721	10.2707	4.2388	4.04453
PputA514_4155	Holliday junction ATP-dependent DNA helicase RuvA OS=Pseudomonas fluorescens (strain SBW25) GN=ruvA PE=3 SV=1	0	0	7.96642	4.04275
PputA514_3533	-	4.42737	0	4.30555	4.04137
PputA514_3703	Uncharacterized protein YgxB OS=Bacillus subtilis (strain 168) GN=ygxB PE=4 SV=2	9.5931	0	0	4.04137
PputA514_0286	2-octaprenylphenol hydroxylase OS=Escherichia coli (strain K12) GN=ubiI PE=1 SV=2	3.80292	3.31073	3.60375	4.04097
PputA514_2539	Lipase OS=Pseudomonas fluorescens PE=3 SV=1	0	0	0	4.03918
PputA514_2046	Release factor glutamine methyltransferase OS=Pseudomonas aeruginosa (strain ATCC 15692 / PAO1 / 1C / PRS 101 / LMG 12228) GN=prmC PE=3 SV=1	0	0	0	4.03611
PputA514_5420	Uncharacterized ABC transporter ATP-binding protein YejF OS=Escherichia coli (strain K12) GN=yejF PE=3 SV=1	0	0	0	4.03568
PputA514_1950	Dipeptide transport ATP-binding protein DppD OS=Shigella flexneri GN=dppD PE=3 SV=1	7.50816	10.4846	7.82623	4.03391
PputA514_6187	Glyoxalase domain-containing protein 5 OS=Xenopus laevis GN=glod5 PE=2 SV=2	9.88558	4.56835	9.1187	4.03391
PputA514_0426	CheW domain-containing protein	4.71461	0	4.30029	4.02867
PputA514_1365	Probable HTH-type transcriptional regulator TtgR OS=Pseudomonas putida (strain KT2440) GN=ttgR PE=3 SV=1	3.61925	0	8.87097	4.02574
PputA514_5467	Transketolase OS=Bacillus halodurans (strain ATCC BAA-125 / DSM 18197 / FERM 7344 / JCM 9153 / C-125) GN=tkt PE=3 SV=1	0	0	8.38085	4.02034
PputA514_5003	Biotin synthase OS=Pseudomonas fluorescens (strain Pf0-1) GN=bioB PE=3 SV=1	9.55452	0	0	4.01622
PputA514_0210	UPF0047 protein YjbQ OS=Escherichia coli (strain K12) GN=yjbQ PE=3 SV=1	0	0	8.49224	4.01315
PputA514_4699	-	0	0	8.78471	4.01315
PputA514_4760	Probable nicotinate-nucleotide adenylyltransferase OS=Pseudomonas fluorescens (strain Pf-5 / ATCC BAA-477) GN=nadD PE=3 SV=1	0	0	7.8903	4.01213
PputA514_5718	Phosphatidylserine decarboxylase proenzyme OS=Pseudomonas fluorescens (strain SBW25) GN=psd PE=3 SV=1	8.32376	9.55608	9.21784	4.01043
PputA514_3054	Biopolymer transport protein exbD2 OS=Vibrio cholerae serotype O1 (strain ATCC 39315 / El Tor Inaba N16961) GN=exbD2 PE=3 SV=1	3.90152	0	3.98721	4.00804
PputA514_0193	Alanine racemase OS=Pseudomonas fluorescens (strain Pf-5 / ATCC BAA-477) GN=alr PE=3 SV=1	3.38989	0	4.03731	4.00399
PputA514_0957	Thiopurine S-methyltransferase OS=Pseudomonas fluorescens (strain SBW25) GN=tpm PE=3 SV=1	0	0	8.23206	3.99876
PputA514_0732	Succinyl-CoA:3-ketoacid coenzyme A transferase subunit B OS=Xanthomonas campestris pv. campestris (strain B100) GN=lpsJ PE=3 SV=1	0	0	7.5645	3.99545
PputA514_3676	Uncharacterized HTH-type transcriptional regulator YdfH OS=Shigella flexneri GN=ydfH PE=4 SV=1	8.49234	0	8.87187	3.99545
PputA514_5050	Probable N-methylproline demethylase OS=Rhizobium meliloti (strain 1021) GN=stcD PE=2 SV=2	0	0	0	3.98801
PputA514_5754	Uncharacterized protein sll1178 OS=Synechocystis sp. (strain PCC 6803 / Kazusa) GN=sll1178 PE=3 SV=1	6.70638	9.44766	9.23447	3.98678
PputA514_5586	Uncharacterized oxidoreductase sll0816 OS=Synechocystis sp. (strain PCC 6803 / Kazusa) GN=sll0816 PE=3 SV=1	3.20876	0	6.59647	3.9837
PputA514_3975	-	3.2107	3.87944	3.79638	3.9782
PputA514_0793	Uncharacterized protein y4iJ OS=Rhizobium sp. (strain NGR234) GN=NGR_a03230 PE=4 SV=1	3.51858	0	6.53199	3.97173
PputA514_1763	Peptidoglycan-N-acetylmuramic acid deacetylase PdaC OS=Bacillus subtilis (strain 168) GN=pdaC PE=1 SV=1	0	0	0	3.97044
PputA514_2198	-	0	0	8.69544	3.96853
PputA514_4500	High-affinity zinc uptake system protein ZnuA OS=Escherichia coli (strain K12) GN=znuA PE=1 SV=4	3.50107	3.4887	3.72585	3.96169
PputA514_1427	Beta-lactamase domain-containing protein 2 OS=Caenorhabditis elegans GN=lact-2 PE=4 SV=1	3.1896	8.27383	6.92659	3.95707
PputA514_5763	Lipopolysaccharide core biosynthesis protein RfaG OS=Escherichia coli (strain K12) GN=rfaG PE=1 SV=1	3.1896	4.12304	7.05809	3.95707
PputA514_1516	extensin family protein	0	0	0	3.95387
PputA514_1891	Fumarate hydratase class II 1 OS=Pseudomonas aeruginosa (strain ATCC 15692 / PAO1 / 1C / PRS 101 / LMG 12228) GN=fumC1 PE=3 SV=1	0	0	6.28308	3.9511
PputA514_1417	hypothetical protein	0	4.01174	0	3.94953
PputA514_3471	Serine acetyltransferase, plasmid OS=Synechococcus elongatus (strain PCC 7942) GN=srpH PE=3 SV=1	8.00035	8.15668	8.57251	3.94953
PputA514_1178	Lipoprotein-releasing system ATP-binding protein LolD OS=Pseudomonas fluorescens (strain Pf-5 / ATCC BAA-477) GN=lolD PE=3 SV=2	9.20163	8.96916	7.98134	3.94641
PputA514_4559	Coproporphyrinogen-III oxidase, aerobic OS=Pseudomonas fluorescens (strain SBW25) GN=hemF PE=3 SV=1	4.13081	4.41076	0	3.94486
PputA514_2115	hypothetical protein	9.21831	8.33943	3.33897	3.94458
PputA514_4435	Leucine-responsive regulatory protein OS=Rhizobium meliloti (strain 1021) GN=lrp PE=3 SV=1	0	0	0	3.94306
PputA514_4293	Trehalose operon transcriptional repressor OS=Bacillus subtilis (strain 168) GN=treR PE=1 SV=2	8.55772	4.61364	4.13452	3.94022
PputA514_2525	Uncharacterized protein sll0335 OS=Synechocystis sp. (strain PCC 6803 / Kazusa) GN=sll0335 PE=4 SV=1	0	0	4.07021	3.93869
PputA514_3803	Uncharacterized protein sll0335 OS=Synechocystis sp. (strain PCC 6803 / Kazusa) GN=sll0335 PE=4 SV=1	0	0	3.91784	3.93869
PputA514_1971	Uncharacterized HTH-type transcriptional regulator HI_1364 OS=Haemophilus influenzae (strain ATCC 51907 / DSM 11121 / KW20 / Rd) GN=HI_1364 PE=4 SV=1	0	0	3.42469	3.93792
PputA514_3853	Ribosomal large subunit pseudouridine synthase C OS=Pseudomonas aeruginosa (strain ATCC 15692 / PAO1 / 1C / PRS 101 / LMG 12228) GN=rluC PE=3 SV=1	0	0	3.91098	3.93166
PputA514_6155	HTH-type transcriptional regulator LutR OS=Bacillus subtilis (strain 168) GN=lutR PE=1 SV=1	0	7.66625	7.743	3.93104
PputA514_0517	O antigen biosynthesis rhamnosyltransferase RfbN OS=Salmonella typhimurium (strain LT2 / SGSC1412 / ATCC 700720) GN=rfbN PE=3 SV=1	0	3.62297	3.96252	3.92921
PputA514_0315	Gamma aminobutyrate transaminase 2 OS=Solanum lycopersicum GN=GABA-TP2 PE=1 SV=1	3.97486	8.66018	7.23695	3.92799
PputA514_4413	Octaprenyl-diphosphate synthase OS=Shigella flexneri GN=ispB PE=3 SV=1	9.55638	8.38505	4.19672	3.92491
PputA514_2621	HTH-type transcriptional regulator GalR OS=Pseudomonas putida (strain KT2440) GN=galR PE=4 SV=1	3.15444	3.95641	8.63063	3.92196
PputA514_4501	Zinc uptake regulation protein OS=Shigella flexneri GN=zur PE=3 SV=1	0	0	8.10232	3.92196
PputA514_5342	5-dehydro-2-deoxygluconokinase 1 OS=Bacillus cereus (strain ZK / E33L) GN=iolC1 PE=3 SV=1	0	3.9508	7.49478	3.91635
PputA514_5340	5-deoxy-glucuronate isomerase OS=Geobacillus kaustophilus (strain HTA426) GN=iolB PE=3 SV=1	0	0	7.82408	3.91597
PputA514_3107	NADH-quinone oxidoreductase subunit E OS=Pseudomonas aeruginosa (strain ATCC 15692 / PAO1 / 1C / PRS 101 / LMG 12228) GN=nuoE PE=3 SV=1	8.82482	9.05715	0	3.90721
PputA514_4333	Uncharacterized protein YcfJ OS=Shigella flexneri GN=ycfJ PE=4 SV=1	9.32482	0	4.25503	3.90721
PputA514_2134	hypothetical protein	8.04111	8.80864	9.47038	3.90416
PputA514_4964	4-hydroxythreonine-4-phosphate dehydrogenase OS=Pseudomonas putida (strain KT2440) GN=pdxA PE=3 SV=1	7.69769	3.75667	3.38111	3.90194
PputA514_3476	Uncharacterized amino-acid ABC transporter ATP-binding protein YecC OS=Escherichia coli (strain K12) GN=yecC PE=3 SV=2	3.65267	4.16805	4.5926	3.89831
PputA514_3158	-	9.77378	9.25018	9.11943	3.89251
PputA514_0114	Phosphate-specific transport system accessory protein PhoU homolog OS=Pseudomonas putida GN=phoU PE=3 SV=1	7.70813	0	3.57822	3.89137
PputA514_1443	Probable DNA ligase OS=Opitutus terrae (strain DSM 11246 / PB90-1) GN=lig PE=3 SV=1	0	0	8.26295	3.89107
PputA514_3119	N-hydroxyarylamine O-acetyltransferase OS=Escherichia coli (strain K12) GN=nhoA PE=3 SV=1	8.45082	3.92121	3.28856	3.88677
PputA514_2320	Uncharacterized N-acetyltransferase YhhY OS=Escherichia coli (strain K12) GN=yhhY PE=3 SV=1	4.67537	0	4.07251	3.88568
PputA514_0116	UPF0053 protein YhdP OS=Bacillus subtilis (strain 168) GN=yhdP PE=3 SV=1	3.55994	0	7.71392	3.88144
PputA514_6375	Flagellar assembly protein FliH OS=Escherichia coli (strain K12) GN=fliH PE=3 SV=3	4.27169	7.26816	0	3.87824
PputA514_1319	hypothetical protein	0	0	0	3.86891
PputA514_5730	3',5'-cyclic adenosine monophosphate phosphodiesterase CpdA OS=Pseudomonas aeruginosa GN=cpdA PE=1 SV=1	0	0	3.84475	3.86563
PputA514_1475	Acyl-[acyl-carrier-protein]--UDP-N-acetylglucosamine O-acyltransferase OS=Pseudomonas fluorescens (strain SBW25) GN=lpxA PE=3 SV=1	3.46519	0	3.55854	3.86423
PputA514_3647	Cbb3-type cytochrome c oxidase subunit CcoP2 OS=Pseudomonas stutzeri GN=ccoP2 PE=1 SV=1	10.4057	9.39215	8.54493	3.8627
PputA514_3926	-	0	0	8.08193	3.85795
PputA514_4732	Hydroxymethylpyrimidine/phosphomethylpyrimidine kinase OS=Staphylococcus aureus (strain N315) GN=thiD PE=1 SV=1	4.45146	4.4127	3.75227	3.85795
PputA514_0106	Putative glucose-6-phosphate 1-epimerase OS=Escherichia coli (strain K12) GN=yeaD PE=1 SV=2	0	0	0	3.85733
PputA514_6108	Blue-light-activated histidine kinase OS=Brucella ovis (strain ATCC 25840 / 63/290 / NCTC 10512) GN=BOV_A0554 PE=3 SV=2	0	0	3.84409	3.85733
PputA514_5051	-	0	0	0	3.8532
PputA514_4573	D-glycero-beta-D-manno-heptose-1,7-bisphosphate 7-phosphatase OS=Pseudomonas aeruginosa (strain ATCC 15692 / PAO1 / 1C / PRS 101 / LMG 12228) GN=gmhB PE=3 SV=1	0	0	4.20031	3.85251
PputA514_2117	Uncharacterized protein YebT OS=Escherichia coli (strain K12) GN=yebT PE=3 SV=2	0	7.57837	7.23112	3.85202
PputA514_5385	Methionine synthase OS=Pseudomonas aeruginosa (strain ATCC 15692 / PAO1 / 1C / PRS 101 / LMG 12228) GN=metH PE=3 SV=1	6.12484	7.34585	7.2354	3.8497
PputA514_2975	Aldehyde reductase YahK OS=Escherichia coli (strain K12) GN=yahK PE=1 SV=1	7.79545	3.40932	8.32108	3.84709
PputA514_3228	-	0	0	0	3.84444
PputA514_3490	Multidrug resistance protein MdtA OS=Dickeya dadantii (strain Ech586) GN=mdtA PE=3 SV=1	0	0	0	3.84444
PputA514_5762	Lipopolysaccharide core heptose(I) kinase RfaP OS=Pseudomonas aeruginosa (strain ATCC 15692 / PAO1 / 1C / PRS 101 / LMG 12228) GN=rfaP PE=1 SV=1	4.84702	8.14986	7.06569	3.84237
PputA514_4006	Biofilm dispersion protein BdlA OS=Pseudomonas aeruginosa (strain ATCC 15692 / PAO1 / 1C / PRS 101 / LMG 12228) GN=bdlA PE=1 SV=1	7.57846	0	3.36715	3.84125
PputA514_1876	Uncharacterized ABC transporter ATP-binding protein HI_1087 OS=Haemophilus influenzae (strain ATCC 51907 / DSM 11121 / KW20 / Rd) GN=HI_1087 PE=1 SV=1	3.44065	3.60939	3.53396	3.83967
PputA514_0830	Putative aminoacrylate hydrolase RutD OS=Methylobacterium extorquens (strain CM4 / NCIMB 13688) GN=rutD PE=3 SV=1	4.23045	0	7.05494	3.83699
PputA514_4780	Ethanolamine ammonia-lyase light chain OS=Pseudomonas fluorescens (strain SBW25) GN=eutC PE=3 SV=1	7.91709	4.09876	7.97627	3.83646
PputA514_5889	Nitrogen regulation protein NtrB OS=Vibrio alginolyticus GN=ntrB PE=3 SV=1	6.90281	8.42762	3.32178	3.83501
PputA514_0872	Cation/acetate symporter ActP OS=Yersinia enterocolitica serotype O:8 / biotype 1B (strain NCTC 13174 / 8081) GN=actP PE=3 SV=1	2.92212	0	9.29541	3.82861
PputA514_5157	Uncharacterized protein YecA OS=Shigella flexneri GN=yecA PE=4 SV=1	9.16758	4.51655	7.90069	3.82861
PputA514_5868	Glycine betaine transport ATP-binding protein OpuAA OS=Bacillus subtilis (strain 168) GN=opuAA PE=1 SV=3	0	7.16449	4.2282	3.82639
PputA514_1983	signaling modulator of AmpD, AmpE	8.07219	0	4.21775	3.82337
PputA514_0523	Protein RfbU OS=Salmonella typhimurium (strain LT2 / SGSC1412 / ATCC 700720) GN=rfbU PE=3 SV=1	7.7475	3.35753	8.57355	3.82312
PputA514_0215	Diaminopimelate epimerase OS=Pseudomonas syringae pv. phaseolicola (strain 1448A / Race 6) GN=dapF PE=1 SV=1	0	7.73894	7.92693	3.82113
PputA514_2606	Metapyrocatechase 2 OS=Cupriavidus necator GN=mcpII PE=3 SV=1	0	0	3.20741	3.81307
PputA514_5911	-	0	10.4697	10.2987	3.81307
PputA514_5212	ECF RNA polymerase sigma factor SigK OS=Mycobacterium vanbaalenii (strain DSM 7251 / PYR-1) GN=sigK PE=3 SV=1	0	0	0	3.80949
PputA514_1895	Nitrilase homolog 1 OS=Homo sapiens GN=NIT1 PE=1 SV=2	3.40663	0	0	3.80562
PputA514_5033	Formyltetrahydrofolate deformylase OS=Corynebacterium sp. (strain P-1) GN=purU PE=3 SV=1	0	0	6.97697	3.80544
PputA514_5166	Uncharacterized protein YkwD OS=Bacillus subtilis (strain 168) GN=ykwD PE=4 SV=1	8.75401	0	3.78223	3.80307
PputA514_1336	Probable alcohol dehydrogenase OS=Escherichia coli (strain K12) GN=yiaY PE=3 SV=4	10.379	10.016	0	3.80166
PputA514_1568	-	0	0	0	3.79798
PputA514_0030	UPF0192 protein YPO2573/y1143/YP_1141 OS=Yersinia pestis GN=YPO2573 PE=3 SV=1	3.83731	4.14515	8.57626	3.79045
PputA514_2289	Uncharacterized hydrolase YNR064C OS=Saccharomyces cerevisiae (strain ATCC 204508 / S288c) GN=YNR064C PE=3 SV=1	0	0	3.47477	3.78796
PputA514_0067	Pyridoxamine kinase OS=Pseudomonas fluorescens (strain SBW25) GN=pdxY PE=3 SV=1	0	0	3.47214	3.78546
PputA514_5195	Maltose/maltodextrin import ATP-binding protein MalK OS=Yersinia pseudotuberculosis serotype I (strain IP32953) GN=malK PE=3 SV=1	0	0	3.26973	3.78295
PputA514_4126	Transcriptional regulatory protein TyrR OS=Enterobacter agglomerans GN=tyrR PE=1 SV=1	8.84718	7.53871	7.74124	3.7766
PputA514_1121	Outer membrane protein-like protein	0	0	4.25473	3.77557
PputA514_1222	hypothetical protein	7.15243	3.33777	7.74679	3.77557
PputA514_3685	D-alanyl-D-alanine carboxypeptidase OS=Actinomadura sp. (strain R39) GN=dac PE=1 SV=1	7.95906	8.77034	8.14563	3.7741
PputA514_5676	Glycine cleavage system transcriptional activator OS=Escherichia coli (strain K12) GN=gcvA PE=1 SV=1	0	0	3.46009	3.77325
PputA514_4700	Uncharacterized protein YpfJ OS=Escherichia coli (strain K12) GN=ypfJ PE=4 SV=1	4.03506	0	8.9272	3.77314
PputA514_3999	-	0	0	7.98792	3.76845
PputA514_4022	Uncharacterized HTH-type transcriptional regulator YhjC OS=Escherichia coli (strain K12) GN=yhjC PE=4 SV=2	0	3.50779	0	3.76581
PputA514_2183	Nodulation protein S OS=Bradyrhizobium diazoefficiens (strain JCM 10833 / IAM 13628 / NBRC 14792 / USDA 110) GN=nodS PE=3 SV=1	8.42298	0	0	3.7646
PputA514_0708	Transcriptional regulatory protein DevR (DosR) OS=Mycobacterium tuberculosis GN=devR PE=1 SV=2	2.99638	3.8261	7.72953	3.76389
PputA514_3659	Recombination protein RecR OS=Pseudomonas fluorescens (strain SBW25) GN=recR PE=3 SV=1	0	4.11568	8.19543	3.761
PputA514_2255	Peroxyureidoacrylate/ureidoacrylate amidohydrolase RutB OS=Escherichia coli O45:K1 (strain S88 / ExPEC) GN=rutB PE=3 SV=1	9.6018	9.66181	8.07765	3.75769
PputA514_0521	-	0	0	7.98073	3.75742
PputA514_4252	Bile acid-CoA hydrolase OS=Clostridium scindens (strain JCM 10418 / VPI 12708) GN=baiF PE=1 SV=3	3.65089	4.1121	7.18827	3.75742
PputA514_3634	-	7.79272	3.65794	3.07487	3.75667
PputA514_0042	Inner membrane protein YnbA OS=Escherichia coli (strain K12) GN=ynbA PE=1 SV=2	4.45101	0	7.95228	3.75064
PputA514_2152	Uncharacterized HTH-type transcriptional regulator YqhC OS=Escherichia coli (strain K12) GN=yqhC PE=4 SV=2	0	3.5188	0	3.74909
PputA514_4550	2-dehydro-3-deoxy-6-phosphogalactonate aldolase OS=Escherichia coli (strain K12) GN=dgoA PE=1 SV=1	8.21216	0	4.01132	3.74713
PputA514_4556	Uncharacterized protein ORF1 (Fragment) OS=Chromohalobacter salexigens (strain DSM 3043 / ATCC BAA-138 / NCIMB 13768) PE=4 SV=1	3.34772	0	3.80949	3.74673
PputA514_4106	Ribosomal large subunit pseudouridine synthase B OS=Pseudomonas aeruginosa (strain ATCC 15692 / PAO1 / 1C / PRS 101 / LMG 12228) GN=rluB PE=3 SV=1	3.4764	8.055	3.27722	3.74388
PputA514_1992	Dephospho-CoA kinase OS=Pseudomonas fluorescens (strain Pf-5 / ATCC BAA-477) GN=coaE PE=3 SV=1	0	0	7.93829	3.74364
PputA514_2050	Outer-membrane lipoprotein LolB OS=Pseudomonas fluorescens (strain SBW25) GN=lolB PE=3 SV=1	0	4.3054	8.06349	3.7432
PputA514_5944	HTH-type transcriptional regulator DmlR OS=Escherichia coli (strain K12) GN=dmlR PE=1 SV=2	0	0	0	3.74203
PputA514_1997	hypothetical protein	0	0	3.42356	3.73669
PputA514_4797	Uncharacterized protein YcaC OS=Escherichia coli (strain K12) GN=ycaC PE=1 SV=1	8.55291	9.92571	3.71259	3.73323
PputA514_5280	Glutathione S-transferase YfcF OS=Escherichia coli (strain K12) GN=yfcF PE=1 SV=1	0	0	0	3.73323
PputA514_2247	4-hydroxy-tetrahydrodipicolinate synthase OS=Methanospirillum hungatei JF-1 (strain ATCC 27890 / DSM 864 / NBRC 100397 / JF-1) GN=dapA PE=3 SV=1	0	0	3.78856	3.72581
PputA514_4727	Ribosomal large subunit pseudouridine synthase E OS=Pseudomonas aeruginosa (strain ATCC 15692 / PAO1 / 1C / PRS 101 / LMG 12228) GN=rluE PE=3 SV=1	0	0	3.41663	3.72238
PputA514_6317	GlcNAc-binding protein A OS=Shewanella oneidensis (strain MR-1) GN=gbpA PE=3 SV=2	8.33852	0	0	3.72238
PputA514_2886	Serine racemase OS=Schizosaccharomyces pombe (strain 972 / ATCC 24843) GN=SRR PE=1 SV=1	8.91314	4.24663	7.70904	3.71221
PputA514_5780	Methyl-accepting chemotaxis protein NahY OS=Pseudomonas putida GN=nahY PE=4 SV=1	8.11162	0	0	3.71158
PputA514_4015	Methyl-accepting chemotaxis protein CtpH OS=Pseudomonas aeruginosa (strain ATCC 15692 / PAO1 / 1C / PRS 101 / LMG 12228) GN=ctpH PE=1 SV=1	3.72779	3.07629	3.39708	3.71027
PputA514_4928	Glucose-1-phosphate thymidylyltransferase OS=Salmonella anatum GN=rmlA PE=3 SV=1	0	0	4.1956	3.70884
PputA514_4829	Methyltransferase-like protein 20 OS=Danio rerio GN=mettl20 PE=2 SV=2	0	0	0	3.70626
PputA514_5935	HTH-type transcriptional regulator RutR OS=Shigella flexneri GN=rutR PE=3 SV=1	8.49234	8.28019	8.51795	3.703
PputA514_0127	hypothetical protein	4.24667	0	4.61625	3.69971
PputA514_4565	Ribosomal RNA small subunit methyltransferase B OS=Pseudomonas syringae pv. tomato (strain DC3000) GN=rsmB PE=3 SV=1	3.09234	7.07927	3.17798	3.69882
PputA514_4190	Uncharacterized protein YeaC OS=Bacillus subtilis (strain 168) GN=yeaC PE=3 SV=2	4.10541	6.89182	0	3.69753
PputA514_2605	3-(3-hydroxy-phenyl)propionate/3-hydroxycinnamic acid hydroxylase OS=Comamonas testosteroni GN=mhpA PE=3 SV=1	0	3.38726	6.03118	3.69358
PputA514_1298	Transcriptional regulatory protein tctD OS=Salmonella typhimurium (strain LT2 / SGSC1412 / ATCC 700720) GN=tctD PE=2 SV=1	0	0	8.69935	3.68991
PputA514_2185	acyl-CoA dehydrogenase	3.28887	0	7.91769	3.68787
PputA514_0486	Transcriptional regulatory protein QseB OS=Haemophilus influenzae (strain ATCC 51907 / DSM 11121 / KW20 / Rd) GN=qseB PE=3 SV=1	0	0	7.70584	3.68574
PputA514_3079	Uncharacterized protein YbiB OS=Escherichia coli (strain K12) GN=ybiB PE=1 SV=1	3.73258	3.42768	7.04485	3.68574
PputA514_3605	-	0	0	0	3.68456
PputA514_3320	HTH-type transcriptional repressor PurR OS=Actinobacillus pleuropneumoniae serotype 3 (strain JL03) GN=purR PE=3 SV=1	0	0	0	3.68355
PputA514_0082	Uncharacterized protein YIR042C OS=Saccharomyces cerevisiae (strain ATCC 204508 / S288c) GN=YIR042C PE=4 SV=1	10.9707	9.595	0	3.68246
PputA514_2323	Uncharacterized lipoprotein YdcL OS=Escherichia coli (strain K12) GN=ydcL PE=4 SV=1	4.57594	0	7.69938	3.68246
PputA514_6376	Flagellar motor switch protein FliG OS=Pseudomonas aeruginosa (strain ATCC 15692 / PAO1 / 1C / PRS 101 / LMG 12228) GN=fliG PE=3 SV=2	3.92933	0	0	3.68242
PputA514_4975	tRNA N6-adenosine threonylcarbamoyltransferase OS=Pseudomonas fluorescens (strain SBW25) GN=tsaD PE=3 SV=1	0	0	0	3.67604
PputA514_3673	DNA ligase OS=Pseudomonas fluorescens (strain SBW25) GN=ligA PE=3 SV=1	6.43754	6.83664	7.65243	3.67556
PputA514_5714	Motility protein B OS=Salmonella typhimurium (strain LT2 / SGSC1412 / ATCC 700720) GN=motB PE=1 SV=1	7.4808	3.40843	3.36075	3.67392
PputA514_1703	Ribosomal RNA large subunit methyltransferase F OS=Pseudomonas fluorescens (strain SBW25) GN=rlmF PE=3 SV=1	4.06629	3.73507	0	3.67281
PputA514_4251	Uncharacterized protein YfdE OS=Escherichia coli (strain K12) GN=yfdE PE=1 SV=2	3.71969	4.02753	7.60407	3.67281
PputA514_2254	trehalose synthase	0	0	4.07251	3.67073
PputA514_4277	Glutamine--fructose-6-phosphate aminotransferase [isomerizing] OS=Thermotoga maritima (strain ATCC 43589 / MSB8 / DSM 3109 / JCM 10099) GN=glmS PE=3 SV=3	0	3.4127	3.3574	3.67073
PputA514_4750	Lipoyl synthase OS=Pseudomonas fluorescens (strain SBW25) GN=lipA PE=3 SV=1	8.92226	8.04504	3.36287	3.66859
PputA514_5527	Hemolysin transporter protein HpmB OS=Proteus mirabilis GN=hpmB PE=3 SV=1	0	0	3.49229	3.66649
PputA514_3679	Xanthine dehydrogenase/oxidase OS=Mus musculus GN=Xdh PE=1 SV=5	2.80883	3.08886	6.5475	3.66559
PputA514_0407	UPF0001 protein PA0394 OS=Pseudomonas aeruginosa (strain ATCC 15692 / PAO1 / 1C / PRS 101 / LMG 12228) GN=PA0394 PE=3 SV=1	9.10464	5.01175	8.44099	3.66452
PputA514_2265	hypothetical protein	4.21775	0	4.43497	3.6633
PputA514_2821	CDP-diacylglycerol--serine O-phosphatidyltransferase OS=Escherichia coli (strain K12) GN=pssA PE=1 SV=2	0	0	6.7619	3.66268
PputA514_0467	Selenide, water dikinase OS=Pseudomonas syringae pv. tomato (strain DC3000) GN=selD PE=3 SV=1	0	7.62872	7.36648	3.66227
PputA514_1802	Phytochrome-like protein cph2 OS=Synechocystis sp. (strain PCC 6803 / Kazusa) GN=cph2 PE=1 SV=1	0	0	7.49802	3.66227
PputA514_5564	Uxu operon regulator OS=Haemophilus influenzae (strain ATCC 51907 / DSM 11121 / KW20 / Rd) GN=uxuR PE=3 SV=1	0	0	7.76757	3.6583
PputA514_3905	Flagella basal body P-ring formation protein FlgA OS=Yersinia enterocolitica GN=flgA PE=3 SV=1	0	0	0	3.65703
PputA514_6433	DnaA regulatory inactivator Hda OS=Yersinia enterocolitica serotype O:8 / biotype 1B (strain NCTC 13174 / 8081) GN=hda PE=3 SV=1	4.44489	0	7.92238	3.65517
PputA514_0835	Orotidine 5'-phosphate decarboxylase OS=Pseudomonas fluorescens (strain SBW25) GN=pyrF PE=3 SV=1	4.33988	4.34933	7.6423	3.65394
PputA514_2192	Malto-oligosyltrehalose trehalohydrolase OS=Deinococcus radiodurans (strain ATCC 13939 / DSM 20539 / JCM 16871 / LMG 4051 / NBRC 15346 / NCIMB 9279 / R1 / VKM B-1422) GN=treZ PE=1 SV=1	3.17763	0	6.24184	3.65271
PputA514_2391	3-oxo-Delta(4,5)-steroid 5-beta-reductase OS=Digitalis lanata PE=1 SV=1	6.93515	0	3.70643	3.65111
PputA514_4799	-	0	0	3.62534	3.64602
PputA514_4833	Uncharacterized ABC transporter ATP-binding protein Rv0986/MT1014 OS=Mycobacterium tuberculosis GN=Rv0986 PE=2 SV=1	3.68848	0	0	3.64159
PputA514_6316	Chitinase D OS=Bacillus circulans GN=chiD PE=1 SV=4	0	0	0	3.64159
PputA514_2368	-	0	3.20232	2.83437	3.64006
PputA514_0147	Protein phosphatase PrpC OS=Bacillus subtilis (strain 168) GN=prpC PE=4 SV=1	0	0	3.61925	3.63992
PputA514_1691	Lipopolysaccharide export system permease protein LptG OS=Haemophilus influenzae (strain ATCC 51907 / DSM 11121 / KW20 / Rd) GN=lptG PE=3 SV=1	0	0	3.69427	3.63895
PputA514_4689	tRNA/tmRNA (uracil-C(5))-methyltransferase OS=Pseudomonas fluorescens (strain SBW25) GN=trmA PE=3 SV=1	3.2325	3.69371	4.03329	3.63895
PputA514_6379	Transcriptional regulatory protein FlbD OS=Caulobacter crescentus (strain ATCC 19089 / CB15) GN=flbD PE=4 SV=2	6.50988	0	0	3.63857
PputA514_4368	-	9.51871	8.74514	0	3.6355
PputA514_3797	Fatty acid oxidation complex subunit alpha OS=Escherichia coli O9:H4 (strain HS) GN=fadJ PE=3 SV=1	0	0	7.23497	3.63452
PputA514_2553	Putrescine-binding periplasmic protein OS=Escherichia coli (strain K12) GN=potF PE=1 SV=3	3.89343	4.06219	3.82578	3.63147
PputA514_3809	Uncharacterized HTH-type transcriptional regulator YjiR OS=Escherichia coli (strain K12) GN=yjiR PE=1 SV=1	0	3.85416	3.32524	3.631
PputA514_0613	sn-glycerol-3-phosphate import ATP-binding protein UgpC OS=Rhizobium loti (strain MAFF303099) GN=ugpC PE=3 SV=1	0	3.38924	0	3.62699
PputA514_3796	Putative glutamine amidotransferase YLR126C OS=Saccharomyces cerevisiae (strain ATCC 204508 / S288c) GN=YLR126C PE=1 SV=1	9.50797	9.48301	8.12256	3.62647
PputA514_5436	D-threonine aldolase OS=Arthrobacter sp. PE=1 SV=1	0	3.65993	6.63194	3.62548
PputA514_1757	ATP-dependent RNA helicase RhlB OS=Pseudomonas syringae pv. tomato (strain DC3000) GN=rhlB PE=3 SV=1	3.95543	7.62129	5.90565	3.62354
PputA514_1814	Phospho-N-acetylmuramoyl-pentapeptide-transferase OS=Pseudomonas fluorescens (strain SBW25) GN=mraY PE=3 SV=1	0	0	0	3.62106
PputA514_5184	Cation efflux system protein CusC OS=Escherichia coli O6:H1 (strain CFT073 / ATCC 700928 / UPEC) GN=cusC PE=3 SV=1	0	0	0	3.62059
PputA514_1753	Inner membrane amino-acid ABC transporter permease protein YhdY OS=Escherichia coli (strain K12) GN=yhdY PE=1 SV=2	0	3.86151	8.74398	3.61954
PputA514_6352	RNA polymerase sigma factor FliA OS=Pseudomonas aeruginosa (strain ATCC 15692 / PAO1 / 1C / PRS 101 / LMG 12228) GN=fliA PE=3 SV=1	8.06734	0	3.80596	3.61166
PputA514_0901	Phosphoribosyl 1,2-cyclic phosphodiesterase OS=Escherichia coli (strain K12) GN=phnP PE=1 SV=1	0	0	0	3.61036
PputA514_6401	Putative AraC-like transcription regulator OS=Streptomyces lividans PE=4 SV=1	0	0	0	3.61036
PputA514_4987	Pyrroloquinoline-quinone synthase OS=Pseudomonas putida (strain KT2440) GN=pqqC PE=3 SV=1	4.28597	0	7.95849	3.6075
PputA514_0673	Uncharacterized protein YobB OS=Escherichia coli (strain K12) GN=yobB PE=4 SV=1	0	3.92986	8.28296	3.60292
PputA514_5874	Histidine utilization repressor OS=Pseudomonas putida GN=hutC PE=4 SV=1	0	8.46346	0	3.60292
PputA514_2362	Deoxyribose operon repressor OS=Escherichia coli (strain K12) GN=deoR PE=1 SV=1	0	0	3.28856	3.60175
PputA514_2340	Acyl-CoA dehydrogenase OS=Bacillus subtilis (strain 168) GN=mmgC PE=2 SV=3	3.70099	3.66227	3.90551	3.60003
PputA514_4521	Cytochrome c oxidase subunit 1 OS=Bradyrhizobium diazoefficiens (strain JCM 10833 / IAM 13628 / NBRC 14792 / USDA 110) GN=ctaD PE=2 SV=1	0	0	4.64454	3.60003
PputA514_1002	CHAD domain-containing protein	7.62318	3.65362	0	3.59885
PputA514_4915	Bifunctional enzyme NodQ OS=Rhizobium sp. (strain N33) GN=nodQ PE=3 SV=1	3.32911	0	2.92237	3.59659
PputA514_4515	SURF1-like protein OS=Rickettsia felis (strain ATCC VR-1525 / URRWXCal2) GN=RF_0175 PE=3 SV=1	0	0	4.44384	3.59605
PputA514_4646	Pyruvate dehydrogenase complex repressor OS=Escherichia coli (strain K12) GN=pdhR PE=1 SV=1	8.77278	0	3.5649	3.59318
PputA514_0436	Malonyl-S-ACP:biotin-protein carboxyltransferase MADD OS=Malonomonas rubra GN=madD PE=1 SV=1	0	0	3.56967	3.59035
PputA514_1624	Putative outer membrane protein CC_0351 OS=Caulobacter crescentus (strain ATCC 19089 / CB15) GN=CC_0351 PE=3 SV=1	8.05964	3.61738	7.50023	3.58291
PputA514_5749	Uncharacterized glycosyltransferase HI_1698 OS=Haemophilus influenzae (strain ATCC 51907 / DSM 11121 / KW20 / Rd) GN=HI_1698 PE=3 SV=1	7.68215	3.82488	8.15801	3.58291
PputA514_5111	-	0	0	0	3.58195
PputA514_4798	Putative acid--amine ligase YjfC OS=Escherichia coli (strain K12) GN=yjfC PE=1 SV=2	0	0	6.75055	3.58104
PputA514_3225	-	9.16322	3.63119	8.00755	3.5764
PputA514_1764	UPF0246 protein PFLU_0992 OS=Pseudomonas fluorescens (strain SBW25) GN=PFLU_0992 PE=3 SV=1	9.93959	9.2457	7.11497	3.57452
PputA514_0279	Uncharacterized protein HI_0858 OS=Haemophilus influenzae (strain ATCC 51907 / DSM 11121 / KW20 / Rd) GN=HI_0858 PE=1 SV=1	0	0	0	3.56896
PputA514_5057	-	0	3.31	3.75473	3.56803
PputA514_6344	Sporulation initiation inhibitor protein Soj OS=Bacillus subtilis (strain 168) GN=soj PE=1 SV=1	0	0	3.83784	3.56624
PputA514_5514	Uncharacterized oxidoreductase Rv0484c/MT0502 OS=Mycobacterium tuberculosis GN=Rv0484c PE=3 SV=1	0	0	0	3.56547
PputA514_0960	3-hydroxypropionyl-coenzyme A dehydratase OS=Metallosphaera sedula (strain ATCC 51363 / DSM 5348) GN=Msed_2001 PE=1 SV=1	0	0	4.05023	3.56346
PputA514_2419	Uncharacterized signaling protein PA1727 OS=Pseudomonas aeruginosa (strain ATCC 15692 / PAO1 / 1C / PRS 101 / LMG 12228) GN=PA1727 PE=4 SV=1	7.9836	7.55493	3.67033	3.55963
PputA514_2205	Aliphatic sulfonates import ATP-binding protein SsuB 1 OS=Xanthomonas axonopodis pv. citri (strain 306) GN=ssuB1 PE=3 SV=1	0	0	3.53175	3.55259
PputA514_3798	Putative acyltransferase Rv0859 OS=Mycobacterium tuberculosis GN=fadA PE=1 SV=1	0	0	2.95345	3.5517
PputA514_0379	Formamidopyrimidine-DNA glycosylase OS=Pseudomonas fluorescens (strain Pf-5 / ATCC BAA-477) GN=mutM PE=3 SV=3	0	3.57898	0	3.54453
PputA514_0932	Molybdopterin molybdenumtransferase OS=Escherichia coli (strain K12) GN=moeA PE=1 SV=1	3.14547	7.39322	3.94632	3.54453
PputA514_3160	Macrolide export ATP-binding/permease protein MacB OS=Bdellovibrio bacteriovorus (strain ATCC 15356 / DSM 50701 / NCIB 9529 / HD100) GN=macB PE=3 SV=1	0	0	3.89215	3.54453
PputA514_5742	Protein IolS OS=Bacillus subtilis (strain 168) GN=iolS PE=1 SV=1	7.32181	0	6.76251	3.54453
PputA514_5728	DNA topoisomerase 4 subunit B OS=Pseudomonas aeruginosa (strain ATCC 15692 / PAO1 / 1C / PRS 101 / LMG 12228) GN=parE PE=3 SV=1	3.7146	4.35559	7.39175	3.53611
PputA514_1179	Lipoprotein-releasing system transmembrane protein LolC OS=Xylella fastidiosa (strain 9a5c) GN=lolC PE=3 SV=1	3.41866	3.79492	3.58796	3.53261
PputA514_1385	Pca regulon regulatory protein OS=Pseudomonas putida GN=pcaR PE=2 SV=1	0	9.0369	8.03194	3.52574
PputA514_3464	Alpha-ketoglutarate-dependent taurine dioxygenase OS=Escherichia coli (strain K12) GN=tauD PE=1 SV=3	4.07789	0	0	3.52345
PputA514_0643	Nuclease OS=Serratia marcescens GN=nucA PE=1 SV=2	8.96553	0	3.87353	3.51831
PputA514_3207	Putative acyl-CoA synthetase YngI OS=Bacillus subtilis (strain 168) GN=yngI PE=3 SV=1	0	3.58049	6.70999	3.51831
PputA514_2766	Lysyl aminopeptidase OS=Pyrococcus furiosus (strain ATCC 43587 / DSM 3638 / JCM 8422 / Vc1) GN=PF1861 PE=1 SV=1	0	0	8.09322	3.5155
PputA514_3236	HTH-type transcriptional regulator CysL OS=Bacillus subtilis (strain 168) GN=cysL PE=1 SV=1	4.05238	3.53996	6.97697	3.51296
PputA514_2244	D-amino acid dehydrogenase small subunit OS=Vibrio splendidus (strain LGP32) GN=dadA PE=3 SV=1	0	0	0	3.51213
PputA514_2051	4-diphosphocytidyl-2-C-methyl-D-erythritol kinase OS=Pseudomonas fluorescens (strain SBW25) GN=ispE PE=3 SV=1	0	0	3.20487	3.51057
PputA514_5850	Ribosomal RNA small subunit methyltransferase E OS=Treponema pallidum (strain Nichols) GN=rsmE PE=3 SV=1	7.44629	0	3.69727	3.51046
PputA514_5354	Gamma-glutamylputrescine oxidoreductase OS=Escherichia coli (strain K12) GN=puuB PE=1 SV=2	0	0	0	3.50707
PputA514_0363	HTH-type transcriptional activator CmpR OS=Synechococcus sp. (strain ATCC 27144 / PCC 6301 / SAUG 1402/1) GN=cmpR PE=3 SV=1	3.39395	0	0	3.50045
PputA514_5985	Probable isoprenylcysteine alpha-carbonyl methylesterase ICMEL1 OS=Arabidopsis thaliana GN=ICMEL1 PE=2 SV=1	0	0	4.27973	3.50045
PputA514_5035	Sarcosine oxidase subunit alpha OS=Corynebacterium sp. (strain P-1) GN=soxA PE=3 SV=1	0	5.78957	6.56254	3.50011
PputA514_5303	Glutaminase OS=Pseudomonas fluorescens (strain SBW25) GN=glsA PE=3 SV=1	0	0	0	3.49548
PputA514_5045	Putative dioxygenase subunit alpha YeaW OS=Escherichia coli (strain K12) GN=yeaW PE=3 SV=1	0	0	7.02786	3.49298
PputA514_5967	Uncharacterized protein MJ0779 OS=Methanocaldococcus jannaschii (strain ATCC 43067 / DSM 2661 / JAL-1 / JCM 10045 / NBRC 100440) GN=MJ0779 PE=4 SV=1	3.37898	0	7.30551	3.49298
PputA514_1441	Acyl-homoserine lactone acylase QuiP OS=Pseudomonas fluorescens (strain Pf0-1) GN=quiP PE=3 SV=1	0	6.7102	6.62602	3.49098
PputA514_0936	Uncharacterized RNA pseudouridine synthase Cpar_0723 OS=Chlorobaculum parvum (strain NCIB 8327) GN=Cpar_0723 PE=3 SV=1	0	0	0	3.48566
PputA514_3299	Acetyltransferase YE1169 OS=Yersinia enterocolitica serotype O:8 / biotype 1B (strain NCTC 13174 / 8081) GN=YE1169 PE=3 SV=1	4.16171	8.13316	8.14718	3.48324
PputA514_5968	-	0	0	3.17001	3.48324
PputA514_4543	HTH-type transcriptional regulator TrpI OS=Pseudomonas syringae pv. syringae GN=trpI PE=4 SV=1	0	0	0	3.48081
PputA514_6345	Uncharacterized protein YtxE OS=Bacillus subtilis (strain 168) GN=ytxE PE=3 SV=1	0	3.83533	0	3.48064
PputA514_0115	Chemotaxis protein CheY OS=Enterobacter cloacae GN=cheY PE=3 SV=3	3.36437	8.03851	3.82617	3.47838
PputA514_2774	Glucose--fructose oxidoreductase OS=Zymomonas mobilis subsp. mobilis (strain ATCC 31821 / ZM4 / CP4) GN=gfo PE=1 SV=2	0	0	0	3.47599
PputA514_6422	Nicotinate-nucleotide--dimethylbenzimidazole phosphoribosyltransferase OS=Pseudomonas fluorescens (strain SBW25) GN=cobT PE=3 SV=1	3.06947	6.74117	3.37033	3.47599
PputA514_5511	Uncharacterized HTH-type transcriptional regulator YbfI OS=Bacillus subtilis (strain 168) GN=ybfI PE=4 SV=1	3.36925	0	0	3.47576
PputA514_5655	Uncharacterized protein YhjG OS=Escherichia coli (strain K12) GN=yhjG PE=4 SV=3	3.36925	0	7.07844	3.47576
PputA514_6335	Signal transduction histidine-protein kinase/phosphatase DegS OS=Bacillus subtilis (strain 168) GN=degS PE=1 SV=2	0	0	0	3.47576
PputA514_5857	Glucans biosynthesis glucosyltransferase H OS=Pseudomonas fluorescens (strain SBW25) GN=opgH PE=3 SV=1	3.47878	6.46007	5.69762	3.47413
PputA514_1528	Uncharacterized protein YfhR OS=Salmonella typhi GN=yhfR PE=3 SV=1	0	0	3.82135	3.47354
PputA514_4432	HTH-type transcriptional regulator AlsR OS=Bacillus subtilis (strain 168) GN=alsR PE=4 SV=1	0	0	6.62009	3.47337
PputA514_4862	HTH-type transcriptional regulator AlsR OS=Bacillus subtilis (strain 168) GN=alsR PE=4 SV=1	0	0	0	3.4712
PputA514_6270	50S ribosomal protein L3 glutamine methyltransferase OS=Pseudomonas aeruginosa (strain ATCC 15692 / PAO1 / 1C / PRS 101 / LMG 12228) GN=prmB PE=3 SV=1	4.01814	4.52594	3.45049	3.4712
PputA514_3938	Nitrogen regulation protein NR(I) OS=Escherichia coli (strain K12) GN=glnG PE=3 SV=1	7.24903	3.50455	3.66443	3.47014
PputA514_1799	Sensor kinase CusS OS=Escherichia coli O157:H7 GN=cusS PE=3 SV=1	0	3.2041	0	3.46955
PputA514_2828	Aspartate beta-hydroxylase domain-containing protein 2 OS=Homo sapiens GN=ASPHD2 PE=2 SV=1	3.35478	7.81182	7.25707	3.46879
PputA514_0417	TonB family protein	3.85959	3.82081	3.44528	3.46614
PputA514_2420	Uncharacterized HTH-type transcriptional regulator YhjC OS=Escherichia coli (strain K12) GN=yhjC PE=4 SV=2	0	0	0	3.46614
PputA514_5933	Probable HTH-type transcriptional regulator LrrA OS=Synechococcus elongatus (strain PCC 7942) GN=lrrA PE=4 SV=2	3.84768	0	7.98556	3.46169
PputA514_3269	Sulfide dehydrogenase subunit alpha OS=Pyrococcus furiosus (strain ATCC 43587 / DSM 3638 / JCM 8422 / Vc1) GN=sudA PE=1 SV=1	0	0	2.86233	3.46056
PputA514_5465	Uncharacterized protein YdcJ OS=Escherichia coli (strain K12) GN=ydcJ PE=4 SV=1	3.34925	0	0	3.45579
PputA514_6387	3-oxoacyl-[acyl-carrier-protein] synthase 3 OS=Lactococcus lactis subsp. lactis (strain IL1403) GN=fabH PE=3 SV=1	0	7.9445	3.43395	3.45465
PputA514_3913	-	7.84877	0	7.74288	3.45423
PputA514_6288	Chitin deacetylase 1 OS=Schizosaccharomyces pombe (strain 972 / ATCC 24843) GN=cda1 PE=1 SV=1	6.83935	0	0	3.44953
PputA514_6269	-	3.33366	0	0	3.44765
PputA514_4209	Uncharacterized HTH-type transcriptional regulator YqhC OS=Escherichia coli (strain K12) GN=yqhC PE=4 SV=2	0	3.7741	3.42637	3.44717
PputA514_0818	Probable HTH-type transcriptional regulator LtrA OS=Klebsiella pneumoniae GN=ltrA PE=4 SV=1	0	0	3.43166	3.44486
PputA514_2533	Bifunctional epoxide hydrolase 2 OS=Sus scrofa GN=EPHX2 PE=2 SV=1	0	0	3.43166	3.44486
PputA514_5429	Signal-transduction and transcriptional-control protein OS=Clostridium beijerinckii GN=stc PE=4 SV=3	0	0	0	3.44486
PputA514_3920	-	7.98175	7.63805	7.21486	3.44022
PputA514_0555	Uncharacterized HTH-type transcriptional regulator YwbI OS=Bacillus subtilis (strain 168) GN=ywbI PE=4 SV=1	3.82448	0	3.70266	3.4385
PputA514_1234	-	0	0	0	3.43789
PputA514_4185	Exodeoxyribonuclease I OS=Escherichia coli (strain K12) GN=sbcB PE=1 SV=2	3.18386	3.19924	2.83139	3.43697
PputA514_3818	Transcriptional regulator KdgR OS=Escherichia coli (strain K12) GN=kdgR PE=1 SV=1	3.82222	3.46318	0	3.43623
PputA514_4069	Monoglyceride lipase OS=Homo sapiens GN=MGLL PE=1 SV=2	3.82907	0	4.35963	3.43561
PputA514_6045	-	7.85529	6.4679	5.54462	3.43561
PputA514_2687	-	2.82106	0	2.91442	3.43506
PputA514_4304	Murein DD-endopeptidase MepM OS=Shigella flexneri GN=mepM PE=3 SV=1	8.09486	8.1197	7.91295	3.43104
PputA514_0277	Uncharacterized protein YhiI OS=Escherichia coli (strain K12) GN=yhiI PE=4 SV=1	4.47414	0	0	3.42718
PputA514_0515	UDP-glucose:undecaprenyl-phosphate glucose-1-phosphate transferase OS=Escherichia coli (strain K12) GN=wcaJ PE=1 SV=2	0	0	3.82527	3.42343
PputA514_2985	Probable deferrochelatase/peroxidase YfeX OS=Escherichia coli (strain K12) GN=yfeX PE=1 SV=2	0	0	0	3.42193
PputA514_4303	Exodeoxyribonuclease 7 large subunit OS=Pseudomonas fluorescens (strain SBW25) GN=xseA PE=3 SV=1	0	0	2.82077	3.41897
PputA514_3339	Probable efflux pump outer membrane protein TtgC OS=Pseudomonas putida (strain KT2440) GN=ttgC PE=1 SV=1	3.30204	0	0	3.416
PputA514_5704	tRNA dimethylallyltransferase OS=Pseudomonas fluorescens (strain SBW25) GN=miaA PE=3 SV=1	3.96967	6.9271	3.60954	3.41524
PputA514_4087	Uncharacterized protein YbjS OS=Escherichia coli (strain K12) GN=ybjS PE=3 SV=2	7.0588	8.80011	8.45291	3.41302
PputA514_3857	Probable xanthine dehydrogenase subunit A OS=Bacillus subtilis (strain 168) GN=pucA PE=2 SV=1	0	0	0	3.41162
PputA514_5977	-	0	0	0	3.40939
[truncated: 1,205 more rows]
