# Supplementary material for: Systems biology-guided biodesign of consolidated lignin conversion
Source: Royal Society of Chemistry journal article supplement (doi:10.1039/c6gc01131d), 2016-01-01
Supplement: c6gc01131d5.xlsx [file c6gc01131d5.xlsx]

## Sheet: Sheet3
Table S3. Genes encoding oxidoreductases in P. putida A514 and twelve other P. putida strains.
description	A514	BIRD-1	DLL-E4	DOT-T1E	F1	GB-1	H8234	HB3267	KT2440	NBRC-14164	ND6	S16	W619
Cytochrome c551 peroxidase OS=Nitrosomonas europaea (strain ATCC 19718 / NBRC 14298) GN=ccp PE=1 SV=2	PputA514_1634	PPUBIRD1_2732	-	T1E_3828	Pput_2744	-	-	-	PP_2943	-	YSA_10129	-	-
Peroxidasin homolog OS=Caenorhabditis briggsae GN=pxn-1 PE=3 SV=1	PputA514_6449	-	-	-	-	-	-	-	-	-	-	-	PputW619_1882
Peroxidasin OS=Drosophila melanogaster GN=Pxn PE=1 SV=1	PputA514_3972	-	DW66_2366	-	-	PputGB1_3353	-	B479_10960	-	-	-	-	-
Dye-decolorizing peroxidase Tfu_3078 OS=Thermobifida fusca (strain YX) GN=Tfu_3078 PE=1 SV=1	PputA514_2985	-	-	-	-	-	-	-	-	-	-	-	-
Non-heme chloroperoxidase OS=Pseudomonas fluorescens GN=cpo PE=1 SV=3	PputA514_4069	PPUBIRD1_5047	DW66_5675	T1E_5488	Pput_5163	PputGB1_4058	-	B479_26010	PP_5253	-	YSA_10896	PPS_5105	PputW619_3846
Non-heme chloroperoxidase OS=Streptomyces aureofaciens GN=cpo PE=1 SV=1	PputA514_0512	-	DW66_5262	-	-	PputGB1_5078	-	B479_24600	-	-	-	PPS_4871	PputW619_1851
Non-heme chloroperoxidase OS=Streptomyces lividans GN=cpo PE=1 SV=2	PputA514_0840	PPUBIRD1_3112	DW66_4009	T1E_3343	Pput_3148	PputGB1_3736	L483_23165	B479_17750	PP_4164	PP4_32970	YSA_08523	PPS_3565	PputW619_3489
Putative non-heme chloroperoxidase OS=Synechocystis sp. (strain PCC 6803 / Kazusa) GN=slr0314 PE=3 SV=1	PputA514_5835	PPUBIRD1_4816	DW66_5239	T1E_5659	Pput_4902	PputGB1_5054	L483_30295	B479_24485	PP_5028	PP4_50950	YSA_04153	PPS_4848	PputW619_4521
Alcohol oxidase OS=Candida boidinii GN=AOD1 PE=1 SV=1	PputA514_2891	PPUBIRD1_2104	DW66_0031	T1E_0882	Pput_0072	PputGB1_0072	L483_32335	B479_00610	PP_1949	PP4_00480	YSA_05080	PPS_0019	PputW619_0075
Alcohol oxidase OS=Pichia angusta GN=MOX PE=3 SV=1	PputA514_5075	-	-	-	-	PputGB1_3099	L483_14545	-	-	PP4_51270	-	-	-
Glucose oxidase OS=Aspergillus niger GN=gox PE=1 SV=1, GMC family generate H2O2	PputA514_0720	PPUBIRD1_4853	DW66_5301	T1E_0195	Pput_4937	PputGB1_5115	L483_30460	B479_24795	PP_5064	-	YSA_04239	PPS_4910	PputW619_0401
Aldehyde oxidase OS=Bos taurus GN=AOX1 PE=1 SV=2	PputA514_3679	PPUBIRD1_2166	DW66_4110	T1E_1805	Pput_2111	PputGB1_3843	L483_23710	B479_18260	PP_4279	PP4_22080	YSA_09571	PPS_3683	PputW619_3605
Aldehyde oxidase OS=Mus musculus GN=Aox1 PE=2 SV=2	PputA514_3677	-	-	-	-	-	-	-	-	-	-	-	-
Aldehyde oxidase OS=Rattus norvegicus GN=Aox1 PE=2 SV=1	PputA514_4684	PPUBIRD1_2167	DW66_4109	T1E_1806	Pput_2112	PputGB1_3842	L483_23705	B479_18255	PP_4278	PP4_22090	YSA_09572	PPS_3682	PputW619_3604
Indole-3-acetaldehyde oxidase OS=Arabidopsis thaliana GN=AAO2 PE=1 SV=2	PputA514_4686	-	-	-	-	-	-	-	-	-	-	PPS_4078	-
Benzaldehyde dehydrogenase (NAD(+)) OS=Arabidopsis thaliana GN=AAO4 PE=1 SV=2	PputA514_2849	PPUBIRD1_2457	DW66_4069	T1E_5458	Pput_2435	PputGB1_3799	L483_23495	B479_18040	PP_4233	PP4_30270	YSA_11046	PPS_3627	PputW619_3557
Pyruvate oxidase OS=Lactobacillus plantarum (strain ATCC BAA-793 / NCIMB 8826 / WCFS1) GN=pox5 PE=1 SV=3	PputA514_5396	PPUBIRD1_4380	DW66_4913	T1E_5412	Pput_4544	PputGB1_4678	L483_27950	B479_25845	PP_4680	PP4_20780	YSA_11118	PPS_4523	PputW619_2979
Pyruvate oxidase OS=Streptococcus pneumoniae serotype 4 (strain ATCC BAA-334 / TIGR4) GN=spxB PE=3 SV=2	PputA514_4585	PPUBIRD1_2416	DW66_4129	T1E_3886	Pput_1572	PputGB1_3862	L483_23800	B479_18350	PP_4297	PP4_14690	YSA_08241	PPS_3701	PputW619_3622
Laccase-2 OS=Botryotinia fuckeliana GN=lcc2 PE=2 SV=1 (copper oxidase)	PputA514_1683	-	DW66_0546	T1E_4513	Pput_0574	-	L483_16360	B479_03165	PP_5380	-	YSA_06093	PPS_0532	-
Glutathione-regulated potassium-efflux system ancillary protein KefF OS=Escherichia coli O6:K15:H31 (strain 536 / UPEC) GN=kefF PE=3 SV=1	PputA514_4430	-	-	-	-	-	-	-	-	-	-	-	-
NAD(P)H dehydrogenase (quinone) OS=Mycobacterium tuberculosis GN=lpdA PE=1 SV=1	PputA514_3697	PPUBIRD1_5107	DW66_5862	T1E_5102	Pput_5274	PputGB1_5416	L483_31975	B479_26565	PP_5371	PP4_15710	YSA_09269	PPS_5234	PputW619_5145
NAD(P)H dehydrogenase [quinone] 1 OS=Cavia porcellus GN=NQO1 PE=2 SV=1	PputA514_5161	PPUBIRD1_3259	-	T1E_4844	Pput_2966	PputGB1_2068	L483_09910	B479_16385	PP_2789	PP4_33790	YSA_09867	-	PputW619_3074
NAD(P)H dehydrogenase [quinone] 1 OS=Rattus norvegicus GN=Nqo1 PE=1 SV=4	PputA514_6474	PPUBIRD1_2869	DW66_4321	T1E_4847	Pput_2823	PputGB1_4656	L483_27800	B479_19285	PP_4538	PP4_36770	YSA_09954	PPS_3883	PputW619_3831
Flavoprotein WrbA OS=Desulfovibrio magneticus (strain ATCC 700980 / DSM 13731 / RS-1) GN=wrbA PE=3 SV=1	PputA514_3068	-	-	-	-	-	-	-	-	-	-	-	-
NADPH:quinone oxidoreductase OS=Arabidopsis thaliana GN=NQR PE=1 SV=1	PputA514_5399	-	-	-	-	-	-	-	PP_1927	-	-	-	-
Quinone oxidoreductase 2 OS=Escherichia coli (strain K12) GN=qorB PE=1 SV=1	PputA514_2485	PPUBIRD1_4168	-	T1E_0249	Pput_4332	PputGB1_4420	L483_26495	-	PP_1392	PP4_09410	YSA_02874	-	PputW619_1033
NADPH--cytochrome P450 reductase OS=Aspergillus oryzae (strain ATCC 42149 / RIB 40) GN=cprA PE=3 SV=1	PputA514_1963	PPUBIRD1_0911	DW66_1639	T1E_5143	Pput_0890	PputGB1_1302	L483_06075	B479_06545	PP_0860	PP4_44140	YSA_06804	PPS_1352	PputW619_4318
NADPH--cytochrome P450 reductase OS=Saccharomyces cerevisiae (strain ATCC 204508 / S288c) GN=NCP1 PE=1 SV=3 dypB (RHA1)	PputA514_2432	-	-	-	-	-	L483_04350	-	-	-	-	-	-
